# Supplementary material for: Transcriptomic Analysis Implies That GA Regulates Sex Expression via Ethylene-Dependent and Ethylene-Independent Pathways in Cucumber (Cucumis sativus L.)
Source: Front Plant Sci. 2017 Jan 19;8:10. doi: 10.3389/fpls.2017.00010 (PMC5243814; doi:10.3389/fpls.2017.00010)
Supplement: Supplementary file 1 [file Table_1.XLSX]

## Sheet: Sheet1
Table S1. Differentially expressed genes after 6 h of exogenous GA treatment.
Gene ID	GA 6h_readcount	Control_readcount	log2 Fold Change	Fold Change (GA 6h/Control)	P-value	FDR	Blast swiss prot
Csa1M050220	12.4263	0	Inf	Inf	0.00056681	0.0043926	sp|Q70PR7|VINSY_RAUSE Vinorine synthase OS=Rauvolfia serpentina GN=ACT PE=1 SV=2//2.45595e-13
Csa2M175170	12.4057	0	Inf	Inf	0.00057027	0.0044173	sp|Q494P0|PHT17_ARATH Probable inorganic phosphate transporter 1-7 OS=Arabidopsis thaliana GN=PHT1-7 PE=2 SV=2//0
Csa2M258730	12.3442	0	Inf	Inf	0.00058079	0.0044859	sp|Q9FK62|SAU24_ARATH Auxin-responsive protein SAUR24 OS=Arabidopsis thaliana GN=SAUR24 PE=2 SV=1//6.80889e-33
Csa3M651800	8.53964	0	Inf	Inf	0.0065024	0.033554	sp|Q50EK4|C75A1_PINTA Cytochrome P450 750A1 OS=Pinus taeda GN=CYP750A1 PE=2 SV=1//1.28886e-51
Csa4M304750	13.2748	0	Inf	Inf	0.00031972	0.0026647	sp|Q9SR36|GSTU8_ARATH Glutathione S-transferase U8 OS=Arabidopsis thaliana GN=GSTU8 PE=2 SV=1//2.96299e-53
Csa5M632120	8.56016	0	Inf	Inf	0.0064631	0.033376	sp|O04529|2MMP_ARATH Metalloendoproteinase 2-MMP OS=Arabidopsis thaliana GN=2MMP PE=1 SV=1//4.28227e-71
Csa6M504400	11.4751	0	Inf	Inf	0.0010364	0.0073512	sp|Q9SPV4|SAMT_CLABR Salicylate carboxymethyltransferase OS=Clarkia breweri GN=SAMT PE=1 SV=1//1.89752e-115
Csa6M446290	25.879	0.550071	5.556	47.046	0.0054728	0.029223	sp|P45732|PALY_STYHU Phenylalanine ammonia-lyase OS=Stylosanthes humilis GN=PAL17.1 PE=2 SV=1//0
Csa7M446780	19.6316	0.49794	5.3011	39.4267	0.00039778	0.0032072	sp|O81832|Y4729_ARATH G-type lectin S-receptor-like serine/threonine-protein kinase At4g27290 OS=Arabidopsis thaliana GN=At4g27290 PE=3 SV=4//1.15508e-55
Csa3M020610	57.533	1.49382	5.2673	38.5137	3.0672e-13	1.5096e-11	sp|Q93VK8|RGF6_ARATH Root meristem growth factor 6 OS=Arabidopsis thaliana GN=RGF6 PE=3 SV=1//1.62932e-07
Csa3M099630	21.089	0.550071	5.2607	38.3379	0.0012589	0.0086319	sp|Q9M815|PCR8_ARATH Protein PLANT CADMIUM RESISTANCE 8 OS=Arabidopsis thaliana GN=PCR8 PE=1 SV=2//4.563e-66
Csa4M011720	18.0715	0.49794	5.1816	36.2925	9.4529e-05	0.00090744	-//-
Csa2M258660	36.0265	1.10014	5.0333	32.7472	0.0069132	0.035201	SAU21_ARATH Auxin-responsive protein SAUR21
Csa6M410040	98.7943	3.0919	4.9979	31.9535	4.5288e-21	5.2076e-19	sp|Q9SY06|FAF1_ARATH Protein FANTASTIC FOUR 1 OS=Arabidopsis thaliana GN=FAF1 PE=2 SV=1//1.49056e-15
Csa2M297260	15.786	0.550071	4.8429	28.6984	0.00036502	0.0029855	-//-
Csa6M147590	26.4058	0.99588	4.7287	26.5143	0.0012991	0.0088627	sp|Q9ZUZ3|SAU32_ARATH Auxin-responsive protein SAUR32
Csa5M023870	14.2669	0.550071	4.6969	25.9363	0.0008542	0.0062582	sp|Q5PNY6|PUB21_ARATH U-box domain-containing protein 21 OS=Arabidopsis thaliana GN=PUB21 PE=2 SV=1//2.50176e-115
Csa7M394040	12.3647	0.550071	4.4905	22.4789	0.0025498	0.015537	-//-
Csa7M000020	10.4008	0.49794	4.3846	20.888	0.0077189	0.038618	sp|Q1A173|RADL6_ARATH Protein RADIALIS-like 6 OS=Arabidopsis thaliana GN=RL6 PE=2 SV=1//1.39487e-29
Csa2M270200	9.99712	0.49794	4.3275	20.0774	0.0099165	0.04704	-//-
Csa1M188670	763.181	40.2648	4.2444	18.9536	8.0799e-08	1.5468e-06	sp|Q8LF99|XTH6_ARATH Probable xyloglucan endotransglucosylase/hydrolase protein 6 OS=Arabidopsis thaliana GN=XTH6 PE=2 SV=2//1.5493e-158
Csa5M146870	316.26	18.5226	4.0937	17.0737	0.0042451	0.02371	sp|Q05963|FL3H_CALCH Naringenin,2-oxoglutarate 3-dioxygenase OS=Callistephus chinensis GN=FHT PE=2 SV=1//1.4781e-69
Csa4M354130	345.889	20.6708	4.0646	16.7327	4.8586e-08	9.8284e-07	sp|Q55EX9|Y8948_DICDI Putative methyltransferase DDB_G0268948 OS=Dictyostelium discoideum GN=DDB_G0268948 PE=1 SV=2//2.03682e-28
Csa1M575130	330.897	20.1495	4.0376	16.4225	3.6576e-51	2.3132e-48	sp|O82200|MIOX2_ARATH Inositol oxygenase 2 OS=Arabidopsis thaliana GN=MIOX2 PE=2 SV=2//1.71283e-168
Csa2M368990	70.1645	4.68998	3.9031	14.9606	2.5523e-09	6.5727e-08	sp|Q9M1S3|ARP1_ARATH Probable RNA-binding protein ARP1 OS=Arabidopsis thaliana GN=ARP1 PE=2 SV=1//3.35521e-29
Csa1M068570	67.9749	4.74211	3.8414	14.3343	2.5979e-12	1.1377e-10	sp|P0CV94|NES1_FRAAN (3S,6E)-nerolidol synthase 1 OS=Fragaria ananassa PE=1 SV=1//1.5905e-172
Csa1M523640	64.5399	4.63785	3.7987	13.9163	1.5375e-05	0.00018124	sp|Q09893|YAI5_SCHPO Uncharacterized protein C24B11.05 OS=Schizosaccharomyces pombe (strain 972 / ATCC 24843) GN=SPAC24B11.05 PE=3 SV=1//3.81113e-15
Csa6M007450	71.7041	5.44858	3.7181	13.1601	1.4691e-05	0.00017444	sp|F8WKW0|UGT1_GARJA Crocetin glucosyltransferase, chloroplastic OS=Gardenia jasminoides GN=UGT75L6 PE=1 SV=1//1.04623e-142
Csa2M258720	34.747	2.64609	3.715	13.1319	1.032e-06	1.5738e-05	sp|Q9FK62|SAU24_ARATH Auxin-responsive protein SAUR24 OS=Arabidopsis thaliana GN=SAUR24 PE=2 SV=1//1.5233e-30
Csa1M065420	97.7816	7.83401	3.6417	12.4813	4.1034e-16	2.7747e-14	sp|Q8S9L6|CRK29_ARATH Cysteine-rich receptor-like protein kinase 29 OS=Arabidopsis thaliana GN=CRK29 PE=2 SV=1//4.64754e-118
Csa4M051470	3375.11	273.044	3.6277	12.3608	3.1725e-14	1.727e-12	sp|Q8H0Y8|WRK41_ARATH Probable WRKY transcription factor 41 OS=Arabidopsis thaliana GN=WRKY41 PE=2 SV=2//3.01047e-55
Csa1M065920	154.309	12.6283	3.6111	12.2194	6.8078e-24	9.4444e-22	sp|Q9T0J1|CRK26_ARATH Cysteine-rich receptor-like protein kinase 26 OS=Arabidopsis thaliana GN=CRK26 PE=2 SV=1//1.32539e-47
Csa7M008990	20.0353	1.65021	3.6018	12.1409	0.0003075	0.0025758	sp|P33080|AX10A_SOYBN Auxin-induced protein X10A
Csa1M687630	129.935	10.9259	3.572	11.8927	0.0040627	0.022833	sp|F8WKW1|UGT2_GARJA 7-deoxyloganetin glucosyltransferase OS=Gardenia jasminoides GN=UGT85A24 PE=1 SV=1//0
Csa4M075200	4108.39	380.079	3.4342	10.8093	1.9849e-97	1.067e-93	G2OX1_PEA Gibberellin 2-beta-dioxygenase 1
Csa6M404200	141.13	13.0741	3.4322	10.7943	5.9e-21	6.6773e-19	sp|Q8GW32|PRE6_ARATH Transcription factor PRE6 OS=Arabidopsis thaliana GN=PRE6 PE=1 SV=1//2.1754e-31
Csa7M048070	28.5133	2.69822	3.4016	10.5678	2.3526e-05	0.00026348	-//-
Csa1M264570	139.631	13.2305	3.3997	10.5539	1.1017e-20	1.2148e-18	-//-
Csa1M045660	456.356	43.9823	3.3752	10.3762	0.010685	0.04985	sp|Q54DY9|BCS1B_DICDI Probable mitochondrial chaperone BCS1-B OS=Dictyostelium discoideum GN=bcsl1b PE=3 SV=1//2.41652e-25
Csa6M492250	123.127	12.2867	3.325	10.0213	0.0017095	0.011167	sp|Q6WNQ8|C81E8_MEDTR Cytochrome P450 81E8 OS=Medicago truncatula GN=CYP81E8 PE=2 SV=1//0
Csa2M000790	57.4782	5.89438	3.2856	9.75134	0.0024847	0.015205	-//-
Csa1M070070	14.2259	1.49382	3.2514	9.52289	0.0058131	0.030675	sp|P0CV96|NES1_FRAVE (3S,6E)-nerolidol synthase 1, chloroplastic OS=Fragaria vesca PE=1 SV=1//7.04593e-18
Csa6M504380	179.976	18.9163	3.2501	9.51432	1.2049e-10	4.0045e-09	sp|Q9SPV4|SAMT_CLABR Salicylate carboxymethyltransferase OS=Clarkia breweri GN=SAMT PE=1 SV=1//6.39452e-141
Csa1M065930	387.205	41.631	3.2174	9.30109	5.6514e-46	3.1159e-43	sp|Q8S9L6|CRK29_ARATH Cysteine-rich receptor-like protein kinase 29 OS=Arabidopsis thaliana GN=CRK29 PE=2 SV=1//8.27883e-34
Csa3M042390	126.274	13.6241	3.2123	9.26827	9.1029e-18	7.4996e-16	ERF25_ARATH Ethylene-responsive transcription factor ERF025
Csa5M605030	67.8723	7.33607	3.2097	9.25158	2.2656e-10	7.133e-09	sp|Q9SWI1|PKS1_ARATH Protein PHYTOCHROME KINASE SUBSTRATE 1 OS=Arabidopsis thaliana GN=PKS1 PE=1 SV=2//6.14792e-33
Novel00055	40.009	4.40056	3.1846	9.09201	1.0059e-06	1.5395e-05	--
Csa6M497100	176.91	19.4952	3.1818	9.07439	3.1798e-23	4.2207e-21	sp|Q1PF16|BH019_ARATH Transcription factor bHLH19 OS=Arabidopsis thaliana GN=BHLH19 PE=2 SV=1//6.03488e-41
Csa3M164540	47.2553	5.24005	3.1728	9.01795	1.9647e-07	3.4516e-06	-//-
Csa7M430240	65.491	7.33607	3.1582	8.92715	6.3884e-05	0.00064462	sp|O24145|4CL1_TOBAC 4-coumarate--CoA ligase 1 OS=Nicotiana tabacum GN=4CL1 PE=2 SV=1//0
Csa2M350330	18.5368	2.09602	3.1447	8.84401	0.0014607	0.0097727	sp|Q9ZTK5|DAT_CATRO Deacetylvindoline O-acetyltransferase OS=Catharanthus roseus GN=DAT PE=1 SV=1//2.98973e-09
Csa1M145860	18.1946	2.09602	3.1178	8.68063	0.0040937	0.022984	sp|Q0WRB0|FACR5_ARATH Probable fatty acyl-CoA reductase 5 OS=Arabidopsis thaliana GN=FAR5 PE=2 SV=1//9.82854e-55
Csa1M064730	654.644	75.7174	3.112	8.6458	1.5659e-11	5.9489e-10	G2OX8_ARATH Gibberellin 2-beta-dioxygenase 8
Csa4M621720	296.239	34.2949	3.1107	8.63802	1.3522e-35	4.5432e-33	sp|H1A988|C7254_GLYUR 11-oxo-beta-amyrin 30-oxidase OS=Glycyrrhiza uralensis GN=CYP72A154 PE=1 SV=1//7.63317e-21
Csa6M486790	81.5919	9.48423	3.1048	8.60276	8.748e-12	3.5359e-10	sp|Q70II3|EF110_ARATH Ethylene-responsive transcription factor ERF110
Csa3M730800	7900.74	924.728	3.0949	8.54393	1.5862e-17	1.2494e-15	sp|Q8S8P5|WRK33_ARATH Probable WRKY transcription factor 33 OS=Arabidopsis thaliana GN=WRKY33 PE=1 SV=2//1.74956e-101
Csa2M352420	6200.37	731.267	3.0839	8.47903	7.8189e-92	2.8022e-88	sp|O82199|C3H20_ARATH Zinc finger CCCH domain-containing protein 20 OS=Arabidopsis thaliana GN=At2g19810 PE=2 SV=1//4.24509e-76
Csa5M635430	126.849	15.0137	3.0788	8.44911	1.1401e-11	4.4736e-10	sp|Q00466|HAT7_ARATH Homeobox-leucine zipper protein HAT7 OS=Arabidopsis thaliana GN=HAT7 PE=2 SV=4//4.90798e-76
Csa7M404810	17.6677	2.09602	3.0754	8.42923	0.0022735	0.014109	-//-
Csa1M534750	106.957	13.1783	3.0208	8.11618	8.0614e-07	1.2552e-05	sp|P27054|CHI4_PHAVU Endochitinase PR4 OS=Phaseolus vulgaris GN=CHI4 PE=2 SV=1//6.78047e-117
Csa7M009010	24.873	3.0919	3.008	8.04448	0.001015	0.0072198	sp|P33080|AX10A_SOYBN Auxin-induced protein X10A
Csa3M174570	59.7569	7.67762	2.9604	7.7834	1.8011e-08	3.944e-07	sp|Q9SIN9|PLA13_ARATH Phospholipase A1-Ialpha2, chloroplastic OS=Arabidopsis thaliana GN=At2g31690 PE=1 SV=1//7.80486e-164
Csa3M040850	685.429	88.5021	2.9532	7.74465	3.6743e-53	2.6336e-50	sp|Q6Q3H3|TPSGD_VITVI (-)-germacrene D synthase OS=Vitis vinifera GN=VIT_19s0014g04930 PE=1 SV=1//7.29473e-170
Csa5M605140	53.5233	7.12755	2.9087	7.50941	1.4224e-07	2.5725e-06	sp|P80022|RNLE_SOLLC Extracellular ribonuclease LE OS=Solanum lycopersicum PE=1 SV=2//6.94892e-102
Csa6M423480	19.5905	2.64609	2.8882	7.40346	0.0017987	0.011636	sp|P49252|AMO_LENCU Primary amine oxidase (Fragment) OS=Lens culinaris PE=1 SV=3//0
Csa7M009020	42.315	5.73799	2.8826	7.37478	2.9556e-06	4.1215e-05	sp|P33080|AX10A_SOYBN Auxin-induced protein X10A
Csa4M640960	153.385	20.856	2.8786	7.35436	2.6934e-05	0.000297	sp|Q9SND9|Y3028_ARATH Uncharacterized acetyltransferase At3g50280 OS=Arabidopsis thaliana GN=At3g50280 PE=3 SV=1//1.07432e-72
Csa3M592690	285.25	39.8478	2.8397	7.15871	4.266e-31	9.9709e-29	sp|Q9SYK9|U74E2_ARATH UDP-glycosyltransferase 74E2 OS=Arabidopsis thaliana GN=UGT74E2 PE=1 SV=1//9.60805e-126
Csa3M850600	142.56	20.1207	2.8248	7.08516	6.3445e-09	1.5108e-07	sp|Q9FZB1|Y5188_ARATH Probable LRR receptor-like serine/threonine-protein kinase At1g51880 OS=Arabidopsis thaliana GN=At1g51880 PE=2 SV=1//2.3736e-89
Csa4M639960	133.651	19.3855	2.7854	6.89428	0.001272	0.0087106	sp|Q9SND9|Y3028_ARATH Uncharacterized acetyltransferase At3g50280 OS=Arabidopsis thaliana GN=At3g50280 PE=3 SV=1//4.26331e-77
Csa4M618520	97.501	14.4349	2.7559	6.75474	3.7266e-12	1.5837e-10	sp|Q66PF3|UFOG3_FRAAN Putative UDP-glucose flavonoid 3-O-glucosyltransferase 3 OS=Fragaria ananassa GN=GT3 PE=2 SV=1//1.59336e-166
Csa3M775300	24.3051	3.64197	2.7385	6.67376	0.00072854	0.0054661	sp|Q9ZUX1|C94C1_ARATH Cytochrome P450 94C1 OS=Arabidopsis thaliana GN=CYP94C1 PE=2 SV=1//0
Csa2M160620	583.651	87.6158	2.7358	6.66128	6.401e-12	2.6317e-10	sp|Q9LRM7|NCED6_ARATH 9-cis-epoxycarotenoid dioxygenase NCED6, chloroplastic OS=Arabidopsis thaliana GN=NCED6 PE=2 SV=1//0
Csa5M604940	69.7541	10.6365	2.7133	6.5582	5.362e-09	1.2911e-07	sp|Q8GW32|PRE6_ARATH Transcription factor PRE6 OS=Arabidopsis thaliana GN=PRE6 PE=1 SV=1//4.58705e-30
Csa3M792070	1189.31	182.62	2.7032	6.51245	4.6211e-68	9.9368e-65	sp|Q9LMR5|FK126_ARATH F-box/kelch-repeat protein At1g15670 OS=Arabidopsis thaliana GN=At1g15670 PE=2 SV=1//6.13327e-56
Csa2M353460	282.205	43.6228	2.6936	6.46926	1.3992e-28	2.8119e-26	1-aminocyclopropane-1-carboxylate synthase,ACS
Csa6M504430	54.2349	8.38409	2.6935	6.46881	3.6448e-07	6.066e-06	sp|Q9FH76|ABAH3_ARATH Abscisic acid 8&apos;-hydroxylase 3
Csa3M435530	414.617	65.2894	2.6669	6.35063	2.3818e-38	9.1455e-36	-//-
Csa1M070080	66.2984	10.7695	2.622	6.15603	8.0854e-08	1.5468e-06	-//-
Csa5M544050	88.4893	14.3827	2.6212	6.15262	1.1737e-05	0.00014291	sp|Q9LQV2|RDR1_ARATH RNA-dependent RNA polymerase 1 OS=Arabidopsis thaliana GN=RDR1 PE=2 SV=1//0
Csa5M576840	226.424	37.2071	2.6054	6.0856	1.2191e-22	1.5512e-20	-//-
Csa2M346000	75.803	12.524	2.5976	6.05279	4.2906e-09	1.0532e-07	sp|Q9LNU3|EXP11_ARATH Expansin-A11 OS=Arabidopsis thaliana GN=EXPA11 PE=2 SV=1//2.35078e-121
Csa5M152250	84.0415	13.9369	2.5922	6.03018	4.7003e-10	1.3789e-08	-//-
Csa2M381840	70.0003	11.6324	2.5892	6.01765	1.6174e-08	3.5745e-07	IAA13_ORYSJ Auxin-responsive protein IAA13
Csa2M416170	615.319	102.363	2.5876	6.01098	8.8757e-07	1.3701e-05	sp|Q339N5|CSLH1_ORYSJ Cellulose synthase-like protein H1 OS=Oryza sativa subsp. japonica GN=CSLH1 PE=2 SV=2//0
Csa3M076020	1914.15	318.838	2.5858	6.00348	1.1879e-17	9.531e-16	sp|Q948T6|LGUL_ORYSJ Lactoylglutathione lyase OS=Oryza sativa subsp. japonica GN=GLX-I PE=1 SV=2//1.09343e-80
Csa6M516780	89.0502	14.8807	2.5812	5.98437	0.0048116	0.02626	sp|Q9LJB7|BBX32_ARATH B-box zinc finger protein 32 OS=Arabidopsis thaliana GN=BBX32 PE=1 SV=1//1.51473e-10
Csa1M294090	32.0578	5.39644	2.5706	5.94056	0.0043629	0.024279	-//-
Csa1M003480	28.007	4.74211	2.5622	5.90608	0.00043727	0.0034876	-//-
Csa2M294910	23.2514	3.98352	2.5452	5.83689	0.0019639	0.012461	sp|O23181|PLP3_ARATH Patatin-like protein 3 OS=Arabidopsis thaliana GN=PLP3 PE=2 SV=2//1.19994e-102
Csa6M424530	41.0012	7.04666	2.5407	5.81871	1.6804e-05	0.00019542	sp|Q94AZ2|STP13_ARATH Sugar transport protein 13 OS=Arabidopsis thaliana GN=STP13 PE=1 SV=2//3.79143e-06
Csa6M520490	26.1253	4.53359	2.5267	5.76252	0.00099234	0.0071009	sp|A2A1A0|NCS1_COPJA S-norcoclaurine synthase 1 OS=Coptis japonica GN=NCS1 PE=1 SV=1//1.89356e-07
Csa1M188680	1320.97	229.441	2.5254	5.75733	0.00048807	0.0038415	sp|Q8LER3|XTH7_ARATH Probable xyloglucan endotransglucosylase/hydrolase protein 7 OS=Arabidopsis thaliana GN=XTH7 PE=2 SV=2//1.91613e-158
Csa2M258750	29.8887	5.24005	2.5119	5.70371	0.00033695	0.0027899	sp|Q9FJF6|SAU23_ARATH Auxin-responsive protein SAUR23 OS=Arabidopsis thaliana GN=SAUR23 PE=2 SV=1//3.95233e-31
Csa4M290200	123.311	21.7188	2.5053	5.67767	0.00027236	0.0023213	sp|Q9LXV0|U92A1_ARATH UDP-glycosyltransferase 92A1 OS=Arabidopsis thaliana GN=UGT92A1 PE=2 SV=1//1.13583e-160
Csa2M425750	26.5906	4.68998	2.5033	5.66981	0.00079921	0.0059077	sp|P93147|C81E1_GLYEC Isoflavone 2&apos;-hydroxylase OS=Glycyrrhiza echinata GN=CYP81E1 PE=1 SV=2//1.9337e-152
Csa6M492310	2341.75	413.581	2.5013	5.66195	3.9481e-16	2.7037e-14	sp|O82333|GH31_ARATH Probable indole-3-acetic acid-amido synthetase GH3.1 OS=Arabidopsis thaliana GN=GH3.1 PE=2 SV=1//0
Csa7M378520	6841.83	1214.88	2.4936	5.63182	1.3281e-11	5.1549e-10	AUX28_SOYBN Auxin-induced protein AUX28
Csa1M050230	879.514	156.206	2.4933	5.63064	1.2339e-18	1.1196e-16	-//-
Csa1M467120	1878.47	336.868	2.4793	5.57627	1.0026e-11	3.9925e-10	sp|Q05609|CTR1_ARATH Serine/threonine-protein kinase CTR1 OS=Arabidopsis thaliana GN=CTR1 PE=1 SV=1//1.61106e-41
Csa6M366580	55.8155	10.0343	2.4757	5.56237	9.9909e-07	1.5302e-05	-//-
Csa2M350210	1145.97	206.765	2.4705	5.54236	1.3306e-19	1.3185e-17	sp|Q9FXD8|PLY5_ARATH Probable pectate lyase 5 OS=Arabidopsis thaliana GN=At1g67750 PE=2 SV=2//0
Csa3M446120	1847.86	336.124	2.4588	5.49759	7.6871e-05	0.00075859	sp|Q9XIE2|AB36G_ARATH ABC transporter G family member 36 OS=Arabidopsis thaliana GN=ABCG36 PE=1 SV=1//0
Novel00427	19.9737	3.64197	2.4553	5.48427	0.0046043	0.025327	-//-
Csa6M318680	56.4655	10.3237	2.4514	5.46947	0.0040835	0.022932	-//-
Csa7M009080	19.4263	3.58984	2.436	5.41139	0.0057012	0.030195	sp|Q9FK62|SAU24_ARATH Auxin-responsive protein SAUR24
Csa2M006880	572.525	106.897	2.4211	5.35579	1.2385e-42	5.9182e-40	sp|Q07488|BCB1_ARATH Blue copper protein OS=Arabidopsis thaliana GN=BCB PE=1 SV=2//3.26558e-22
Csa6M040610	27.2816	5.18792	2.3947	5.25868	0.0072943	0.036871	sp|Q9SFE4|ERF12_ARATH Ethylene-responsive transcription factor ERF012
Csa4M621220	1155.78	221.258	2.3851	5.2238	6.9464e-66	1.2447e-62	sp|H2DH21|C7A29_PANGI Cytochrome P450 CYP72A219 OS=Panax ginseng PE=2 SV=1//6.52258e-28
Csa3M748200	211.91	40.9533	2.3714	5.17443	3.1803e-12	1.3732e-10	sp|P20075|LEAD8_DAUCA Embryonic protein DC-8 OS=Daucus carota PE=3 SV=1//3.2642e-56
Csa4M015100	23.9014	4.68998	2.3494	5.09612	0.0025099	0.015337	sp|Q7XT99|AKR2_ORYSJ Probable aldo-keto reductase 2 OS=Oryza sativa subsp. japonica GN=Os04g0338000 PE=2 SV=2//0
Csa7M449420	38516.7	7580.67	2.3451	5.08096	1.8076e-16	1.2702e-14	sp|O24371|LOX31_SOLTU Linoleate 13S-lipoxygenase 3-1, chloroplastic OS=Solanum tuberosum GN=LOX3.1 PE=1 SV=1//0
Csa1M439830	277.654	54.7572	2.3422	5.07075	1.6566e-21	2.0012e-19	G2OX_PHACN Gibberellin 2-beta-dioxygenase
Csa4M303680	54.4128	10.8217	2.33	5.02805	9.8552e-05	0.00094185	sp|P32110|GSTX6_SOYBN Probable glutathione S-transferase OS=Glycine max GN=HSP26-A PE=2 SV=1//6.26942e-51
Csa1M033130	23.2719	4.63785	2.3271	5.01796	0.003113	0.018351	sp|Q9FUT0|GSTU9_ARATH Glutathione S-transferase U9 OS=Arabidopsis thaliana GN=GSTU9 PE=2 SV=1//6.65353e-66
Csa6M361410	1133.47	227.442	2.3172	4.98364	2.5299e-62	3.4e-59	-//-
Csa6M017030	26.0432	5.24005	2.3133	4.97019	0.0015866	0.010488	sp|Q70II3|EF110_ARATH Ethylene-responsive transcription factor ERF110
Csa6M425720	1959.22	394.225	2.3132	4.96984	3.3398e-81	8.977e-78	sp|Q9FMR3|NAC90_ARATH NAC domain-containing protein 90 OS=Arabidopsis thaliana GN=NAC090 PE=2 SV=1//6.04282e-76
Novel00126	89.8509	18.1811	2.3051	4.94202	2.8036e-09	7.177e-08	--
Csa4M098710	1233.29	249.64	2.3046	4.9403	1.8431e-29	3.8855e-27	-//-
Csa3M828430	639.384	129.919	2.2991	4.92151	2.9697e-09	7.5481e-08	sp|Q54DY9|BCS1B_DICDI Probable mitochondrial chaperone BCS1-B OS=Dictyostelium discoideum GN=bcsl1b PE=3 SV=1//3.40823e-26
Novel00113	26.2895	5.34431	2.2984	4.91912	0.0019397	0.012345	--
Csa2M369210	972.095	200.204	2.2796	4.85543	2.6962e-21	3.1509e-19	sp|Q8RXX9|ATL6_ARATH E3 ubiquitin-protein ligase ATL6 OS=Arabidopsis thaliana GN=ATL6 PE=1 SV=2//1.62524e-51
Csa6M520240	21851.7	4526.51	2.2713	4.82758	1.0904e-31	2.7583e-29	sp|Q9LMI0|TPS7_ARATH Probable alpha,alpha-trehalose-phosphate synthase [UDP-forming] 7 OS=Arabidopsis thaliana GN=TPS7 PE=1 SV=1//0
Csa5M602220	275.479	58.0864	2.2457	4.74267	4.2464e-22	5.3088e-20	-//-
Csa3M135720	620.888	132.24	2.2312	4.69524	0.00067331	0.0050979	1-aminocyclopropane-1-carboxylate oxidase homolog 1
Csa3M101810	2480.87	528.593	2.2306	4.69329	1.7644e-09	4.6667e-08	sp|Q93VY3|NAC72_ARATH NAC domain-containing protein 72 OS=Arabidopsis thaliana GN=NAC072 PE=2 SV=1//1.73897e-109
Csa4M038740	115.032	24.7064	2.2191	4.65603	7.7028e-06	9.8357e-05	sp|Q9FGY4|FB341_ARATH F-box protein At5g49610 OS=Arabidopsis thaliana GN=At5g49610 PE=1 SV=1//2.43839e-12
Csa3M732630	356.071	76.609	2.2166	4.64797	1.5301e-26	2.5705e-24	sp|Q9SR77|HBPL1_ARATH Heme-binding-like protein At3g10130, chloroplastic OS=Arabidopsis thaliana GN=At3g10130 PE=2 SV=1//3.25378e-12
Csa7M064070	52.189	11.2387	2.2153	4.64378	9.4e-06	0.00011697	-//-
Csa7M073520	3399.24	732.261	2.2148	4.64217	1.0396e-11	4.1091e-10	sp|Q9C5D0|CBSX2_ARATH CBS domain-containing protein CBSX2, chloroplastic OS=Arabidopsis thaliana GN=CBSX2 PE=1 SV=1//3.63621e-67
Csa2M200420	2420.73	524.642	2.206	4.61394	3.0551e-11	1.1041e-09	IAA14_ARATH Auxin-responsive protein IAA14
Csa1M257870	49.4587	10.7695	2.1993	4.59256	2.795e-05	0.00030762	sp|Q9ZUI0|Y2241_ARATH Putative leucine-rich repeat receptor-like serine/threonine-protein kinase At2g24130 OS=Arabidopsis thaliana GN=At2g24130 PE=3 SV=1//0
Csa1M042350	56.445	12.3388	2.1936	4.57446	0.00622	0.032416	sp|Q9LK95|MYB21_ARATH Transcription factor MYB21 OS=Arabidopsis thaliana GN=MYB21 PE=1 SV=1//3.12792e-34
Csa6M094170	320.51	70.2976	2.1888	4.55926	6.7977e-24	9.4444e-22	-//-
Csa7M440550	749.011	164.3	2.1887	4.55894	2.0436e-44	1.0718e-41	AUX22_SOYBN Auxin-induced protein AUX22
Csa3M827220	299.079	65.7928	2.1845	4.54569	0.0003005	0.0025261	-//-
Novel00391	289.198	63.9286	2.1775	4.52369	2.3301e-06	3.3138e-05	-//-
Csa1M633420	28.6365	6.34019	2.1753	4.5168	0.0014782	0.0098558	sp|Q84TG3|PUB23_ARATH E3 ubiquitin-protein ligase PUB23 OS=Arabidopsis thaliana GN=PUB23 PE=1 SV=1//5.34539e-84
Csa6M485160	228.004	50.7216	2.1684	4.49525	2.6813e-18	2.3342e-16	sp|Q9FGG3|WTR45_ARATH WAT1-related protein At5g64700 OS=Arabidopsis thaliana GN=At5g64700 PE=2 SV=1//3.86854e-93
Csa6M504450	119.541	26.7503	2.1599	4.46884	1.2018e-10	4.0004e-09	sp|Q9P6Q3|BCS1_SCHPO Probable mitochondrial chaperone bcs1 OS=Schizosaccharomyces pombe (strain 972 / ATCC 24843) GN=SPAC644.07 PE=2 SV=1//1.43392e-31
Csa6M517220	6317.88	1421.64	2.1519	4.44413	1.223e-39	5.1566e-37	sp|P24805|TSJT1_TOBAC Stem-specific protein TSJT1 OS=Nicotiana tabacum GN=TSJT1 PE=2 SV=1//4.58417e-27
Csa3M859620	232.951	52.6612	2.1452	4.42354	2.7517e-15	1.72e-13	sp|F4HQX1|JAL3_ARATH Jacalin-related lectin 3 OS=Arabidopsis thaliana GN=JAL3 PE=2 SV=1//3.45209e-16
Csa5M155560	25.3178	5.73799	2.1415	4.41221	0.0034606	0.02003	ERF26_ARATH Ethylene-responsive transcription factor ERF026
Csa3M510960	404.688	92.011	2.1369	4.39816	5.8657e-10	1.6953e-08	sp|P46604|HAT22_ARATH Homeobox-leucine zipper protein HAT22 OS=Arabidopsis thaliana GN=HAT22 PE=1 SV=1//1.40891e-71
Csa2M418950	238.815	54.3456	2.1357	4.3945	1.7209e-17	1.3407e-15	sp|P87027|SPG1_SCHPO Septum-promoting GTP-binding protein 1 OS=Schizosaccharomyces pombe (strain 972 / ATCC 24843) GN=spg1 PE=1 SV=1//1.81875e-54
Csa3M827930	190.178	43.4088	2.1313	4.38112	0.0012636	0.0086617	-//-
Csa1M575060	216.768	49.6502	2.1263	4.36596	3.8322e-05	0.00040673	-//-
Csa7M045590	152.995	35.2153	2.1192	4.34453	3.2691e-10	9.9567e-09	sp|Q7XBH4|MYB4_ORYSJ Myb-related protein Myb4 OS=Oryza sativa subsp. japonica GN=MYB4 PE=2 SV=2//1.49506e-46
Csa2M351800	4607.84	1062.53	2.1166	4.33671	3.9025e-14	2.1083e-12	sp|P42044|HEMH_CUCSA Ferrochelatase-2, chloroplastic OS=Cucumis sativus GN=HEMH PE=2 SV=1//0
Csa7M337100	20.5416	4.74211	2.1149	4.3316	0.0092191	0.044448	sp|P07730|GLUA2_ORYSJ Glutelin type-A 2 OS=Oryza sativa subsp. japonica GN=GLUA2 PE=1 SV=1//1.17175e-18
Csa4M045040	182.261	42.1343	2.1129	4.3256	4.7877e-05	0.00049686	-//-
Csa4M051480	181.72	42.2098	2.1061	4.30526	1.7611e-14	9.8875e-13	-//-
Csa6M504440	268.198	62.5391	2.1005	4.28858	7.9042e-20	7.9423e-18	sp|Q9P6Q3|BCS1_SCHPO Probable mitochondrial chaperone bcs1 OS=Schizosaccharomyces pombe (strain 972 / ATCC 24843) GN=SPAC644.07 PE=2 SV=1//1.18612e-30
Csa7M419590	437.684	102.056	2.1005	4.28858	2.0635e-12	9.2058e-11	sp|Q39PS9|TOLB_GEOMG Protein TolB OS=Geobacter metallireducens (strain GS-15 / ATCC 53774 / DSM 7210) GN=tolB PE=3 SV=1//1.09074e-11
Csa2M010200	162.246	37.8848	2.0985	4.28264	4.2777e-06	5.7736e-05	sp|Q9C7A2|Y3236_ARATH Ankyrin repeat-containing protein At3g12360 OS=Arabidopsis thaliana GN=At3g12360 PE=2 SV=1//5.85114e-23
Csa6M040640	229.29	53.9752	2.0868	4.24805	1.0167e-09	2.8064e-08	sp|Q9LK95|MYB21_ARATH Transcription factor MYB21 OS=Arabidopsis thaliana GN=MYB21 PE=1 SV=1//1.92669e-58
Csa5M638340	700.134	164.85	2.0865	4.24716	1.2208e-39	5.1566e-37	sp|Q3B561|Y637_PELLD UPF0301 protein Plut_0637 OS=Pelodictyon luteolum (strain DSM 273) GN=Plut_0637 PE=3 SV=1//3.53366e-11
Csa3M116790	504.18	118.819	2.0852	4.24334	1.7105e-31	4.2278e-29	sp|Q41001|BCP_PEA Blue copper protein OS=Pisum sativum PE=2 SV=1//7.83684e-27
Novel00034	199.196	47.2126	2.0769	4.219	3.0825e-12	1.3363e-10	-//-
Csa4M025190	252.692	59.9685	2.0751	4.21374	0.00038606	0.0031362	sp|Q7XJE6|MCA1_ARATH Metacaspase-1 OS=Arabidopsis thaliana GN=AMC1 PE=1 SV=1//1.11907e-09
Csa3M728650	29.0197	6.89026	2.0744	4.21169	0.0018797	0.012052	sp|Q5R7E4|S47A2_PONAB Multidrug and toxin extrusion protein 2 OS=Pongo abelii GN=SLC47A2 PE=2 SV=1//2.95294e-57
Csa7M428890	963.479	228.813	2.0741	4.21082	3.4479e-06	4.7496e-05	sp|Q66GR3|BH130_ARATH Transcription factor bHLH130 OS=Arabidopsis thaliana GN=BHLH130 PE=1 SV=1//7.91319e-52
Csa6M169310	94.0454	22.454	2.0664	4.1884	3.8177e-05	0.00040539	sp|Q94J16|HFA4B_ORYSJ Heat stress transcription factor A-4b OS=Oryza sativa subsp. japonica GN=HSFA4B PE=2 SV=1//4.65521e-62
Csa7M428900	26.2895	6.28806	2.0638	4.18086	0.0036067	0.020687	sp|P50699|TLPH_ARATH Thaumatin-like protein OS=Arabidopsis thaliana GN=At1g18250 PE=2 SV=2//1.15961e-83
Csa6M500640	197.801	47.5254	2.0573	4.16207	6.9607e-10	1.9825e-08	sp|P14133|ASO_CUCSA L-ascorbate oxidase OS=Cucumis sativus PE=1 SV=1//1.08521e-14
Csa3M000690	23.8808	5.73799	2.0572	4.16178	0.0058978	0.03103	sp|O14197|YDQ4_SCHPO Uncharacterized transporter C5D6.04 OS=Schizosaccharomyces pombe (strain 972 / ATCC 24843) GN=SPAC5D6.04 PE=3 SV=1//7.25601e-08
Csa7M433340	108.873	26.2003	2.055	4.15544	2.7319e-09	7.0101e-08	sp|O81906|B120_ARATH G-type lectin S-receptor-like serine/threonine-protein kinase B120 OS=Arabidopsis thaliana GN=B120 PE=2 SV=1//8.28757e-20
Csa3M624020	1268.89	308.167	2.0418	4.11759	1.2316e-54	1.1034e-51	sp|Q9M8Z8|PLY8_ARATH Probable pectate lyase 8 OS=Arabidopsis thaliana GN=At3g07010 PE=2 SV=1//0
Csa6M398210	40.618	9.93004	2.0322	4.09028	0.0011922	0.0082749	-//-
Csa3M146330	154.979	37.9369	2.0304	4.08518	8.0262e-08	1.5396e-06	sp|Q8LPG9|IQD14_ARATH Protein IQ-DOMAIN 14 OS=Arabidopsis thaliana GN=IQD14 PE=1 SV=1//1.57404e-13
Csa2M401240	84.8352	20.856	2.0242	4.06766	2.0684e-07	3.619e-06	ERF19_ARATH Ethylene-responsive transcription factor ERF019
Csa1M384030	328.187	80.9053	2.0202	4.0564	1.288e-16	9.2322e-15	sp|Q94BT9|ATOX1_ARATH Copper transport protein ATX1 OS=Arabidopsis thaliana GN=ATX1 PE=1 SV=1//2.9791e-08
Csa1M573650	387.848	96.9958	1.9995	3.99861	1.7978e-13	9.0407e-12	sp|Q99090|CPRF2_PETCR Light-inducible protein CPRF2 OS=Petroselinum crispum GN=CPRF2 PE=2 SV=2//2.51682e-88
Csa1M168880	881.697	220.76	1.9978	3.9939	4.7466e-43	2.3197e-40	sp|Q94KL7|SILD_FORIN Secoisolariciresinol dehydrogenase (Fragment) OS=Forsythia intermedia PE=1 SV=1//1.92478e-92
Csa7M433330	246.13	61.6762	1.9966	3.99058	4.0414e-07	6.649e-06	sp|Q9LW83|CE101_ARATH G-type lectin S-receptor-like serine/threonine-protein kinase CES101 OS=Arabidopsis thaliana GN=CES101 PE=2 SV=2//2.94097e-67
Csa3M859670	841.728	211.091	1.9955	3.98754	4.1336e-15	2.5038e-13	-//-
Csa3M852600	146.043	36.7091	1.9922	3.97843	4.811e-10	1.4094e-08	sp|O49858|C82A3_SOYBN Cytochrome P450 82A3 OS=Glycine max GN=CYP82A3 PE=2 SV=1//8.01619e-164
Csa4M006160	106.157	26.6982	1.9914	3.97623	1.2017e-08	2.7374e-07	sp|Q949X0|ADS3_ARATH Palmitoyl-monogalactosyldiacylglycerol delta-7 desaturase, chloroplastic OS=Arabidopsis thaliana GN=ADS3 PE=2 SV=2//4.2761e-123
Csa3M730790	329.706	83.0301	1.9895	3.97099	7.8905e-14	4.1383e-12	sp|D7LBN4|CSPLH_ARALL CASP-like protein 4B1 OS=Arabidopsis lyrata subsp. lyrata GN=ARALYDRAFT_321547 PE=3 SV=1//1.36357e-49
Csa4M016460	1680.19	424.976	1.9832	3.95369	1.5153e-59	1.5516e-56	sp|Q7XA40|RGA3_SOLBU Putative disease resistance protein RGA3 OS=Solanum bulbocastanum GN=RGA3 PE=2 SV=2//6.13515e-76
Csa6M011040	1451.59	368.884	1.9764	3.9351	1.7589e-19	1.7191e-17	sp|Q9FEL8|LAX1_MEDTR Auxin transporter-like protein 1
Csa5M366670	11662.6	2972.09	1.9723	3.92393	6.3689e-29	1.3043e-26	sp|Q93ZC5|AOC4_ARATH Allene oxide cyclase 4, chloroplastic OS=Arabidopsis thaliana GN=AOC4 PE=2 SV=1//1.0732e-72
Csa4M642520	23186.8	5920.25	1.9696	3.9166	1.2985e-33	3.7111e-31	sp|Q37145|ACA1_ARATH Calcium-transporting ATPase 1, chloroplastic OS=Arabidopsis thaliana GN=ACA1 PE=1 SV=3//0
Csa6M444970	108.613	27.775	1.9673	3.91036	1.3488e-08	3.037e-07	-//-
Csa7M169070	22.4028	5.73799	1.9651	3.9044	0.0099686	0.047239	sp|Q58FS3|RAD_ANTMA Transcription factor RADIALIS OS=Antirrhinum majus GN=RAD PE=1 SV=1//5.5182e-30
Csa2M431070	8313.31	2129.84	1.9647	3.90332	1.0194e-93	4.3841e-90	sp|Q8GT20|BEBT_TOBAC Benzyl alcohol O-benzoyltransferase OS=Nicotiana tabacum GN=HSR201 PE=1 SV=1//0
Csa2M377980	291.257	74.8258	1.9607	3.89251	3.8475e-09	9.5978e-08	sp|Q9T095|OPT6_ARATH Oligopeptide transporter 6 OS=Arabidopsis thaliana GN=OPT6 PE=2 SV=1//0
Csa4M124910	61.9055	15.9287	1.9584	3.88631	1.1156e-05	0.00013654	sp|Q96502|COL2_ARATH Zinc finger protein CONSTANS-LIKE 2 OS=Arabidopsis thaliana GN=COL2 PE=1 SV=1//2.22503e-42
Csa1M059750	488.969	126.497	1.9506	3.86535	0.00012187	0.0011374	-//-
Csa1M042190	86.0669	22.3264	1.9467	3.85492	1.1706e-06	1.7628e-05	-//-
Csa5M155500	7299.61	1899.39	1.9423	3.84318	1.2498e-15	8.1937e-14	sp|Q9CAN1|RBL2_ARATH RHOMBOID-like protein 2 OS=Arabidopsis thaliana GN=RBL2 PE=1 SV=1//3.05067e-116
Csa4M194780	120.896	31.5733	1.937	3.82909	2.9843e-09	7.5764e-08	sp|Q9SVC6|PUB22_ARATH E3 ubiquitin-protein ligase PUB22 OS=Arabidopsis thaliana GN=PUB22 PE=1 SV=1//2.91082e-129
Csa3M889870	265.625	69.5624	1.933	3.81848	0.00059715	0.0045891	-//-
Csa6M187390	4726.48	1240.25	1.9301	3.81082	6.3993e-59	6.2547e-56	-//-
Csa2M060350	139.529	36.7325	1.9254	3.79842	1.7274e-10	5.5604e-09	sp|Q9SUM5|Y4318_ARATH Uncharacterized protein At4g30180 OS=Arabidopsis thaliana GN=At4g30180 PE=2 SV=1//1.42573e-11
Csa6M361330	75.6455	19.9643	1.9218	3.78895	1.9805e-06	2.8528e-05	sp|Q84QC2|ERF17_ARATH Ethylene-responsive transcription factor ERF017
Csa6M515500	309.917	81.9588	1.9189	3.78135	7.3465e-08	1.4219e-06	sp|Q9T0J1|CRK26_ARATH Cysteine-rich receptor-like protein kinase 26 OS=Arabidopsis thaliana GN=CRK26 PE=2 SV=1//1.10431e-47
Csa4M016430	41.1791	10.9259	1.9142	3.76905	0.00048157	0.0037959	sp|Q7XA42|RGA1_SOLBU Putative disease resistance protein RGA1 OS=Solanum bulbocastanum GN=RGA1 PE=2 SV=2//9.19141e-105
Csa1M541380	35.1097	9.32783	1.9123	3.76409	0.0013768	0.0093072	sp|A6P6V9|CBDAS_CANSA Cannabidiolic acid synthase OS=Cannabis sativa GN=CBDAS PE=1 SV=1//1.93812e-63
Csa3M199590	26.1253	6.9424	1.9119	3.76304	0.0052708	0.028349	sp|Q9FDW1|MYB44_ARATH Transcription factor MYB44 OS=Arabidopsis thaliana GN=MYB44 PE=2 SV=1//7.04064e-52
Csa2M433910	156.348	41.6022	1.91	3.75809	1.4811e-11	5.6974e-10	sp|Q9M9M4|CSLD3_ARATH Cellulose synthase-like protein D3 OS=Arabidopsis thaliana GN=CSLD3 PE=1 SV=1//0
Csa2M020860	414.61	110.487	1.9079	3.75262	4.5212e-24	6.4383e-22	TIR-NBS-LRR disease resistance protein
Csa6M014540	2174.38	581.004	1.904	3.74249	1.2511e-53	9.9773e-51	sp|O22874|EXPA8_ARATH Expansin-A8 OS=Arabidopsis thaliana GN=EXPA8 PE=2 SV=1//3.22445e-120
Csa3M881760	26.1253	6.99453	1.9011	3.73498	0.0052446	0.02825	sp|Q9FLV4|Y5248_ARATH G-type lectin S-receptor-like serine/threonine-protein kinase At5g24080 OS=Arabidopsis thaliana GN=At5g24080 PE=2 SV=1//2.41645e-70
Csa2M174660	27.1995	7.28394	1.9008	3.7342	0.0054128	0.028967	myb-related transcription factor
Csa1M264530	2226.36	596.352	1.9005	3.73343	1.1585e-62	1.6607e-59	-//-
Csa7M432470	2332.6	627.007	1.8954	3.72025	9.0943e-05	0.00087772	sp|P29602|CPC_CUCSA Cucumber peeling cupredoxin OS=Cucumis sativus PE=1 SV=3//1.3721e-74
Novel00379	31.7294	8.54048	1.8934	3.7151	0.0021045	0.013201	--
Csa3M651750	1689.83	455.194	1.8923	3.71227	1.2128e-13	6.1799e-12	sp|P93194|RPK1_IPONI Receptor-like protein kinase OS=Ipomoea nil GN=INRPK1 PE=2 SV=2//0
Csa1M294030	23.3129	6.28806	1.8904	3.70738	0.010182	0.047984	sp|O81776|GLR24_ARATH Glutamate receptor 2.4 OS=Arabidopsis thaliana GN=GLR2.4 PE=2 SV=2//7.47625e-63
Csa6M423990	2746.46	741.948	1.8882	3.70173	6.2016e-15	3.6838e-13	sp|Q09893|YAI5_SCHPO Uncharacterized protein C24B11.05 OS=Schizosaccharomyces pombe (strain 972 / ATCC 24843) GN=SPAC24B11.05 PE=3 SV=1//3.81043e-15
Csa3M845500	13250.1	3584.92	1.886	3.69609	8.7597e-15	5.0771e-13	sp|Q2HXL0|RBOHC_SOLTU Respiratory burst oxidase homolog protein C OS=Solanum tuberosum GN=RBOHC PE=1 SV=2//0
Csa2M020870	2013.18	545.909	1.8827	3.68765	1.024e-10	3.4513e-09	sp|Q40392|TMVRN_NICGU TMV resistance protein N OS=Nicotiana glutinosa GN=N PE=1 SV=1//1.72925e-111
Csa5M181480	14361.5	3898.34	1.8813	3.68407	9.9603e-35	3.1967e-32	sp|P52409|E13B_WHEAT Glucan endo-1,3-beta-glucosidase OS=Triticum aestivum GN=GLC1 PE=2 SV=1//4.81299e-142
Csa7M413380	64.1499	17.4225	1.8805	3.68203	1.4722e-05	0.0001747	G2OX2_PEA Gibberellin 2-beta-dioxygenase 2
Csa3M710780	1772.75	482.328	1.8779	3.6754	6.0857e-32	1.5579e-29	sp|Q9SAG8|DNAJ8_ARATH Chaperone protein dnaJ 8, chloroplastic OS=Arabidopsis thaliana GN=ATJ8 PE=2 SV=1//1.73924e-30
Csa6M495000	945.997	257.962	1.8747	3.66725	1.6444e-35	5.44e-33	sp|Q43873|PER73_ARATH Peroxidase 73 OS=Arabidopsis thaliana GN=PER73 PE=1 SV=1//4.81055e-171
Csa7M061710	197.93	54.1784	1.8692	3.6533	0.0050368	0.027274	sp|Q9XIV8|PERN1_TOBAC Peroxidase N1 OS=Nicotiana tabacum GN=poxN1 PE=1 SV=1//1.71369e-155
Csa3M116720	412.94	113.376	1.8648	3.64217	3.068e-13	1.5096e-11	ERF99_ARATH Ethylene-responsive transcription factor 13
Csa2M035350	81.8724	22.5062	1.8631	3.63789	0.00017042	0.001532	sp|Q8LPH6|MYB86_ARATH Transcription factor MYB86 OS=Arabidopsis thaliana GN=MYB86 PE=2 SV=1//3.63463e-44
Csa5M601620	418.798	115.234	1.8617	3.63436	2.2228e-06	3.1737e-05	sp|O80742|PUB19_ARATH U-box domain-containing protein 19 OS=Arabidopsis thaliana GN=PUB19 PE=2 SV=1//1.27896e-165
Csa7M073450	994.134	273.82	1.8602	3.63058	0.0086225	0.042148	sp|Q9AT54|SCGT_TOBAC Scopoletin glucosyltransferase OS=Nicotiana tabacum GN=TOGT1 PE=1 SV=1//0
Csa3M710790	2803.73	774.622	1.8558	3.61952	1.3867e-07	2.5162e-06	sp|Q9SAG8|DNAJ8_ARATH Chaperone protein dnaJ 8, chloroplastic OS=Arabidopsis thaliana GN=ATJ8 PE=2 SV=1//6.05868e-28
Csa4M343590	93.2106	25.8066	1.8528	3.61201	2.8834e-07	4.8908e-06	CKX1_ARATH Cytokinin dehydrogenase 1
Csa2M354940	37.2582	10.3237	1.8516	3.609	0.0018141	0.011711	sp|C0LGP4|Y3475_ARATH Probable LRR receptor-like serine/threonine-protein kinase At3g47570 OS=Arabidopsis thaliana GN=At3g47570 PE=2 SV=1//0
Csa6M008740	1919.95	532.041	1.8515	3.60875	3.0133e-56	2.8172e-53	sp|Q9LZM4|WAKLQ_ARATH Wall-associated receptor kinase-like 20 OS=Arabidopsis thaliana GN=WAKL20 PE=2 SV=1//0
Csa4M056740	169.541	47.0796	1.8485	3.60126	1.0235e-11	4.0604e-10	-//-
Csa3M135080	320.25	88.9946	1.8474	3.59851	2.7714e-11	1.0096e-09	sp|Q494P0|PHT17_ARATH Probable inorganic phosphate transporter 1-7 OS=Arabidopsis thaliana GN=PHT1-7 PE=2 SV=2//0
Csa6M483320	5737.53	1596.63	1.8454	3.59353	3.7878e-32	9.9329e-30	sp|Q9CAD5|YODA_ARATH Mitogen-activated protein kinase kinase kinase YODA OS=Arabidopsis thaliana GN=YDA PE=1 SV=1//1.01124e-125
Csa2M354950	370.304	103.365	1.841	3.58258	8.1826e-10	2.291e-08	sp|C0LGP4|Y3475_ARATH Probable LRR receptor-like serine/threonine-protein kinase At3g47570 OS=Arabidopsis thaliana GN=At3g47570 PE=2 SV=1//0
Csa2M381700	47.1322	13.1783	1.8385	3.57638	0.00026959	0.0022993	sp|Q9SD53|Y3720_ARATH UPF0481 protein At3g47200 OS=Arabidopsis thaliana GN=At3g47200 PE=2 SV=1//7.59757e-22
Csa6M501230	2333.47	654.397	1.8342	3.56574	6.818e-60	8.1448e-57	-//-
Csa1M589650	912.447	256.074	1.8332	3.56327	0.00021567	0.0018859	Calmodulin binding protein
Csa6M500540	2320.24	653.286	1.8285	3.55168	8.5867e-60	9.7178e-57	sp|Q5HZ05|TPPJ_ARATH Probable trehalose-phosphate phosphatase J OS=Arabidopsis thaliana GN=TPPJ PE=1 SV=1//6.28528e-171
Csa1M540370	745.179	210.337	1.8249	3.54282	1.3289e-33	3.7111e-31	sp|A6P6V9|CBDAS_CANSA Cannabidiolic acid synthase OS=Cannabis sativa GN=CBDAS PE=1 SV=1//1.22556e-52
Csa1M568480	47.0296	13.3347	1.8184	3.5269	0.00026837	0.0022909	-//-
Csa7M420830	908.533	258.28	1.8146	3.51762	5.6788e-13	2.6897e-11	sp|Q0WRX3|SCP40_ARATH Serine carboxypeptidase-like 40 OS=Arabidopsis thaliana GN=SCPL40 PE=2 SV=2//0
Csa3M182150	109.982	31.3594	1.8103	3.50715	1.173e-06	1.7638e-05	-//-
Csa7M041870	14362.4	4099.45	1.8088	3.50351	1.5179e-17	1.1999e-15	sp|Q9FGK4|B561J_ARATH Cytochrome b561 and DOMON domain-containing protein At5g47530 OS=Arabidopsis thaliana GN=At5g47530 PE=2 SV=1//4.86611e-134
Csa3M143510	1583.92	453.893	1.8031	3.48969	1.6873e-09	4.4847e-08	-//-
Csa6M507370	2743.47	786.191	1.8031	3.48969	1.0958e-08	2.504e-07	sp|Q38853|STR15_ARATH Rhodanese-like domain-containing protein 15, chloroplastic OS=Arabidopsis thaliana GN=STR15 PE=2 SV=1//3.23355e-36
Csa3M813300	161.288	46.5061	1.7941	3.46799	1.2012e-10	4.0004e-09	sp|A4II73|OVCA2_XENTR Ovarian cancer-associated gene 2 protein homolog OS=Xenopus tropicalis GN=ovca2 PE=2 SV=2//3.39078e-15
Novel00402	1230.54	354.927	1.7937	3.46703	4.484e-38	1.6916e-35	-//-
Csa6M513530	1169.08	337.251	1.7935	3.46655	9.9921e-20	9.9935e-18	sp|Q93WT0|WRK31_ARATH Probable WRKY transcription factor 31 OS=Arabidopsis thaliana GN=WRKY31 PE=2 SV=1//4.69054e-67
Csa1M435720	194.981	56.2564	1.7932	3.46583	3.5694e-12	1.5291e-10	sp|O64687|TIF5B_ARATH Protein TIFY 5B OS=Arabidopsis thaliana GN=TIFY 5B PE=2 SV=1//1.43526e-11
Csa4M622230	122.059	35.2387	1.7924	3.46391	0.00062185	0.0047567	sp|H2DH21|C7A29_PANGI Cytochrome P450 CYP72A219 OS=Panax ginseng PE=2 SV=1//5.39354e-55
Csa1M064170	1263.56	365.263	1.7905	3.45935	4.4593e-44	2.2831e-41	sp|O50046|TRPB_CAMAC Tryptophan synthase beta chain 2, chloroplastic OS=Camptotheca acuminata GN=TSB PE=2 SV=1//0
Csa1M165230	25.7215	7.44034	1.7895	3.45695	0.0087399	0.042587	sp|Q9FMR3|NAC90_ARATH NAC domain-containing protein 90 OS=Arabidopsis thaliana GN=NAC090 PE=2 SV=1//8.04554e-74
Csa3M017020	179.319	52.2909	1.7779	3.42927	6.8311e-10	1.9481e-08	sp|O23553|BAM3_ARATH Beta-amylase 3, chloroplastic OS=Arabidopsis thaliana GN=BAM3 PE=1 SV=3//0
Csa4M064690	1748.74	510.953	1.7751	3.42262	3.9474e-13	1.9032e-11	sp|Q9LRR7|NCED3_ARATH 9-cis-epoxycarotenoid dioxygenase NCED3, chloroplastic OS=Arabidopsis thaliana GN=NCED3 PE=2 SV=1//0
Csa2M264570	2558.61	748.046	1.7742	3.42048	1.2884e-53	9.9773e-51	sp|Q9FYB5|DNJ11_ARATH Chaperone protein dnaJ 11, chloroplastic OS=Arabidopsis thaliana GN=ATJ11 PE=1 SV=2//1.79321e-25
Csa2M074190	2257.05	660.428	1.773	3.41764	4.4163e-07	7.2381e-06	sp|Q9M1Q9|AB21B_ARATH ABC transporter B family member 21 OS=Arabidopsis thaliana GN=ABCB21 PE=1 SV=2//0
Csa5M648650	86.149	25.2565	1.7702	3.41101	1.8665e-06	2.7101e-05	sp|Q40392|TMVRN_NICGU TMV resistance protein N OS=Nicotiana glutinosa GN=N PE=1 SV=1//8.9615e-78
Csa7M071440	373.965	109.861	1.7672	3.40393	6.5019e-13	3.0728e-11	sp|Q96289|ZAT10_ARATH Zinc finger protein ZAT10 OS=Arabidopsis thaliana GN=ZAT10 PE=2 SV=1//1.30276e-31
Csa1M025960	8072.24	2378.81	1.7627	3.39333	2.4943e-07	4.3045e-06	sp|Q8S8P5|WRK33_ARATH Probable WRKY transcription factor 33 OS=Arabidopsis thaliana GN=WRKY33 PE=1 SV=2//1.99301e-108
Csa2M258780	40.9806	12.0782	1.7625	3.39286	0.0010525	0.0074447	sp|Q9FJF9|SAU21_ARATH Auxin-responsive protein SAUR21 OS=Arabidopsis thaliana GN=SAUR21 PE=2 SV=1//1.86973e-30
Csa5M224130	1403.74	413.998	1.7616	3.39074	1.092e-07	2.0347e-06	sp|Q93Z79|C14A1_ARATH Cytochrome P450 714A1 OS=Arabidopsis thaliana GN=CYP714A1 PE=2 SV=1//0
Csa7M037610	98.1921	28.974	1.7608	3.38886	0.00015155	0.001379	-//-
Csa1M574960	926.652	274.394	1.7558	3.37714	0.00017273	0.0015496	sp|P47735|RLK5_ARATH Receptor-like protein kinase 5 OS=Arabidopsis thaliana GN=RLK5 PE=1 SV=1//0
Csa6M384060	662.835	196.719	1.7525	3.36942	3.8339e-17	2.8625e-15	sp|Q8VYX0|ILL6_ARATH IAA-amino acid hydrolase ILR1-like 6
Csa3M009510	2322.71	690.012	1.7511	3.36615	1.9527e-06	2.8257e-05	-//-
Csa6M497110	289.992	86.1508	1.7511	3.36615	4.0506e-16	2.7651e-14	sp|Q1PF16|BH019_ARATH Transcription factor bHLH19 OS=Arabidopsis thaliana GN=BHLH19 PE=2 SV=1//1.17371e-43
Csa4M618490	270.613	80.5872	1.7476	3.35799	2.458e-08	5.2331e-07	sp|O23039|ZIP5_ARATH Zinc transporter 5 OS=Arabidopsis thaliana GN=ZIP5 PE=2 SV=1//1.49867e-103
Csa1M001440	26.57	7.93828	1.7429	3.34707	0.0088789	0.043108	-//-
Csa7M043020	48.4665	14.487	1.7422	3.34545	0.00031946	0.0026636	sp|Q9C519|WRKY6_ARATH WRKY transcription factor 6 OS=Arabidopsis thaliana GN=WRKY6 PE=1 SV=1//8.37093e-99
Csa2M177210	461.934	139.576	1.7266	3.30947	0.0014821	0.009873	ERF92_ARATH Ethylene-responsive transcription factor 1B
Csa7M284420	835.372	252.628	1.7254	3.30672	1.5493e-16	1.1032e-14	sp|O22938|PXC3_ARATH Leucine-rich repeat receptor-like tyrosine-protein kinase PXC3 OS=Arabidopsis thaliana GN=PXC3 PE=2 SV=1//2.71015e-51
Csa3M828930	429.069	130.162	1.7209	3.29642	5.3238e-17	3.9611e-15	-//-
Csa6M091930	559.941	172.32	1.7002	3.24946	3.9342e-25	5.9576e-23	sp|Q93ZM9|TIF9_ARATH Protein TIFY 9, JAZ10 (JASMONATE-ZIM-DOMAIN PROTEIN 10)
Csa6M515490	410.354	126.369	1.6992	3.24721	6.6236e-09	1.5703e-07	sp|Q9T0J1|CRK26_ARATH Cysteine-rich receptor-like protein kinase 26 OS=Arabidopsis thaliana GN=CRK26 PE=2 SV=1//1.02198e-34
Csa1M479630	4818.26	1486.17	1.6969	3.24204	6.0332e-12	2.4853e-10	sp|Q39023|MPK3_ARATH Mitogen-activated protein kinase 3 OS=Arabidopsis thaliana GN=MPK3 PE=1 SV=2//0
Csa2M032750	41.9728	13.0219	1.6885	3.22321	0.0014339	0.0096201	sp|Q9M9W8|PLDP2_ARATH Phospholipase D p2 OS=Arabidopsis thaliana GN=PLDP2 PE=2 SV=2//0
Csa2M433930	1537.73	477.246	1.688	3.2221	0.0032055	0.018792	sp|Q76CU2|PDR1_TOBAC Pleiotropic drug resistance protein 1 OS=Nicotiana tabacum GN=PDR1 PE=2 SV=1//0
Csa1M005550	107.97	33.6172	1.6834	3.21184	0.0031402	0.018489	-//-
Csa5M605080	52.1136	16.2702	1.6794	3.20295	0.0082037	0.040506	sp|Q9LXG0|ZHD8_ARATH Zinc-finger homeodomain protein 8 OS=Arabidopsis thaliana GN=ZHD8 PE=1 SV=1//5.88508e-40
Csa6M151790	78.4374	24.4979	1.6789	3.20184	1.3656e-05	0.0001633	sp|Q93ZB9|FACR3_ARATH Fatty acyl-CoA reductase 3 OS=Arabidopsis thaliana GN=FAR3 PE=2 SV=1//2.04272e-07
Csa1M042520	398.776	124.737	1.6767	3.19696	1.6327e-10	5.2714e-09	sp|P0C5E2|Y1839_ARATH Probable serine/threonine-protein kinase At1g18390 OS=Arabidopsis thaliana GN=At1g18390 PE=2 SV=2//8.23188e-163
Csa7M449460	3205.73	1007.24	1.6702	3.18259	1.7596e-12	7.9321e-11	sp|Q9SYH1|RSH3C_ARATH Probable GTP diphosphokinase RSH3, chloroplastic OS=Arabidopsis thaliana GN=RSH3 PE=2 SV=1//0
Csa5M601560	403.908	127.278	1.666	3.17334	0.00040128	0.0032305	sp|P27141|CAHC_TOBAC Carbonic anhydrase, chloroplastic OS=Nicotiana tabacum PE=2 SV=1//4.58936e-130
Csa1M570140	59.7569	18.8642	1.6635	3.16784	0.00014424	0.0013215	sp|Q5KS50|NPH3_ORYSJ Coleoptile phototropism protein 1 OS=Oryza sativa subsp. japonica GN=CPT1 PE=2 SV=1//1.51138e-96
Csa4M314440	517.229	163.651	1.6602	3.1606	6.3366e-08	1.2466e-06	sp|P81748|MIFH_TRITR Macrophage migration inhibitory factor homolog OS=Trichuris trichiura PE=1 SV=2//2.88162e-13
Csa6M499160	68.0365	21.5624	1.6578	3.15535	5.3073e-05	0.00054553	sp|Q9LYT3|TT12_ARATH Protein TRANSPARENT TESTA 12 OS=Arabidopsis thaliana GN=TT12 PE=2 SV=1//6.3066e-95
Csa3M914590	89.5498	28.4005	1.6568	3.15316	3.9645e-06	5.3819e-05	sp|Q9FFA7|RUP2_ARATH WD repeat-containing protein RUP2 OS=Arabidopsis thaliana GN=RUP2 PE=1 SV=1//4.04262e-135
Csa3M849900	1634.7	518.794	1.6558	3.15098	3.7598e-40	1.6499e-37	sp|Q9C5V5|GLR28_ARATH Glutamate receptor 2.8 OS=Arabidopsis thaliana GN=GLR2.8 PE=2 SV=2//5.82121e-16
Csa4M303160	3934.79	1248.91	1.6556	3.15054	2.0845e-14	1.1567e-12	sp|Q9SR36|GSTU8_ARATH Glutathione S-transferase U8 OS=Arabidopsis thaliana GN=GSTU8 PE=2 SV=1//6.32028e-60
Csa4M361850	801.227	254.354	1.6554	3.15011	2.9383e-30	6.5136e-28	sp|Q0IU52|ASP1_ORYSJ Aspartic proteinase Asp1 OS=Oryza sativa subsp. japonica GN=ASP1 PE=2 SV=1//8.93062e-89
Csa2M348860	165.661	52.6612	1.6534	3.14574	7.6761e-10	2.1574e-08	-//-
Csa3M175680	330.124	105.247	1.6492	3.1366	1.7735e-16	1.2544e-14	-//-
Csa5M600380	762.668	243.347	1.648	3.13399	2.5224e-08	5.365e-07	sp|Q9CAL2|CRK3_ARATH Cysteine-rich receptor-like protein kinase 3 OS=Arabidopsis thaliana GN=CRK3 PE=2 SV=1//5.24878e-22
Csa4M056750	2793.67	892.981	1.6455	3.12856	1.2992e-53	9.9773e-51	sp|Q682S0|RPT2_ARATH Root phototropism protein 2 OS=Arabidopsis thaliana GN=RPT2 PE=1 SV=2//0
Csa1M033160	43.2251	13.8327	1.6438	3.12488	0.0012259	0.0084408	sp|Q9FUT0|GSTU9_ARATH Glutathione S-transferase U9 OS=Arabidopsis thaliana GN=GSTU9 PE=2 SV=1//2.81246e-68
Csa7M452200	2865.76	917.061	1.6438	3.12488	8.6263e-18	7.1343e-16	sp|C0LGG4|Y1518_ARATH Probable LRR receptor-like serine/threonine-protein kinase At1g51860 OS=Arabidopsis thaliana GN=At1g51860 PE=2 SV=2//0
Csa2M360800	1645.9	526.975	1.6431	3.12336	6.5385e-05	0.00065823	-//-
Csa5M155570	3279.59	1051.1	1.6416	3.12012	5.3767e-14	2.8618e-12	sp|Q9FJ93|DRE1D_ARATH Dehydration-responsive element-binding protein 1D OS=Arabidopsis thaliana GN=DREB1D PE=2 SV=1//1.01581e-46
Csa3M874370	99.848	32.0192	1.6408	3.11839	1.8973e-06	2.7492e-05	-//-
Csa1M574950	148.903	47.9191	1.6357	3.10738	6.1046e-09	1.4585e-07	sp|Q9SGP2|HSL1_ARATH Receptor-like protein kinase HSL1 OS=Arabidopsis thaliana GN=HSL1 PE=2 SV=1//1.78538e-19
Csa6M517020	94.0043	30.288	1.634	3.10372	8.0939e-05	0.00079363	sp|Q8GWA1|NDA1_ARATH Internal alternative NAD(P)H-ubiquinone oxidoreductase A1, mitochondrial OS=Arabidopsis thaliana GN=NDA1 PE=2 SV=1//5.12534e-147
Csa6M513540	337.049	108.628	1.6336	3.10286	2.0243e-16	1.4179e-14	-//-
Csa3M598910	38.5515	12.4719	1.6281	3.09106	0.0030073	0.017849	sp|Q03200|LIRP1_ORYSJ Light-regulated protein OS=Oryza sativa subsp. japonica GN=LIR1 PE=2 SV=1//1.79979e-17
Csa6M133830	1897.43	615.499	1.6242	3.08271	4.5334e-20	4.5982e-18	sp|Q8VYR0|MCU5_ARATH Calcium uniporter protein 5, mitochondrial OS=Arabidopsis thaliana GN=At1g57610 PE=2 SV=1//9.06095e-103
Csa3M588520	48.0423	15.6159	1.6213	3.07652	0.00091892	0.0066687	sp|Q8RYK0|CML31_ORYSJ Probable calcium-binding protein CML31 OS=Oryza sativa subsp. japonica GN=CML31 PE=2 SV=1//2.15972e-41
Csa7M253780	102.462	33.4608	1.6145	3.06205	9.9883e-06	0.00012336	sp|Q8VZ80|PLT5_ARATH Polyol transporter 5 OS=Arabidopsis thaliana GN=PLT5 PE=1 SV=2//0
Csa1M042530	52.2095	17.0576	1.6139	3.06078	0.00060032	0.0046103	sp|P0C5E2|Y1839_ARATH Probable serine/threonine-protein kinase At1g18390 OS=Arabidopsis thaliana GN=At1g18390 PE=2 SV=2//7.03637e-63
Csa6M525220	14488.2	4740.48	1.6118	3.05633	6.5413e-68	1.2787e-64	sp|Q9C8G5|CSCLD_ARATH CSC1-like protein ERD4 OS=Arabidopsis thaliana GN=ERD4 PE=2 SV=1//0
Csa1M600130	108.654	35.5802	1.6106	3.05379	8.3262e-07	1.2927e-05	sp|Q8W496|PTC52_ARATH Protochlorophyllide-dependent translocon component 52, chloroplastic OS=Arabidopsis thaliana GN=PTC52 PE=2 SV=1//0
Csa1M435790	2996.52	982.543	1.6087	3.04977	2.9578e-31	7.1462e-29	sp|Q8LBM2|TIF5A_ARATH Protein TIFY 5A OS=Arabidopsis thaliana GN=TIFY5A PE=1 SV=1//1.82227e-07
Csa7M049260	1820.54	596.953	1.6087	3.04977	5.5096e-13	2.6153e-11	sp|Q93YW5|P2C58_ARATH Probable protein phosphatase 2C 58 OS=Arabidopsis thaliana GN=At4g28400 PE=2 SV=1//8.33218e-135
Csa4M289120	221.9	73.0192	1.6036	3.03901	8.8714e-12	3.5723e-10	sp|Q39202|RLK1_ARATH G-type lectin S-receptor-like serine/threonine-protein kinase RLK1 OS=Arabidopsis thaliana GN=RLK1 PE=2 SV=2//1.80008e-12
Csa1M039200	241.265	79.4637	1.6023	3.03627	1.3937e-12	6.3898e-11	sp|Q9LZD3|E70A1_ARATH Exocyst complex component EXO70A1 OS=Arabidopsis thaliana GN=EXO70A1 PE=1 SV=1//2.46751e-25
Csa4M064040	964.828	317.813	1.6021	3.03585	3.8027e-06	5.1884e-05	sp|C0LGH3|Y5614_ARATH Probable LRR receptor-like serine/threonine-protein kinase At1g56140 OS=Arabidopsis thaliana GN=At1g56140 PE=2 SV=2//4.35824e-93
Csa3M134770	509.463	168.938	1.5925	3.01571	2.3341e-21	2.773e-19	sp|Q9FNL7|PTR3_ARATH Protein NRT1/ PTR FAMILY 5.2 OS=Arabidopsis thaliana GN=NPF5.2 PE=2 SV=1//0
Csa2M360780	23120.6	7680.36	1.5899	3.01028	1.1122e-14	6.3773e-13	sp|P48417|CP74_LINUS Allene oxide synthase, chloroplastic OS=Linum usitatissimum GN=CYP74A PE=1 SV=1//0
Csa5M600370	1369.8	455.086	1.5898	3.01008	2.1354e-09	5.586e-08	sp|Q9CAL2|CRK3_ARATH Cysteine-rich receptor-like protein kinase 3 OS=Arabidopsis thaliana GN=CRK3 PE=2 SV=1//0
Csa6M327430	1523.7	506.315	1.5895	3.00945	2.0006e-39	8.2728e-37	sp|Q9FGZ4|WRK48_ARATH Probable WRKY transcription factor 48 OS=Arabidopsis thaliana GN=WRKY48 PE=2 SV=1//1.52485e-43
Csa4M012390	39.6053	13.1783	1.5875	3.00528	0.0029192	0.017422	sp|Q9FYA2|WRK75_ARATH Probable WRKY transcription factor 75 OS=Arabidopsis thaliana GN=WRKY75 PE=2 SV=1//1.7668e-53
Csa4M043850	348.572	115.993	1.5874	3.00507	4.1608e-16	2.8047e-14	sp|O23208|ATB40_ARATH Homeobox-leucine zipper protein ATHB-40 OS=Arabidopsis thaliana GN=ATHB-40 PE=2 SV=3//1.3154e-41
Csa3M872740	5808.37	1933.88	1.5866	3.00341	9.635e-10	2.663e-08	sp|P83332|TLP1_PRUPE Thaumatin-like protein 1 OS=Prunus persica PE=2 SV=1//1.63679e-83
Csa1M039020	2655.76	884.311	1.5865	3.0032	1.4771e-07	2.6623e-06	sp|Q9S7P9|SNP33_ARATH SNAP25 homologous protein SNAP33 OS=Arabidopsis thaliana GN=SNAP33 PE=1 SV=1//2.7174e-94
Csa5M567300	10276.5	3422.12	1.5864	3.00299	3.2753e-52	2.2719e-49	sp|Q9CAC1|GUN8_ARATH Endoglucanase 8 OS=Arabidopsis thaliana GN=CEL1 PE=2 SV=1//0
Csa4M288620	539.208	179.598	1.5861	3.00237	1.1575e-06	1.7454e-05	sp|Q39202|RLK1_ARATH G-type lectin S-receptor-like serine/threonine-protein kinase RLK1 OS=Arabidopsis thaliana GN=RLK1 PE=2 SV=2//5.25739e-43
Csa6M517010	84.9173	28.2963	1.5854	3.00091	4.0944e-05	0.00043116	sp|O80874|NDA2_ARATH Internal alternative NAD(P)H-ubiquinone oxidoreductase A2, mitochondrial OS=Arabidopsis thaliana GN=NDA2 PE=2 SV=1//1.37757e-77
Csa5M141040	377.222	125.97	1.5823	2.99447	3.2184e-13	1.58e-11	sp|Q39547|CUCM1_CUCME Cucumisin OS=Cucumis melo PE=1 SV=1//0
Csa7M073380	7756.69	2591.64	1.5816	2.99302	6.4224e-24	9.0262e-22	sp|Q0JBH9|ERG3_ORYSJ Elicitor-responsive protein 3 OS=Oryza sativa subsp. japonica GN=ERG3 PE=2 SV=1//6.45163e-11
Csa4M304840	946.585	316.418	1.5809	2.99156	1.2327e-30	2.761e-28	sp|Q9SH93|IPCS2_ARATH Phosphatidylinositol:ceramide inositolphosphotransferase 2 OS=Arabidopsis thaliana GN=IPCS2 PE=2 SV=1//7.32598e-159
Csa6M504720	249.531	83.5568	1.5784	2.98638	3.5289e-11	1.2647e-09	sp|Q42600|C84A1_ARATH Cytochrome P450 84A1 OS=Arabidopsis thaliana GN=CYP84A1 PE=1 SV=1//0
Csa5M471600	10605.4	3556.74	1.5762	2.98183	9.2771e-13	4.3086e-11	sp|Q6R8G7|PHO13_ARATH Phosphate transporter PHO1 homolog 3 OS=Arabidopsis thaliana GN=PHO1;H3 PE=2 SV=2//0
Csa2M270210	18358.9	6158.3	1.5759	2.98121	7.9992e-27	1.3651e-24	-//-
Csa3M175690	3887.37	1309.57	1.5697	2.96843	1.0107e-20	1.1261e-18	sp|O64896|TPPA_ARATH Trehalose-phosphate phosphatase A OS=Arabidopsis thaliana GN=TPPA PE=1 SV=1//1.01302e-177
Csa3M121560	2087.19	704.747	1.5664	2.96165	6.2958e-38	2.3341e-35	sp|P46519|LEA14_SOYBN Desiccation protectant protein Lea14 homolog OS=Glycine max PE=2 SV=1//1.49752e-77
Csa1M422470	1233	416.339	1.5663	2.96144	9.5707e-10	2.6486e-08	sp|Q38910|XTH23_ARATH Probable xyloglucan endotransglucosylase/hydrolase protein 23 OS=Arabidopsis thaliana GN=XTH23 PE=2 SV=1//3.73158e-144
Csa3M119700	15589.6	5285.54	1.5605	2.94956	1.3052e-08	2.9543e-07	sp|Q8H0Y8|WRK41_ARATH Probable WRKY transcription factor 41 OS=Arabidopsis thaliana GN=WRKY41 PE=2 SV=2//1.022e-36
Csa4M665100	204.055	69.1975	1.5602	2.94895	1.2024e-06	1.8042e-05	sp|Q9LSV3|WAKLS_ARATH Putative wall-associated receptor kinase-like 16 OS=Arabidopsis thaliana GN=WAKL16 PE=3 SV=1//2.74057e-63
Csa7M032240	66.8869	22.8189	1.5515	2.93122	0.0074075	0.037382	-//-
Csa5M025910	816.554	279.298	1.5477	2.92351	1.5949e-11	6.0486e-10	sp|Q9S7U5|HSFA8_ARATH Heat stress transcription factor A-8 OS=Arabidopsis thaliana GN=HSFA8 PE=2 SV=1//4.79486e-93
Csa3M556210	585.943	201.038	1.5433	2.9146	8.32e-05	0.0008121	sp|Q9SGA2|GDPD1_ARATH Glycerophosphodiester phosphodiesterase GDPD1, chloroplastic OS=Arabidopsis thaliana GN=GDPD1 PE=1 SV=1//7.5678e-156
Csa7M430220	1142.26	392.073	1.5427	2.91339	1.3718e-07	2.4977e-06	sp|F4IRU3|MYO12_ARATH Myosin-12 OS=Arabidopsis thaliana GN=XI-F PE=2 SV=1//0
Csa3M829130	188.371	64.7106	1.5415	2.91097	0.00011936	0.0011188	sp|Q9LFR1|PTR50_ARATH Protein NRT1/ PTR FAMILY 5.8 OS=Arabidopsis thaliana GN=NPF5.8 PE=2 SV=1//0
Csa6M072990	8210.68	2824.73	1.5394	2.90674	9.4869e-60	1.02e-56	sp|Q8VYW2|BAM9_ARATH Inactive beta-amylase 9 OS=Arabidopsis thaliana GN=BAM9 PE=2 SV=1//0
Csa5M630970	948.967	327.141	1.5364	2.9007	1.2669e-29	2.6973e-27	sp|Q9LJP4|CSLC4_ARATH Xyloglucan glycosyltransferase 4 OS=Arabidopsis thaliana GN=CSLC4 PE=1 SV=1//0
Csa2M237750	2675.73	922.891	1.5357	2.89929	1.047e-46	5.9247e-44	sp|O80462|XLG1_ARATH Extra-large guanine nucleotide-binding protein 1 OS=Arabidopsis thaliana GN=XLG1 PE=1 SV=2//0
Csa4M001850	283.272	97.7256	1.5354	2.89869	0.0028174	0.016927	sp|P46521|LEA5A_GOSHI Late embryogenesis abundant protein Lea5-A OS=Gossypium hirsutum GN=LEA5-A PE=2 SV=1//1.62764e-15
Csa1M042910	126.48	43.6803	1.5339	2.89568	5.031e-07	8.181e-06	sp|Q9ZUT0|AB2G_ARATH ABC transporter G family member 2 OS=Arabidopsis thaliana GN=ABCG2 PE=2 SV=1//2.38376e-58
Csa3M017030	1405.18	486.937	1.5289	2.88566	3.0572e-26	4.9802e-24	sp|Q9LTC0|Y5707_ARATH Probable receptor-like protein kinase At5g47070 OS=Arabidopsis thaliana GN=At5g47070 PE=1 SV=1//3.08418e-146
Csa6M516930	39.0579	13.5432	1.528	2.88386	0.0092795	0.044669	sp|Q41144|STC_RICCO Sugar carrier protein C OS=Ricinus communis GN=STC PE=2 SV=1//0
Csa1M580230	2663.15	924.611	1.5262	2.88026	1.8764e-35	6.1134e-33	sp|Q54I39|IST1L_DICDI IST1-like protein OS=Dictyostelium discoideum GN=DDB_G0289029 PE=3 SV=1//5.08345e-29
Csa1M257330	310.444	107.841	1.5254	2.87867	4.2834e-06	5.7736e-05	-//-
Csa3M431430	2122.17	740.365	1.5192	2.86632	1.0039e-40	4.4972e-38	GH36_ARATH Indole-3-acetic acid-amido synthetase GH3.6
Csa3M516530	248.087	86.62	1.5181	2.86414	9.4383e-12	3.7864e-10	AUX22_SOYBN Auxin-induced protein AUX22
Csa2M258760	46.5438	16.2702	1.5164	2.86076	0.0018064	0.011668	sp|Q9FK62|SAU24_ARATH Auxin-responsive protein SAUR24 OS=Arabidopsis thaliana GN=SAUR24 PE=2 SV=1//4.61963e-29
Csa5M168910	75.2418	26.3045	1.5162	2.86037	7.5285e-05	0.0007443	-//-
Csa1M538280	155.616	54.4211	1.5158	2.85957	3.25e-08	6.7916e-07	sp|Q84MA5|CAAT1_ARATH Cationic amino acid transporter 1 OS=Arabidopsis thaliana GN=CAT1 PE=1 SV=1//0
Csa4M046710	113.636	39.7723	1.5146	2.8572	0.0010579	0.0074783	sp|Q05091|PGIP_PYRCO Polygalacturonase inhibitor OS=Pyrus communis GN=PGIP PE=1 SV=1//1.38225e-151
Csa2M403680	76.4941	26.8546	1.5102	2.8485	6.6004e-05	0.00066415	sp|O81825|DRL28_ARATH Probable disease resistance protein At4g27220 OS=Arabidopsis thaliana GN=At4g27220 PE=2 SV=1//2.21796e-65
Csa6M515450	36.7724	12.9177	1.5093	2.84672	0.0068426	0.034959	-//-
Csa1M524640	611.261	214.795	1.5088	2.84573	5.1047e-22	6.3449e-20	Abscisic acid 8&apos;-hydroxylase 2
Novel00304	55.0629	19.3621	1.5078	2.84376	0.00074108	0.0055428	--
Csa2M351540	217.514	76.5569	1.5065	2.8412	3.1669e-05	0.00034376	-//-
Csa1M303700	583.665	205.833	1.5037	2.83569	4.1965e-10	1.2412e-08	sp|Q38998|AKT1_ARATH Potassium channel AKT1 OS=Arabidopsis thaliana GN=AKT1 PE=1 SV=2//0
Csa4M646260	1584.92	558.953	1.5036	2.83549	1.0205e-30	2.31e-28	sp|Q17QR8|HARB1_BOVIN Putative nuclease HARBI1 OS=Bos taurus GN=HARBI1 PE=2 SV=1//5.86493e-22
Csa6M445760	1066.91	376.514	1.5027	2.83373	2.64e-05	0.00029245	sp|P45730|PALY_POPTR Phenylalanine ammonia-lyase OS=Populus trichocarpa GN=PAL PE=2 SV=1//0
Csa2M138770	64.4167	22.7668	1.5005	2.82941	0.00076074	0.0056701	sp|Q8S920|UBC5A_ORYSJ Ubiquitin-conjugating enzyme E2 5A OS=Oryza sativa subsp. japonica GN=UBC5A PE=2 SV=1//3.12028e-46
Csa2M349080	335.947	118.952	1.4979	2.82431	1.8735e-14	1.0464e-12	-//-
Csa4M648560	169.287	60.1824	1.4921	2.81298	6.2397e-06	8.1169e-05	sp|Q9CAH1|Y1725_ARATH Putative receptor-like protein kinase At1g72540 OS=Arabidopsis thaliana GN=At1g72540 PE=2 SV=1//2.92001e-138
Novel00250	46.7285	16.6118	1.4921	2.81298	0.0023207	0.014356	-//-
Csa1M039030	311.799	110.909	1.4912	2.81123	1.6826e-06	2.4679e-05	-//-
Csa5M148830	128.142	45.6433	1.4893	2.80753	6.7919e-07	1.0763e-05	sp|Q6K4V2|SWET4_ORYSJ Bidirectional sugar transporter SWEET4 OS=Oryza sativa subsp. japonica GN=SWEET4 PE=2 SV=1//5.73139e-92
Csa7M452190	51.0393	18.2099	1.4869	2.80286	0.00147	0.0098163	-//-
Csa1M294080	74.756	26.6982	1.4854	2.79995	0.0001102	0.001043	-//-
Csa5M640510	42.3766	15.1701	1.482	2.79336	0.0036597	0.020957	-//-
Csa7M014470	44.8467	16.0617	1.4814	2.7922	0.0030871	0.018217	sp|Q9ZVX2|AMS_ARATH Transcription factor ABORTED MICROSPORES OS=Arabidopsis thaliana GN=AMS PE=1 SV=2//1.31161e-08
Csa3M405520	192.696	69.0411	1.4808	2.79103	2.4981e-09	6.4564e-08	-//-
Csa3M182080	49.4998	17.7641	1.4785	2.78659	0.0017122	0.011174	sp|P93788|REMO_SOLTU Remorin OS=Solanum tuberosum PE=1 SV=1//3.45709e-43
Csa6M492230	181.125	65.0288	1.4778	2.78524	2.3401e-07	4.0645e-06	sp|Q6WNQ8|C81E8_MEDTR Cytochrome P450 81E8 OS=Medicago truncatula GN=CYP81E8 PE=2 SV=1//0
Csa1M707110	169.486	60.8889	1.4769	2.7835	1.431e-08	3.2087e-07	sp|Q38856|IRT1_ARATH Fe(2+) transport protein 1 OS=Arabidopsis thaliana GN=IRT1 PE=1 SV=2//2.5458e-152
Csa1M020890	214.839	77.24	1.4758	2.78138	3.8882e-10	1.1645e-08	sp|A1YKT1|TCP18_ARATH Transcription factor TCP18 OS=Arabidopsis thaliana GN=TCP18 PE=2 SV=1//1.46603e-15
Csa2M404780	219.013	78.786	1.475	2.77984	0.00015744	0.0014242	sp|Q6R3K4|YSL8_ARATH Probable metal-nicotianamine transporter YSL8 OS=Arabidopsis thaliana GN=YSL8 PE=1 SV=2//0
Novel00515	510.106	183.61	1.4741	2.7781	1.0187e-06	1.5575e-05	-//-
Csa1M009600	610.009	219.759	1.4729	2.77579	1.8357e-09	4.8432e-08	sp|Q84K47|AB2A_ARATH ABC transporter A family member 2 OS=Arabidopsis thaliana GN=ABCA2 PE=2 SV=1//0
Csa4M303170	254.28	91.6461	1.4723	2.77464	1.2629e-11	4.9197e-10	sp|Q9SR36|GSTU8_ARATH Glutathione S-transferase U8 OS=Arabidopsis thaliana GN=GSTU8 PE=2 SV=1//2.89385e-75
Csa1M003500	65.929	23.7627	1.4722	2.77445	0.00026058	0.002235	-//-
Csa1M005770	967.805	350.07	1.4671	2.76466	1.1645e-27	2.1062e-25	-//-
Csa3M141830	748.429	271.104	1.465	2.76063	5.5201e-05	0.00056442	-//-
Csa7M041360	543.375	197.112	1.4629	2.75662	2.4468e-19	2.3488e-17	sp|Q9M2K4|BZP61_ARATH Basic leucine zipper 61 OS=Arabidopsis thaliana GN=BZIP61 PE=1 SV=1//4.67441e-88
Csa4M642500	7039.66	2554.51	1.4625	2.75586	1.8855e-53	1.3981e-50	sp|Q5S1U6|IFRD1_PIG Interferon-related developmental regulator 1 OS=Sus scrofa GN=IFRD1 PE=2 SV=1//1.95823e-33
Csa7M373530	3604.49	1308.22	1.4622	2.75528	1.7995e-13	9.0407e-12	sp|Q9ASS4|Y5838_ARATH Probably inactive leucine-rich repeat receptor-like protein kinase At5g48380 OS=Arabidopsis thaliana GN=At5g48380 PE=1 SV=1//0
Csa5M157930	12360	4501.47	1.4572	2.74575	1.4929e-19	1.4659e-17	sp|Q9LNA5|ACR8_ARATH ACT domain-containing protein ACR8 OS=Arabidopsis thaliana GN=ACR8 PE=2 SV=1//0
Csa7M068600	830.595	303.199	1.4539	2.73948	7.208e-13	3.399e-11	sp|P49295|HEM12_CUCSA Glutamyl-tRNA reductase 2, chloroplastic OS=Cucumis sativus GN=HEMA2 PE=2 SV=1//0
Csa7M378530	2685.03	981.686	1.4516	2.73511	9.2371e-13	4.3021e-11	AX22D_VIGRR Auxin-induced protein 22D
Csa3M133370	60.7491	22.2976	1.446	2.72452	0.00067466	0.0051046	sp|Q03662|GSTX1_TOBAC Probable glutathione S-transferase OS=Nicotiana tabacum PE=2 SV=1//8.1631e-66
Csa4M091870	1825.07	670.085	1.4455	2.72357	6.4933e-07	1.0358e-05	sp|Q06942|FL3H_MALDO Naringenin,2-oxoglutarate 3-dioxygenase OS=Malus domestica PE=2 SV=1//2.42065e-60
Csa2M000800	151.921	55.7819	1.4454	2.72338	1.3738e-07	2.4992e-06	sp|Q5I0E9|S47A1_RAT Multidrug and toxin extrusion protein 1 OS=Rattus norvegicus GN=Slc47a1 PE=1 SV=1//1.35685e-58
Csa2M163170	2512.16	922.411	1.4454	2.72338	3.8999e-07	6.4359e-06	sp|P54144|AMT11_ARATH Ammonium transporter 1 member 1 OS=Arabidopsis thaliana GN=AMT1-1 PE=1 SV=1//0
Csa4M641760	202.987	74.5705	1.4447	2.72206	0.004907	0.026645	sp|Q6WNQ8|C81E8_MEDTR Cytochrome P450 81E8 OS=Medicago truncatula GN=CYP81E8 PE=2 SV=1//6.73382e-137
Csa6M523460	488.018	179.591	1.4422	2.71735	7.3401e-08	1.4219e-06	sp|Q8LBM2|TIF5A_ARATH Protein TIFY 5A OS=Arabidopsis thaliana GN=TIFY5A PE=1 SV=1//6.96459e-22
Csa1M533480	313.332	115.333	1.4419	2.71678	3.6606e-07	6.0831e-06	sp|Q1HDT2|CHX24_ARATH Cation/H(+) antiporter 24 OS=Arabidopsis thaliana GN=CHX24 PE=2 SV=2//0
Csa2M360700	99.198	36.524	1.4415	2.71603	1.506e-05	0.00017803	sp|Q8VYE4|PTR12_ARATH Protein NRT1/ PTR FAMILY 4.5 OS=Arabidopsis thaliana GN=NPF4.5 PE=2 SV=1//6.63904e-118
Csa3M710870	19150.3	7055.17	1.4406	2.71434	1.6235e-06	2.3927e-05	sp|Q9SAH7|WRK40_ARATH Probable WRKY transcription factor 40 OS=Arabidopsis thaliana GN=WRKY40 PE=1 SV=1//4.53637e-61
Csa6M381850	10499.5	3870.16	1.4398	2.71283	7.1958e-08	1.3965e-06	sp|Q39134|AAP3_ARATH Amino acid permease 3 OS=Arabidopsis thaliana GN=AAP3 PE=1 SV=2//0
Csa5M605720	192.648	71.0562	1.4389	2.71114	4.2742e-09	1.0504e-07	sp|Q8W1E3|CDF1_ARATH Cyclic dof factor 1 OS=Arabidopsis thaliana GN=CDF1 PE=1 SV=2//8.37306e-52
Csa3M769610	1399.58	517.347	1.4358	2.70532	6.7816e-10	1.9366e-08	sp|Q9LK64|AB3C_ARATH ABC transporter C family member 3 OS=Arabidopsis thaliana GN=ABCC3 PE=1 SV=1//0
Csa6M012810	1856.41	686.458	1.4353	2.70438	1.7739e-36	6.0548e-34	sp|Q8LFR2|DRE2C_ARATH Dehydration-responsive element-binding protein 2C OS=Arabidopsis thaliana GN=DREB2C PE=2 SV=2//4.90763e-33
Csa3M731880	4120.17	1523.87	1.435	2.70382	3.5426e-47	2.0588e-44	LAX2_MEDTR Auxin transporter-like protein 2
Csa3M902190	2985.72	1106.81	1.4317	2.69764	9.4273e-08	1.7766e-06	-//-
Csa3M405510	17145.3	6360.19	1.4307	2.69577	2.2065e-08	4.7589e-07	CIGR1_ORYSJ Chitin-inducible gibberellin-responsive protein 1
Csa6M014510	2032.19	754.767	1.4289	2.69241	3.9837e-20	4.0791e-18	-//-
Csa6M404220	68.9671	25.6268	1.4283	2.69129	0.00040508	0.0032599	-//-
Csa1M005560	1948.88	725.824	1.425	2.68515	3.6493e-12	1.557e-10	sp|O80738|TPS10_ARATH Probable alpha,alpha-trehalose-phosphate synthase [UDP-forming] 10 OS=Arabidopsis thaliana GN=TPS10 PE=2 SV=1//0
Csa7M073500	231.761	86.4114	1.4233	2.68198	1.9893e-05	0.00022717	sp|Q9AT54|SCGT_TOBAC Scopoletin glucosyltransferase OS=Nicotiana tabacum GN=TOGT1 PE=1 SV=1//3.71341e-179
Csa5M517150	274.315	102.288	1.4232	2.6818	1.5321e-11	5.862e-10	sp|Q06548|APK1A_ARATH Protein kinase APK1A, chloroplastic OS=Arabidopsis thaliana GN=APK1A PE=2 SV=1//6.32522e-144
Csa3M168930	879.329	327.911	1.4231	2.68161	8.4993e-25	1.2692e-22	sp|B9DFA8|INVC_ARATH Alkaline/neutral invertase C, mitochondrial OS=Arabidopsis thaliana GN=INVC PE=1 SV=1//0
Csa3M119240	314.639	117.753	1.4179	2.67196	2.1185e-12	9.412e-11	sp|P46897|ATHB7_ARATH Homeobox-leucine zipper protein ATHB-7 OS=Arabidopsis thaliana GN=ATHB-7 PE=2 SV=2//3.79348e-55
Csa5M605000	1999.96	749.258	1.4164	2.66919	1.0795e-36	3.7439e-34	sp|Q9C518|TCP8_ARATH Transcription factor TCP8 OS=Arabidopsis thaliana GN=TCP8 PE=1 SV=1//1.23952e-43
Csa4M658610	722.762	271.012	1.4152	2.66697	3.7109e-06	5.0728e-05	sp|Q7X9B9|NLP2_ARATH Protein NLP2 OS=Arabidopsis thaliana GN=NLP2 PE=2 SV=3//0
Csa6M495100	471.212	176.788	1.4144	2.66549	0.00062723	0.0047912	sp|Q9FJX5|BT4_ARATH BTB/POZ and TAZ domain-containing protein 4 OS=Arabidopsis thaliana GN=BT4 PE=1 SV=1//2.97389e-160
Csa1M537320	4583.39	1724.56	1.4102	2.65774	1.6609e-06	2.4445e-05	sp|Q3EBR6|PLA16_ARATH Phospholipase A1-Igamma2, chloroplastic OS=Arabidopsis thaliana GN=At2g30550 PE=1 SV=2//2.24801e-128
Csa1M690150	827.305	311.369	1.4098	2.657	7.0935e-24	9.7153e-22	sp|Q9SPK4|PPCK1_ARATH Phosphoenolpyruvate carboxylase kinase 1 OS=Arabidopsis thaliana GN=PPCK1 PE=1 SV=1//9.97528e-115
Csa7M071520	3373.6	1269.95	1.4095	2.65645	2.0992e-28	4.1036e-26	sp|O81760|P2C63_ARATH Probable protein phosphatase 2C 63 OS=Arabidopsis thaliana GN=At4g33920 PE=2 SV=1//0
Csa1M597690	8091.98	3050	1.4077	2.65314	8.5159e-06	0.00010727	sp|Q9LMA8|TI10A_ARATH Protein TIFY 10A OS=Arabidopsis thaliana, jasmonates ZIM-domain protein
Csa3M133380	550.17	207.964	1.4035	2.64543	8.2908e-06	0.00010478	sp|P32110|GSTX6_SOYBN Probable glutathione S-transferase OS=Glycine max GN=HSP26-A PE=2 SV=1//3.92998e-60
Csa4M296260	1238.73	469.89	1.3985	2.63627	4.5245e-28	8.6097e-26	-//-
Csa5M220390	186.462	70.8189	1.3967	2.63299	1.5355e-08	3.4179e-07	-//-
Csa6M134890	9663.69	3681.24	1.3924	2.62515	3.1626e-51	2.0607e-48	sp|Q7VG78|GUAA_HELHP Probable GMP synthase [glutamine-hydrolyzing] OS=Helicobacter hepaticus (strain ATCC 51449 / 3B1) GN=guaA PE=3 SV=1//1.24106e-39
Csa7M351890	214.25	81.6406	1.3919	2.62424	2.2638e-09	5.8932e-08	sp|Q8H0M1|QORH_SPIOL Quinone-oxidoreductase homolog, chloroplastic OS=Spinacia oleracea GN=QOR PE=1 SV=1//2.05912e-122
Csa4M638520	157.785	60.2867	1.388	2.61716	1.7465e-07	3.0987e-06	sp|O22227|MIZ1_ARATH Protein MIZU-KUSSEI 1 OS=Arabidopsis thaliana GN=MIZ1 PE=1 SV=1//3.79614e-41
Csa5M635950	589.303	225.247	1.3875	2.61625	5.7072e-19	5.2897e-17	sp|Q8GW32|PRE6_ARATH Transcription factor PRE6 OS=Arabidopsis thaliana GN=PRE6 PE=1 SV=1//2.01287e-30
Csa1M617380	1699.12	650.714	1.3847	2.61118	1.0063e-05	0.00012421	sp|Q9LM18|FB303_ARATH F-box protein At1g22220 OS=Arabidopsis thaliana GN=At1g22220 PE=2 SV=1//1.32369e-36
Csa3M135050	79.7169	30.5775	1.3824	2.60702	0.0024135	0.014845	sp|Q7XBH4|MYB4_ORYSJ Myb-related protein Myb4 OS=Oryza sativa subsp. japonica GN=MYB4 PE=2 SV=2//7.0695e-48
Csa6M449290	1339.09	513.901	1.3817	2.60575	1.505e-15	9.8066e-14	-//-
Csa5M157310	74.9407	28.8464	1.3774	2.598	0.0012555	0.0086147	sp|O64635|C76C4_ARATH Cytochrome P450 76C4 OS=Arabidopsis thaliana GN=CYP76C4 PE=3 SV=1//3.02093e-61
Csa3M014360	40.5153	15.6159	1.3755	2.59458	0.007838	0.039093	sp|B5BSX1|BAMO_GLYUR Beta-amyrin 11-oxidase OS=Glycyrrhiza uralensis GN=CYP88D6 PE=1 SV=1//1.01276e-62
Csa6M358680	446.38	172.059	1.3754	2.5944	2.4395e-05	0.00027222	sp|Q8LBB7|LOG5_ARATH Cytokinin riboside 5&apos;-monophosphate phosphoribohydrolase LOG5 OS=Arabidopsis thaliana GN=LOG5 PE=1 SV=1//4.54479e-65
Csa6M095930	181.501	70.0028	1.3745	2.59278	2.3846e-08	5.1124e-07	sp|Q8S8N4|Y2685_ARATH Probably inactive receptor-like protein kinase At2g46850 OS=Arabidopsis thaliana GN=At2g46850 PE=3 SV=1//4.65785e-179
Csa3M143570	4377.3	1688.39	1.3744	2.5926	4.0642e-31	9.6035e-29	IAA14_ARATH Auxin-responsive protein IAA14
Csa1M009610	495.894	192.811	1.3628	2.57184	1.7427e-16	1.2367e-14	sp|Q9STT5|AB7A_ARATH ABC transporter A family member 7 OS=Arabidopsis thaliana GN=ABCA7 PE=3 SV=2//0
Csa7M432520	4461.7	1735.23	1.3625	2.5713	0.00029478	0.0024877	sp|P29602|CPC_CUCSA Cucumber peeling cupredoxin OS=Cucumis sativus PE=1 SV=3//2.67675e-18
Csa3M144210	265.208	103.174	1.362	2.57041	9.9172e-11	3.3582e-09	sp|Q9LIK5|CML11_ARATH Calmodulin-like protein 11 OS=Arabidopsis thaliana GN=CML11 PE=2 SV=1//3.64677e-84
Csa6M190450	2678.05	1042.53	1.3611	2.56881	2.3335e-12	1.0282e-10	sp|Q9LQN6|P2C04_ARATH Probable protein phosphatase 2C 4 OS=Arabidopsis thaliana GN=PLL5 PE=2 SV=1//0
Csa1M002860	2983.96	1161.99	1.3606	2.56792	3.9119e-10	1.1699e-08	sp|Q9SKB2|SBIR1_ARATH Leucine-rich repeat receptor-like serine/threonine/tyrosine-protein kinase SOBIR1 OS=Arabidopsis thaliana GN=SOBIR1 PE=1 SV=1//0
Csa7M447020	9139.71	3561.71	1.3596	2.56614	7.0781e-49	4.2278e-46	sp|Q9M817|PTR6_ARATH Protein NRT1/ PTR FAMILY 1.2 OS=Arabidopsis thaliana GN=NPF1.2 PE=1 SV=1//0
Csa6M495680	4724.46	1842.29	1.3586	2.56436	8.0159e-12	3.2522e-10	sp|O81108|ACA2_ARATH Calcium-transporting ATPase 2, plasma membrane-type OS=Arabidopsis thaliana GN=ACA2 PE=1 SV=1//0
Csa6M108510	546.447	213.116	1.3584	2.56401	1.2959e-09	3.5094e-08	sp|Q9S818|FL3H_ARATH Naringenin,2-oxoglutarate 3-dioxygenase OS=Arabidopsis thaliana GN=F3H PE=1 SV=1//7.08194e-150
Csa1M077190	80.4628	31.3882	1.3581	2.56347	0.00019388	0.0017156	-//-
Csa6M052820	205.834	80.5117	1.3542	2.55655	1.9936e-07	3.4965e-06	sp|C0LGF5|Y1341_ARATH Probable LRR receptor-like serine/threonine-protein kinase At1g34110 OS=Arabidopsis thaliana GN=At1g34110 PE=2 SV=2//0
Csa5M495950	139.624	54.6242	1.3539	2.55602	0.0052654	0.028335	sp|O49169|EF1A_MANES Elongation factor 1-alpha OS=Manihot esculenta GN=EF1 PE=3 SV=1//4.28963e-14
Csa1M064820	574.017	224.778	1.3526	2.55372	8.1774e-18	6.8154e-16	sp|Q9M0X5|CRK25_ARATH Cysteine-rich receptor-like protein kinase 25 OS=Arabidopsis thaliana GN=CRK25 PE=3 SV=1//2.39246e-63
Csa5M202350	344.233	135.535	1.3447	2.53977	1.4425e-12	6.5998e-11	-//-
Csa5M608080	617.816	243.358	1.3441	2.53872	0.00030677	0.0025715	-//-
Csa1M561370	246.582	97.1756	1.3434	2.53749	5.5373e-10	1.6069e-08	sp|Q8LPH6|MYB86_ARATH Transcription factor MYB86 OS=Arabidopsis thaliana GN=MYB86 PE=2 SV=1//3.61758e-56
Csa1M574880	3612.43	1424.94	1.3421	2.5352	1.115e-15	7.3543e-14	sp|Q0J2L7|P2C68_ORYSJ Probable protein phosphatase 2C 68, ABI1 (ABA INSENSITIVE 1)
Csa4M651800	126.89	50.1715	1.3386	2.52906	0.00062204	0.0047567	sp|Q9M8L3|VQ11_ARATH VQ motif-containing protein 11 OS=Arabidopsis thaliana GN=VQ11 PE=1 SV=1//7.99185e-11
Csa5M429990	1321.45	522.76	1.3379	2.52783	9.8929e-14	5.1259e-12	sp|Q9M8T0|Y3288_ARATH Probable inactive receptor kinase At3g02880 OS=Arabidopsis thaliana GN=At3g02880 PE=1 SV=1//3.66229e-144
Csa4M008770	467.716	185.92	1.3309	2.5156	3.1313e-15	1.9238e-13	sp|P45730|PALY_POPTR Phenylalanine ammonia-lyase OS=Populus trichocarpa GN=PAL PE=2 SV=1//0
Csa5M645150	406.775	161.706	1.3309	2.5156	4.1536e-05	0.00043589	sp|Q9SG92|MES17_ARATH Methylesterase 17 OS=Arabidopsis thaliana GN=MES17 PE=1 SV=1//1.32761e-52
Csa1M049960	4739.38	1884.53	1.3305	2.5149	2.7725e-10	8.5904e-09	sp|Q93Z25|PLY22_ARATH Probable pectate lyase 22 OS=Arabidopsis thaliana GN=At5g63180 PE=2 SV=1//0
Csa4M129550	377.468	150.103	1.3304	2.51472	3.019e-13	1.4924e-11	-//-
Csa1M532310	234.86	93.406	1.3302	2.51438	0.0015655	0.010371	sp|Q54R82|MKKA_DICDI Mitogen-activated protein kinase kinase kinase A OS=Dictyostelium discoideum GN=mkkA PE=1 SV=2//1.46639e-43
Csa1M164660	973.826	387.85	1.3282	2.51089	1.3351e-23	1.817e-21	sp|Q9ZQG9|E1314_ARATH Glucan endo-1,3-beta-glucosidase 14 OS=Arabidopsis thaliana GN=At2g27500 PE=1 SV=2//0
Csa1M024860	264.195	105.224	1.3281	2.51072	3.8287e-10	1.1482e-08	sp|P32110|GSTX6_SOYBN Probable glutathione S-transferase OS=Glycine max GN=HSP26-A PE=2 SV=1//6.75768e-68
Csa7M039240	202.851	80.8532	1.327	2.5088	1.668e-08	3.6786e-07	sp|Q9ZWA6|IDD3_ARATH Zinc finger protein MAGPIE OS=Arabidopsis thaliana GN=MGP PE=1 SV=1//4.99096e-94
Csa2M338830	2337.09	932.224	1.326	2.50707	1.7146e-07	3.0521e-06	sp|Q39013|NAC2_ARATH NAC domain-containing protein 2 OS=Arabidopsis thaliana GN=NAC002 PE=2 SV=2//4.20336e-110
Csa3M730710	3780.22	1508.8	1.3251	2.5055	4.6782e-08	9.4991e-07	sp|Q9LZX1|LOR15_ARATH Protein LURP-one-related 15 OS=Arabidopsis thaliana GN=At5g01750 PE=1 SV=1//6.79571e-74
Csa6M519600	491.693	196.32	1.3246	2.50463	1.0281e-15	6.8024e-14	-//-
Csa3M717370	311.908	124.551	1.3244	2.50429	0.0082801	0.040808	sp|Q9SAH9|CCR2_ARATH Cinnamoyl-CoA reductase 2 OS=Arabidopsis thaliana GN=CCR2 PE=1 SV=1//1.47123e-158
Csa5M172890	1420.32	568.919	1.3199	2.49649	0.00025648	0.0022034	sp|Q9C5L3|GLPT1_ARATH Putative glycerol-3-phosphate transporter 1 OS=Arabidopsis thaliana GN=At3g47420 PE=2 SV=1//0
Csa6M525670	12709.2	5092.25	1.3195	2.4958	4.0695e-16	2.7692e-14	sp|Q9SVG4|RETOL_ARATH Reticuline oxidase-like protein OS=Arabidopsis thaliana GN=At4g20830 PE=1 SV=2//0
Csa7M452290	453.928	181.937	1.319	2.49493	8.7491e-15	5.0771e-13	sp|Q9LU14|APG2_ARATH GDSL esterase/lipase APG OS=Arabidopsis thaliana GN=APG PE=1 SV=1//1.91779e-134
Csa1M580250	348.886	140.045	1.3169	2.4913	3.4068e-12	1.4651e-10	-//-
Csa4M094530	61.8029	24.9437	1.309	2.4777	0.0015677	0.010382	sp|Q9FFX0|RBL9_ARATH RHOMBOID-like protein 9, chloroplastic OS=Arabidopsis thaliana GN=RBL9 PE=2 SV=1//1.21542e-88
Csa5M593430	84.2673	34.0576	1.307	2.47426	0.0001716	0.00154	sp|Q9LY87|RGLG2_ARATH E3 ubiquitin-protein ligase RGLG2
Csa1M045990	242.216	97.9917	1.3056	2.47187	2.5938e-09	6.6635e-08	sp|Q9XIJ5|PUB18_ARATH U-box domain-containing protein 18 OS=Arabidopsis thaliana GN=PUB18 PE=2 SV=1//1.04118e-150
Csa2M409500	4163.88	1686.21	1.3041	2.4693	1.5943e-08	3.5343e-07	sp|Q9SGP6|GRXC9_ARATH Glutaredoxin-C9 OS=Arabidopsis thaliana GN=GRXC9 PE=1 SV=1//8.07034e-38
Csa2M011420	915.007	371.684	1.2997	2.46178	3.8776e-22	4.876e-20	AX22D_VIGRR Auxin-induced protein 22D
Csa3M733310	144.537	58.7407	1.299	2.46058	0.00022505	0.0019571	sp|P0CI03|PTR28_ARATH Protein NRT1/ PTR FAMILY 5.6 OS=Arabidopsis thaliana GN=NPF5.6 PE=2 SV=1//3.11468e-49
Csa1M470240	700.681	284.913	1.2982	2.45922	5.6098e-06	7.3733e-05	-//-
Csa1M181330	865.007	352.015	1.2971	2.45734	3.8198e-21	4.416e-19	sp|O22893|GOLS1_ARATH Galactinol synthase 1 OS=Arabidopsis thaliana GN=GOLS1 PE=1 SV=1//7.5706e-178
Csa6M087910	274.609	111.853	1.2958	2.45513	4.446e-10	1.3096e-08	-//-
Csa6M485150	200.476	81.8725	1.292	2.44867	0.0034855	0.020137	sp|Q9FGG3|WTR45_ARATH WAT1-related protein At5g64700 OS=Arabidopsis thaliana GN=At5g64700 PE=2 SV=1//1.50325e-77
Csa1M024230	211.397	86.6433	1.2868	2.43986	2.2835e-08	4.915e-07	sp|P0C5E2|Y1839_ARATH Probable serine/threonine-protein kinase At1g18390 OS=Arabidopsis thaliana GN=At1g18390 PE=2 SV=2//2.33964e-173
Novel00036	1512.16	621.233	1.2834	2.43412	6.6107e-28	1.2469e-25	--
Csa5M643330	3084.94	1268.4	1.2822	2.4321	5.9294e-06	7.7555e-05	sp|O67409|TRPB2_AQUAE Tryptophan synthase beta chain 2 OS=Aquifex aeolicus (strain VF5) GN=trpB2 PE=3 SV=1//2.52606e-147
Csa5M174590	2195	902.796	1.2818	2.43142	2.2529e-32	5.9809e-30	sp|P80065|INVB_DAUCA Beta-fructofuranosidase, soluble isoenzyme I OS=Daucus carota GN=INV*DC4 PE=1 SV=2//0
Csa2M070840	1177.35	485.224	1.2788	2.42637	0.0011525	0.0080359	sp|Q5XQC7|BON3_ARATH Protein BONZAI 3 OS=Arabidopsis thaliana GN=BON3 PE=1 SV=1//0
Csa2M033340	124.762	51.4568	1.2777	2.42452	1.1779e-05	0.00014334	-//-
Csa6M445770	437.526	180.495	1.2774	2.42402	0.0067889	0.03475	sp|P45730|PALY_POPTR Phenylalanine ammonia-lyase OS=Populus trichocarpa GN=PAL PE=2 SV=1//0
Csa6M001760	261.608	107.968	1.2768	2.42301	2.9217e-06	4.0795e-05	sp|Q50EK6|C72B1_PINTA Abietadienol/abietadienal oxidase OS=Pinus taeda GN=CYP720B1 PE=1 SV=1//3.56961e-126
Novel00372	1173.36	484.452	1.2762	2.422	2.2774e-24	3.2867e-22	--
Csa5M033470	1082.65	447.853	1.2735	2.41747	3.2146e-10	9.8326e-09	sp|O23081|CRK41_ARATH Cysteine-rich receptor-like protein kinase 41 OS=Arabidopsis thaliana GN=CRK41 PE=3 SV=2//4.06575e-78
Csa2M369220	2261.98	936.023	1.273	2.41664	1.072e-10	3.5962e-09	sp|Q8L936|CAP16_ARATH Putative clathrin assembly protein At4g40080 OS=Arabidopsis thaliana GN=At4g40080 PE=2 SV=2//8.56482e-46
Csa3M782680	4578.02	1894.47	1.2729	2.41647	2.3003e-10	7.2315e-09	sp|Q9ZSD4|SY121_ARATH Syntaxin-121 OS=Arabidopsis thaliana GN=SYP121 PE=1 SV=1//4.79145e-145
Csa1M025940	784.893	325.358	1.2705	2.41245	1.4202e-19	1.4008e-17	sp|Q9C757|INT2_ARATH Probable inositol transporter 2 OS=Arabidopsis thaliana GN=INT2 PE=1 SV=1//0
Csa5M352630	517.127	214.378	1.2704	2.41228	4.5544e-15	2.751e-13	sp|Q2TBP5|TMM53_BOVIN Transmembrane protein 53 OS=Bos taurus GN=TMEM53 PE=2 SV=1//1.95436e-19
Csa2M406780	364.447	151.805	1.2635	2.40077	6.0216e-12	2.4853e-10	sp|Q9SRE6|CML38_ARATH Calcium-binding protein CML38 OS=Arabidopsis thaliana GN=CML38 PE=2 SV=1//1.79758e-28
Csa4M645830	1778.62	741.136	1.2629	2.39978	1.7933e-19	1.7448e-17	sp|O04135|KNAP2_MALDO Homeobox protein knotted-1-like 2 OS=Malus domestica PE=2 SV=1//3.08511e-150
Csa2M352960	859.999	358.628	1.2618	2.39795	1.58e-20	1.7159e-18	sp|F4IBD7|CSCLA_ARATH CSC1-like protein RXW8 OS=Arabidopsis thaliana GN=RXW8 PE=2 SV=1//0
Csa3M850640	2963.66	1236.14	1.2615	2.39745	3.0917e-34	9.3635e-32	sp|Q9LJB7|BBX32_ARATH B-box zinc finger protein 32 OS=Arabidopsis thaliana GN=BBX32 PE=1 SV=1//3.5029e-08
Csa4M279910	286.536	119.606	1.2604	2.39562	5.1358e-10	1.4984e-08	-//-
Csa6M490950	866.54	362.964	1.2554	2.38733	1.5717e-08	3.4949e-07	sp|Q40541|NPK1_TOBAC Mitogen-activated protein kinase kinase kinase NPK1 OS=Nicotiana tabacum GN=NPK1 PE=1 SV=1//2.48516e-44
Csa2M421020	1000.18	419.443	1.2537	2.38452	6.3665e-05	0.00064272	sp|Q9SUT2|PER39_ARATH Peroxidase 39 OS=Arabidopsis thaliana GN=PER39 PE=1 SV=1//3.11393e-146
Csa3M133950	11594.6	4866.19	1.2526	2.3827	1.0285e-22	1.3243e-20	sp|Q9LIR6|BAM1_ARATH Beta-amylase 1, chloroplastic OS=Arabidopsis thaliana GN=BAM1 PE=1 SV=1//0
Csa2M372760	288.192	121.014	1.2519	2.38155	3.4345e-10	1.0419e-08	sp|Q9SIA4|MATE5_ARATH MATE efflux family protein 5 OS=Arabidopsis thaliana GN=DTXL1 PE=3 SV=1//3.22513e-56
Csa5M610510	44.5799	18.7599	1.2487	2.37627	0.0094295	0.045212	-//-
Csa3M852470	429.5	181.311	1.2442	2.36887	9.5457e-06	0.00011844	sp|Q93VY3|NAC72_ARATH NAC domain-containing protein 72 OS=Arabidopsis thaliana GN=NAC072 PE=2 SV=1//2.87628e-120
Csa5M517130	5027.68	2122.39	1.2442	2.36887	6.0323e-07	9.6512e-06	-//-
Csa3M150000	876.681	370.753	1.2416	2.36461	5.3573e-07	8.668e-06	sp|P13917|7SB1_SOYBN Basic 7S globulin OS=Glycine max GN=BG PE=1 SV=2//5.84824e-72
Csa2M404760	1551.89	656.438	1.2413	2.36411	4.8987e-23	6.4229e-21	sp|Q9SHY2|YSL7_ARATH Probable metal-nicotianamine transporter YSL7 OS=Arabidopsis thaliana GN=YSL7 PE=2 SV=1//0
Csa3M901130	2498.78	1057.67	1.2403	2.36248	2.2413e-14	1.2389e-12	sp|Q8L586|Y4958_ARATH Uncharacterized membrane protein At4g09580 OS=Arabidopsis thaliana GN=At4g09580 PE=1 SV=1//3.24675e-109
Csa6M526480	1297.48	549.429	1.2397	2.36149	2.0446e-24	2.9706e-22	-//-
Csa2M369140	255.361	108.287	1.2377	2.35822	4.5557e-09	1.1132e-07	-//-
Csa5M146200	491.645	208.497	1.2376	2.35806	5.7637e-07	9.2698e-06	sp|Q9SV84|NIP51_ARATH Probable aquaporin NIP5-1 OS=Arabidopsis thaliana GN=NIP5-1 PE=2 SV=1//4.00604e-83
Csa5M305760	787.309	334.396	1.2354	2.35447	1.4244e-10	4.6618e-09	sp|Q4V3D9|SSL10_ARATH Protein STRICTOSIDINE SYNTHASE-LIKE 10 OS=Arabidopsis thaliana GN=SSL10 PE=2 SV=1//2.11172e-102
Csa1M002940	3369.28	1431.16	1.2353	2.3543	2.1039e-12	9.3664e-11	-//-
Csa3M354500	503.572	213.927	1.2351	2.35398	2.5876e-14	1.423e-12	sp|Q9ZNX9|SIGE_ARATH RNA polymerase sigma factor sigE, chloroplastic/mitochondrial OS=Arabidopsis thaliana GN=SIGE PE=1 SV=1//0
Csa3M731840	1114.87	473.602	1.2351	2.35398	7.2431e-12	2.961e-10	sp|C0LGP4|Y3475_ARATH Probable LRR receptor-like serine/threonine-protein kinase At3g47570 OS=Arabidopsis thaliana GN=At3g47570 PE=2 SV=1//0
Csa3M665100	57.1498	24.2894	1.2344	2.35283	0.0040678	0.02285	-//-
Csa5M615290	556.321	236.584	1.2336	2.35153	1.6101e-08	3.5619e-07	sp|Q9LZS0|PTL_ARATH Trihelix transcription factor PTL OS=Arabidopsis thaliana GN=PTL PE=2 SV=1//7.28332e-61
Csa5M598080	3600.38	1533.95	1.2309	2.34713	3.4814e-34	1.0397e-31	sp|Q02527|MGAT3_RAT Beta-1,4-mannosyl-glycoprotein 4-beta-N-acetylglucosaminyltransferase OS=Rattus norvegicus GN=Mgat3 PE=1 SV=2//3.32652e-16
Csa7M352410	1394.36	595.263	1.228	2.34242	1.1504e-24	1.6827e-22	-//-
Csa5M182630	3424.65	1462.75	1.2273	2.34128	1.101e-33	3.1992e-31	sp|Q9C7B1|TRP3_ARATH Telomere repeat-binding protein 3 OS=Arabidopsis thaliana GN=TRP3 PE=1 SV=1//2.46737e-124
Csa2M004710	1132.54	484.179	1.226	2.33918	2.6607e-06	3.7492e-05	sp|Q9FK16|AGP22_ARATH Arabinogalactan peptide 22 OS=Arabidopsis thaliana GN=AGP22 PE=3 SV=1//2.50813e-07
Novel00380	148.944	63.7201	1.2249	2.33739	4.9346e-06	6.5866e-05	--
Csa4M269120	697.307	298.394	1.2246	2.33691	2.5291e-17	1.9217e-15	sp|Q7G192|ALDO2_ARATH Indole-3-acetaldehyde oxidase OS=Arabidopsis thaliana GN=AAO2 PE=1 SV=2//0
Csa4M652770	2962.77	1267.82	1.2246	2.33691	3.2692e-19	3.0832e-17	sp|Q99614|TTC1_HUMAN Tetratricopeptide repeat protein 1 OS=Homo sapiens GN=TTC1 PE=1 SV=1//3.16268e-13
Csa1M033120	441.207	188.921	1.2237	2.33545	7.7381e-07	1.2128e-05	sp|Q9FUT0|GSTU9_ARATH Glutathione S-transferase U9 OS=Arabidopsis thaliana GN=GSTU9 PE=2 SV=1//1.6526e-62
Csa3M852560	538.866	230.875	1.2228	2.33399	8.3497e-15	4.8657e-13	sp|O49858|C82A3_SOYBN Cytochrome P450 82A3 OS=Glycine max GN=CYP82A3 PE=2 SV=1//3.27996e-164
Csa3M181960	176.123	75.4855	1.2223	2.33318	9.7391e-07	1.4937e-05	-//-
Csa5M374720	1015.9	436.116	1.22	2.32947	5.7136e-21	6.52e-19	sp|P27484|GRP2_NICSY Glycine-rich protein 2 OS=Nicotiana sylvestris GN=GRP-2 PE=2 SV=1//2.14178e-22
Csa4M608130	2034.88	873.68	1.2198	2.32914	2.8464e-15	1.769e-13	sp|Q9LS40|ASPG1_ARATH Protein ASPARTIC PROTEASE IN GUARD CELL 1 OS=Arabidopsis thaliana GN=ASPG1 PE=1 SV=1//1.6495e-62
Csa1M533490	545.832	234.76	1.2173	2.32511	1.2403e-14	7.0743e-13	sp|Q944L7|Y1480_ARATH Uncharacterized protein At1g18480 OS=Arabidopsis thaliana GN=At1g18480 PE=2 SV=1//1.2682e-56
Csa1M397130	233.403	100.406	1.217	2.32463	0.0058464	0.030798	IAA16_ARATH Auxin-responsive protein IAA16
Csa4M152270	1689.98	727.528	1.2159	2.32286	1.2467e-26	2.1108e-24	-//-
Csa5M639500	1601.25	689.805	1.2149	2.32125	5.8751e-26	9.3579e-24	sp|Q9S823|LNG2_ARATH Protein LONGIFOLIA 2 OS=Arabidopsis thaliana GN=LNG2 PE=1 SV=1//1.35804e-76
Csa1M015870	159.755	68.908	1.2131	2.31835	0.00011394	0.0010741	-//-
Csa3M116640	841.428	363.543	1.2107	2.3145	1.2202e-18	1.1118e-16	sp|Q700E4|BH067_ARATH Transcription factor bHLH67 OS=Arabidopsis thaliana GN=BHLH67 PE=2 SV=1//6.56564e-71
Csa1M014320	1627.63	703.319	1.2105	2.31418	5.2297e-26	8.392e-24	sp|Q9S823|LNG2_ARATH Protein LONGIFOLIA 2 OS=Arabidopsis thaliana GN=LNG2 PE=1 SV=1//1.19509e-53
Csa6M398200	538.619	233.156	1.208	2.31017	5.7636e-06	7.557e-05	-//-
Csa3M646010	404.189	175.018	1.2075	2.30937	5.1462e-12	2.1529e-10	-//-
Csa1M427510	206.552	89.4979	1.2066	2.30793	1.3213e-07	2.4243e-06	sp|O64566|PIRL6_ARATH Plant intracellular Ras-group-related LRR protein 6 OS=Arabidopsis thaliana GN=PIRL6 PE=2 SV=1//6.17664e-154
Csa2M033350	949.993	411.99	1.2053	2.30585	4.0261e-09	9.9815e-08	sp|Q9C9T2|SARD1_ARATH Protein SAR DEFICIENT 1 OS=Arabidopsis thaliana GN=SARD1 PE=1 SV=1//1.11445e-35
Csa2M436040	155.671	67.5185	1.2051	2.30553	0.006345	0.032932	sp|Q42602|C89A2_ARATH Cytochrome P450 89A2 OS=Arabidopsis thaliana GN=CYP89A2 PE=2 SV=2//0
Csa4M645310	45.9348	19.9643	1.2022	2.3009	0.0098287	0.046675	-//-
Csa2M416190	1144.85	498.024	1.2009	2.29883	7.9164e-22	9.672e-20	sp|Q339N5|CSLH1_ORYSJ Cellulose synthase-like protein H1 OS=Oryza sativa subsp. japonica GN=CSLH1 PE=2 SV=2//0
Csa3M119640	607.724	264.62	1.1995	2.2966	1.554e-15	1.0096e-13	sp|O65717|CNGC1_ARATH Cyclic nucleotide-gated ion channel 1 OS=Arabidopsis thaliana GN=CNGC1 PE=1 SV=1//0
Csa6M127480	540.994	235.756	1.1983	2.29469	3.369e-14	1.8294e-12	sp|Q9ZVM9|Y1461_ARATH Probable serine/threonine-protein kinase At1g54610 OS=Arabidopsis thaliana GN=At1g54610 PE=1 SV=1//9.60488e-170
Csa1M595810	1078.33	471.263	1.1942	2.28818	2.7581e-14	1.5053e-12	sp|Q9SKI2|VPS2A_ARATH Vacuolar protein sorting-associated protein 2 homolog 1 OS=Arabidopsis thaliana GN=VPS2.1 PE=1 SV=2//1.49071e-108
Csa5M591770	146.077	63.8478	1.194	2.28786	0.0067718	0.034678	sp|Q8GYN5|RIN4_ARATH RPM1-interacting protein 4 OS=Arabidopsis thaliana GN=RIN4 PE=1 SV=1//5.13861e-08
Novel00323	160.7	70.2455	1.1939	2.2877	3.9953e-06	5.4203e-05	--
Csa4M166950	1342.22	587.476	1.192	2.28469	3.0463e-20	3.1492e-18	sp|Q8VZ42|SAP11_ARATH Zinc finger AN1 and C2H2 domain-containing stress-associated protein 11 OS=Arabidopsis thaliana GN=SAP11 PE=2 SV=1//6.03995e-111
Csa5M166440	989.55	433.524	1.1907	2.28263	5.5194e-05	0.00056442	sp|P32294|AX22B_VIGRR Auxin-induced protein 22B
Csa6M509690	1414.12	621.024	1.1872	2.2771	1.105e-18	1.0154e-16	sp|O22757|MLO8_ARATH MLO-like protein 8 OS=Arabidopsis thaliana GN=MLO8 PE=1 SV=2//0
Csa3M838720	244.201	107.395	1.1851	2.27379	3.0817e-08	6.4762e-07	sp|Q9FND9|RFS5_ARATH Probable galactinol--sucrose galactosyltransferase 5 OS=Arabidopsis thaliana GN=RFS5 PE=1 SV=1//0
Csa6M505910	5889.62	2595.49	1.1822	2.26923	1.0036e-16	7.266e-15	sp|Q9FKW4|CDPKS_ARATH Calcium-dependent protein kinase 28 OS=Arabidopsis thaliana GN=CPK28 PE=1 SV=1//0
Csa5M175910	2335.01	1029.26	1.1818	2.2686	1.6661e-28	3.3173e-26	sp|Q9M1S3|ARP1_ARATH Probable RNA-binding protein ARP1 OS=Arabidopsis thaliana GN=ARP1 PE=2 SV=1//4.26536e-54
Csa1M597780	68.9261	30.3923	1.1813	2.26781	0.0019864	0.012567	sp|Q9LY17|PME50_ARATH Probable pectinesterase 50 OS=Arabidopsis thaliana GN=PME50 PE=2 SV=1//2.17256e-105
Csa2M336130	5931.62	2615.59	1.1813	2.26781	4.1088e-11	1.4604e-09	sp|P57108|GSTZ_EUPES Glutathione S-transferase zeta class OS=Euphorbia esula PE=2 SV=1//5.90349e-93
Csa5M374730	792.907	349.78	1.1807	2.26687	1.3787e-07	2.5039e-06	sp|Q9FEL6|LAX3_MEDTR Auxin transporter-like protein 3
Csa3M733300	308.638	136.16	1.1806	2.26671	4.8958e-08	9.8943e-07	sp|P0CI03|PTR28_ARATH Protein NRT1/ PTR FAMILY 5.6 OS=Arabidopsis thaliana GN=NPF5.6 PE=2 SV=1//1.24293e-51
Csa6M356490	3985.38	1759.36	1.1797	2.2653	2.0055e-09	5.259e-08	sp|P43293|NAK_ARATH Probable serine/threonine-protein kinase NAK OS=Arabidopsis thaliana GN=NAK PE=1 SV=2//6.32044e-129
Csa7M075570	1393.65	615.348	1.1794	2.26483	8.7824e-08	1.6683e-06	sp|P90648|MHCKB_DICDI Myosin heavy chain kinase B OS=Dictyostelium discoideum GN=mhkB PE=2 SV=1//3.82256e-10
Csa6M520420	1021.86	451.322	1.179	2.2642	8.4993e-08	1.6208e-06	sp|Q9C7N4|GDL15_ARATH GDSL esterase/lipase At1g29670 OS=Arabidopsis thaliana GN=At1g29670 PE=2 SV=1//4.85357e-179
Csa6M418410	66.9417	29.5816	1.1782	2.26294	0.00259	0.015755	sp|Q9SYK9|U74E2_ARATH UDP-glycosyltransferase 74E2 OS=Arabidopsis thaliana GN=UGT74E2 PE=1 SV=1//2.25606e-132
Csa3M610810	1828.98	809.237	1.1764	2.26012	8.516e-26	1.3366e-23	sp|Q9M0G7|PXL2_ARATH Leucine-rich repeat receptor-like protein kinase PXL2 OS=Arabidopsis thaliana GN=PXL2 PE=2 SV=1//0
Csa7M451370	1325.05	586.926	1.1748	2.25762	2.0712e-22	2.6198e-20	-//-
Csa6M401340	130.298	57.8725	1.1709	2.25152	0.0045042	0.024943	sp|Q9SX25|CXE6_ARATH Probable carboxylesterase 6 OS=Arabidopsis thaliana GN=CXE6 PE=2 SV=1//1.68857e-47
Csa1M032450	3823.74	1699.88	1.1696	2.24949	7.8109e-06	9.9528e-05	sp|Q9FMK7|BT1_ARATH BTB/POZ and TAZ domain-containing protein 1 OS=Arabidopsis thaliana GN=BT1 PE=1 SV=1//6.78699e-123
Csa4M028470	238.713	106.138	1.1693	2.24903	6.0832e-08	1.2023e-06	sp|Q5HZ05|TPPJ_ARATH Probable trehalose-phosphate phosphatase J OS=Arabidopsis thaliana GN=TPPJ PE=1 SV=1//2.30447e-177
Csa4M008780	1777.32	790.962	1.168	2.247	6.4691e-05	0.00065185	sp|P45730|PALY_POPTR Phenylalanine ammonia-lyase OS=Populus trichocarpa GN=PAL PE=2 SV=1//0
Csa5M633250	1921.12	854.99	1.168	2.247	1.8452e-23	2.4798e-21	-//-
Csa2M416240	131.057	58.3704	1.1669	2.24529	0.00139	0.0093843	sp|Q339N5|CSLH1_ORYSJ Cellulose synthase-like protein H1 OS=Oryza sativa subsp. japonica GN=CSLH1 PE=2 SV=2//0
Csa3M690300	78.5195	34.978	1.1666	2.24482	0.0011853	0.0082378	-//-
Csa6M160180	3172.95	1416.01	1.164	2.24078	6.3751e-08	1.2531e-06	ACCO_PRUMU 1-aminocyclopropane-1-carboxylate oxidase,ACC oxidase
Csa4M641520	5028.65	2244.5	1.1638	2.24047	1.1481e-27	2.1062e-25	sp|Q9STX0|WRKY7_ARATH Probable WRKY transcription factor 7 OS=Arabidopsis thaliana GN=WRKY7 PE=2 SV=1//4.5367e-77
Csa3M251950	430.328	192.127	1.1634	2.23985	1.599e-06	2.3583e-05	-//-
Csa5M221940	1451.17	647.991	1.1632	2.23954	8.2606e-14	4.3218e-12	sp|O22874|EXPA8_ARATH Expansin-A8 OS=Arabidopsis thaliana GN=EXPA8 PE=2 SV=1//1.49191e-125
Csa7M433230	311.457	139.13	1.1626	2.23861	2.2529e-09	5.872e-08	-//-
Csa6M365200	438.984	196.14	1.1623	2.23814	7.7505e-12	3.1505e-10	-//-
Csa3M874380	5631.7	2516.68	1.162	2.23767	2.6663e-05	0.00029447	sp|Q0JIL1|NRX2_ORYSJ Probable nucleoredoxin 2 OS=Oryza sativa subsp. japonica GN=Os01g0794400 PE=2 SV=1//2.70672e-120
Csa1M426980	785.619	351.164	1.1617	2.23721	1.9473e-05	0.00022284	sp|Q9SV15|WRK11_ARATH Probable WRKY transcription factor 11 OS=Arabidopsis thaliana GN=WRKY11 PE=2 SV=2//2.02961e-76
Csa4M361820	8168.26	3663	1.157	2.22993	1.0762e-10	3.6047e-09	sp|Q39013|NAC2_ARATH NAC domain-containing protein 2 OS=Arabidopsis thaliana GN=NAC002 PE=2 SV=2//1.40275e-130
Csa1M038330	715.68	321.218	1.1558	2.22808	5.6491e-16	3.796e-14	sp|O13737|YDR2_SCHPO Uncharacterized endoplasmic reticulum membrane protein C16E8.02 OS=Schizosaccharomyces pombe (strain 972 / ATCC 24843) GN=SPAC16E8.02 PE=4 SV=2//2.0792e-20
Csa1M002110	2270.97	1019.35	1.1557	2.22792	3.6969e-07	6.1386e-06	sp|Q8RYJ8|CML19_ORYSJ Putative calcium-binding protein CML19 OS=Oryza sativa subsp. japonica GN=CML19 PE=3 SV=1//4.86838e-32
Csa7M451920	474.634	213.093	1.1553	2.22731	0.00067251	0.0050937	sp|Q9FZ62|PPSP2_ARATH Inorganic pyrophosphatase 2 OS=Arabidopsis thaliana GN=At1g17710 PE=2 SV=1//4.27876e-129
Csa2M381800	501.395	225.281	1.1542	2.22561	3.4037e-08	7.0784e-07	-//-
Csa6M390120	514.397	231.245	1.1535	2.22453	4.5059e-13	2.1579e-11	-//-
Csa6M499150	3895.68	1751.9	1.153	2.22376	6.9245e-24	9.5447e-22	-//-
Csa3M698470	986.231	443.58	1.1527	2.2233	1.3718e-05	0.00016378	sp|Q9FE79|RAA4C_ARATH Ras-related protein RABA4c OS=Arabidopsis thaliana GN=RABA4C PE=2 SV=1//1.4182e-124
Csa1M014330	129.032	58.1385	1.1502	2.21945	4.7697e-05	0.00049548	-//-
Csa7M343300	506.657	228.576	1.1483	2.21653	1.43e-11	5.5405e-10	sp|Q8GYN5|RIN4_ARATH RPM1-interacting protein 4 OS=Arabidopsis thaliana GN=RIN4 PE=1 SV=1//8.51877e-28
Csa7M051320	52.5173	23.7106	1.1473	2.21499	0.010386	0.048764	sp|Q93ZR6|WSD1_ARATH O-acyltransferase WSD1 OS=Arabidopsis thaliana GN=WSD1 PE=2 SV=1//1.59861e-08
Csa3M619930	136.661	61.7284	1.1466	2.21392	3.2085e-05	0.00034739	sp|Q9SVU0|YUC8_ARATH Probable indole-3-pyruvate monooxygenase YUCCA8 OS=Arabidopsis thaliana GN=YUC8 PE=2 SV=1//0
Csa3M164500	4868.94	2201.17	1.1453	2.21192	2.5415e-06	3.5954e-05	sp|Q8L9T5|ATL2_ARATH RING-H2 finger protein ATL2 OS=Arabidopsis thaliana GN=ATL2 PE=2 SV=2//1.3954e-49
Csa7M066840	261.102	118.084	1.1448	2.21115	1.0531e-06	1.6026e-05	sp|Q9LXA5|LRK91_ARATH L-type lectin-domain containing receptor kinase IX.1 OS=Arabidopsis thaliana GN=LECRK91 PE=2 SV=1//6.29486e-161
Csa6M055410	2266.07	1026	1.1432	2.2087	0.00013991	0.0012885	sp|Q9FN37|PSKR2_ARATH Phytosulfokine receptor 2 OS=Arabidopsis thaliana GN=PSKR2 PE=2 SV=1//3.74725e-70
Csa3M588470	110.55	50.096	1.1419	2.20671	0.0001688	0.0015187	sp|Q67ZU1|LIP2_ARATH Triacylglycerol lipase 2 OS=Arabidopsis thaliana GN=LIP2 PE=2 SV=1//1.42728e-160
Csa6M516960	16463	7468.06	1.1404	2.20442	2.0705e-07	3.6196e-06	sp|O65416|SKI27_ARATH F-box protein SKIP27 OS=Arabidopsis thaliana GN=SKIP27 PE=1 SV=2//3.1602e-29
Csa1M560760	4258.79	1934.51	1.1385	2.20152	5.0175e-09	1.2123e-07	-//-
Csa3M779020	628.306	285.614	1.1374	2.19984	2.0775e-14	1.1567e-12	sp|Q9SJ52|YLS9_ARATH Protein YLS9 OS=Arabidopsis thaliana GN=YLS9 PE=2 SV=1//1.50394e-52
Novel00637	2614.54	1188.94	1.1369	2.19908	7.8245e-06	9.9556e-05	--
Csa2M404800	139.878	63.6392	1.1362	2.19801	2.6512e-05	0.00029311	-//-
Csa3M133880	119.48	54.3635	1.1361	2.19786	8.8473e-05	0.0008585	sp|Q03662|GSTX1_TOBAC Probable glutathione S-transferase OS=Nicotiana tabacum PE=2 SV=1//4.51843e-29
Csa3M600020	2048.47	933.015	1.1346	2.19558	0.0012289	0.0084588	sp|Q9XJ57|CHS2_CITSI Chalcone synthase 2 OS=Citrus sinensis GN=CHS2 PE=2 SV=1//0
Csa5M577390	55.2065	25.1523	1.1342	2.19497	0.0075083	0.037793	sp|Q8LAD7|IDA_ARATH Protein IDA OS=Arabidopsis thaliana GN=IDA PE=2 SV=1//3.49406e-07
Csa5M139250	104.262	47.502	1.1341	2.19482	0.00029022	0.0024541	sp|Q2V3E2|YIPL5_ARATH Protein yippee-like At4g27740 OS=Arabidopsis thaliana GN=At4g27740 PE=3 SV=1//3.62399e-34
Csa1M042340	266.583	121.488	1.1338	2.19436	2.7422e-08	5.8095e-07	BEE3_ARATH Transcription factor BEE 3
Csa5M610520	1133.73	517.085	1.1326	2.19254	1.238e-16	8.9033e-15	sp|Q9C9F4|COLX_ARATH Putative zinc finger protein At1g68190 OS=Arabidopsis thaliana GN=At1g68190 PE=2 SV=1//1.39478e-63
Csa2M237740	4826.18	2209.55	1.1271	2.18419	1.6055e-31	4.0142e-29	-//-
Csa3M002890	4672.99	2139.4	1.1271	2.18419	5.7192e-31	1.3083e-28	sp|Q9SGU9|MGL_ARATH Methionine gamma-lyase OS=Arabidopsis thaliana GN=MGL PE=1 SV=1//0
Csa6M520480	123.873	56.7256	1.1268	2.18374	0.00010085	0.0009617	sp|D4N502|DIOX3_PAPSO Codeine O-demethylase OS=Papaver somniferum GN=CODM PE=1 SV=1//7.74944e-61
Csa7M447100	1955.93	895.869	1.1265	2.18328	1.024e-24	1.5082e-22	sp|Q41951|TIP21_ARATH Aquaporin TIP2-1 OS=Arabidopsis thaliana GN=TIP2-1 PE=1 SV=2//2.09815e-116
Csa4M269770	229.126	104.957	1.1263	2.18298	2.3753e-07	4.1158e-06	sp|O49840|APK2B_ARATH Protein kinase 2B, chloroplastic OS=Arabidopsis thaliana GN=APK2B PE=2 SV=1//7.71176e-154
Csa5M162590	409.711	187.727	1.126	2.18253	7.0228e-11	2.4357e-09	sp|Q8W4K5|VAB_ARATH VAN3-binding protein OS=Arabidopsis thaliana GN=VAB PE=1 SV=1//2.07545e-25
Csa7M414480	1810.75	830.427	1.1247	2.18056	1.5718e-23	2.1257e-21	sp|Q94K41|SDR3B_ARATH Short-chain dehydrogenase reductase 3b OS=Arabidopsis thaliana GN=SDR3b PE=2 SV=1//1.01141e-95
Csa2M372810	1508.67	693.776	1.1207	2.17452	4.5935e-19	4.2946e-17	sp|Q9SUG3|ITPK3_ARATH Inositol-tetrakisphosphate 1-kinase 3 OS=Arabidopsis thaliana GN=ITPK3 PE=1 SV=2//4.92731e-153
Csa6M152340	53.2632	24.5501	1.1174	2.16956	0.0097183	0.046305	-//-
Csa3M859700	297.012	136.953	1.1168	2.16865	1.3542e-08	3.046e-07	sp|Q9FJZ3|MAN7_ARATH Mannan endo-1,4-beta-mannosidase 7 OS=Arabidopsis thaliana GN=MAN7 PE=2 SV=1//0
Novel00661	155.479	71.7105	1.1165	2.1682	1.5437e-05	0.00018179	--
Csa5M608500	453.463	209.19	1.1162	2.16775	2.398e-11	8.8144e-10	sp|Q9SX25|CXE6_ARATH Probable carboxylesterase 6 OS=Arabidopsis thaliana GN=CXE6 PE=2 SV=1//3.59977e-119
Csa7M407550	8944.36	4127.33	1.1158	2.16715	3.7395e-07	6.2045e-06	sp|P19515|LIP_RHIMI Lipase OS=Rhizomucor miehei PE=1 SV=2//7.56792e-08
Csa1M064830	169.889	78.421	1.1153	2.1664	8.76e-06	0.00010977	sp|Q8GYA4|CRK10_ARATH Cysteine-rich receptor-like protein kinase 10 OS=Arabidopsis thaliana GN=CRK10 PE=1 SV=3//1.29567e-07
Csa2M382470	2885.39	1333.52	1.1135	2.1637	7.0967e-10	2.0132e-08	-//-
Csa3M143540	1516.87	701.292	1.113	2.16295	0.00018967	0.0016811	sp|Q6NML5|RPB7L_ARATH DNA-directed RNA polymerase subunit 7-like protein OS=Arabidopsis thaliana GN=NRPB7L PE=2 SV=1//1.41646e-35
Csa6M491610	89.7483	41.5034	1.1127	2.1625	0.00094554	0.0068365	sp|Q9SD53|Y3720_ARATH UPF0481 protein At3g47200 OS=Arabidopsis thaliana GN=At3g47200 PE=2 SV=1//6.85005e-54
Csa3M889750	1402.24	650.75	1.1076	2.15487	7.2221e-21	8.0884e-19	sp|Q9M1S3|ARP1_ARATH Probable RNA-binding protein ARP1 OS=Arabidopsis thaliana GN=ARP1 PE=2 SV=1//3.64764e-31
Csa5M623920	304.272	141.226	1.1074	2.15457	0.0010428	0.007388	sp|Q9LDH1|SIB1_ARATH Sigma factor binding protein 1, chloroplastic OS=Arabidopsis thaliana GN=SIB1 PE=1 SV=1//1.87226e-08
Csa4M003620	77.6094	36.026	1.1072	2.15427	0.0020498	0.012914	sp|Q8LGG8|USPAL_ARATH Universal stress protein A-like protein OS=Arabidopsis thaliana GN=At3g01520 PE=1 SV=2//9.22305e-12
Csa1M629780	407.597	189.273	1.1067	2.15352	1.3312e-10	4.3835e-09	-//-
Csa4M214830	12948.2	6020.97	1.1047	2.15054	1.1312e-09	3.0907e-08	sp|Q39096|ERD15_ARATH Protein EARLY RESPONSIVE TO DEHYDRATION 15 OS=Arabidopsis thaliana GN=ERD15 PE=1 SV=1//4.60049e-21
Csa6M080320	232.992	108.386	1.1041	2.14965	0.00028747	0.0024327	sp|Q9C9H7|RLP12_ARATH Receptor-like protein 12 OS=Arabidopsis thaliana GN=RLP12 PE=2 SV=2//3.22598e-95
Novel00142	2106.19	980.167	1.1035	2.14875	1.0124e-05	0.00012483	--
Csa1M005690	3968.6	1847.2	1.1033	2.14846	2.7472e-20	2.8538e-18	sp|C0SVV6|CB60A_ARATH Calmodulin-binding protein 60 A OS=Arabidopsis thaliana GN=CBP60A PE=2 SV=1//5.30996e-105
Csa6M450940	87.4013	40.6873	1.1031	2.14816	0.00092301	0.0066939	sp|Q7PC84|AB39G_ARATH ABC transporter G family member 39 OS=Arabidopsis thaliana GN=ABCG39 PE=3 SV=1//0
Csa5M219390	232.849	108.466	1.1021	2.14667	2.884e-07	4.8908e-06	sp|Q8VZR7|PTR30_ARATH Protein NRT1/ PTR FAMILY 5.1 OS=Arabidopsis thaliana GN=NPF5.1 PE=2 SV=2//0
Csa2M379900	102.236	47.6584	1.1011	2.14518	0.00042979	0.0034356	sp|Q93NG3|DHPH_ARTNI 2,6-dihydroxypyridine 3-monooxygenase OS=Arthrobacter nicotinovorans GN=dhpH PE=1 SV=1//5.78887e-17
Csa6M511770	3779.7	1767.9	1.0962	2.13791	4.4801e-14	2.4024e-12	sp|Q9D099|ACER3_MOUSE Alkaline ceramidase 3 OS=Mus musculus GN=Acer3 PE=2 SV=1//8.72352e-15
Csa1M481200	3064.54	1433.57	1.0961	2.13776	5.2845e-06	6.9799e-05	sp|Q9LZD3|E70A1_ARATH Exocyst complex component EXO70A1 OS=Arabidopsis thaliana GN=EXO70A1 PE=1 SV=1//1.52849e-77
Csa6M307410	69.3914	32.4883	1.0948	2.13583	0.0035994	0.020662	sp|Q0WMZ5|OP162_ARATH Outer envelope pore protein 16-2, chloroplastic OS=Arabidopsis thaliana GN=OEP162 PE=2 SV=1//5.46254e-60
Csa4M193250	52.23	24.4692	1.0939	2.1345	0.0099653	0.047239	sp|Q9FLJ2|NC100_ARATH NAC domain-containing protein 100 OS=Arabidopsis thaliana GN=NAC100 PE=2 SV=1//7.28905e-80
Csa5M203400	2156.48	1010.63	1.0934	2.13376	1.7223e-07	3.0632e-06	sp|Q9LY50|ACCR3_ARATH Putative serine/threonine-protein kinase-like protein CCR3 OS=Arabidopsis thaliana GN=CCR3 PE=2 SV=1//0
Csa3M149910	758.905	356.196	1.0912	2.13051	4.5891e-15	2.7642e-13	-//-
Csa6M487550	104.344	48.9958	1.0906	2.12963	0.0004717	0.0037304	sp|Q9FVS9|C96AF_ARATH Alkane hydroxylase MAH1 OS=Arabidopsis thaliana GN=CYP96A15 PE=2 SV=1//5.04635e-148
Csa6M486710	217.535	102.311	1.0883	2.12623	0.0014305	0.0096033	-//-
Csa4M641000	99.2596	46.7147	1.0873	2.12476	0.00055939	0.0043471	sp|Q9SND9|Y3028_ARATH Uncharacterized acetyltransferase At3g50280 OS=Arabidopsis thaliana GN=At3g50280 PE=3 SV=1//1.27216e-29
Csa5M647530	2293.58	1079.56	1.0872	2.12461	6.0155e-12	2.4853e-10	sp|Q40392|TMVRN_NICGU TMV resistance protein N OS=Nicotiana glutinosa GN=N PE=1 SV=1//5.1339e-138
Csa7M432600	13122.3	6176.31	1.0872	2.12461	1.3163e-33	3.7111e-31	sp|Q41142|PLDA1_RICCO Phospholipase D alpha 1 OS=Ricinus communis GN=PLD1 PE=1 SV=1//0
Csa6M511060	268.081	126.254	1.0863	2.12329	1.9067e-05	0.00021855	sp|Q8GYX3|MP705_ARATH Microtubule-associated protein 70-5 OS=Arabidopsis thaliana GN=MAP70.5 PE=1 SV=1//6.62728e-173
Csa6M016950	836.891	394.543	1.0849	2.12123	3.1408e-06	4.36e-05	sp|Q9FIJ6|ACCR4_ARATH Serine/threonine-protein kinase-like protein CCR4 OS=Arabidopsis thaliana GN=CCR4 PE=1 SV=1//0
Csa3M750350	749.859	354.442	1.0811	2.11565	1.0044e-14	5.7902e-13	sp|Q8GYY1|HSFA3_ARATH Heat stress transcription factor A-3 OS=Arabidopsis thaliana GN=HSFA3 PE=2 SV=2//6.88648e-77
Csa7M070830	61.3786	29.0549	1.079	2.11257	0.0063252	0.032845	-//-
Novel00652	1011.58	479.543	1.0769	2.1095	5.5283e-09	1.3282e-07	--
Csa4M064650	198.991	94.4486	1.0751	2.10687	2.4854e-06	3.523e-05	sp|P49332|GSTXC_TOBAC Probable glutathione S-transferase parC OS=Nicotiana tabacum GN=PARC PE=2 SV=1//2.60884e-114
Csa2M422050	178.976	85.0219	1.0739	2.10512	9.579e-06	0.00011872	sp|Q9LJ45|CCU11_ARATH Cyclin-U1-1 OS=Arabidopsis thaliana GN=CYCU1-1 PE=1 SV=1//8.14497e-64
Csa3M146340	585.601	278.383	1.0728	2.10351	1.4544e-12	6.6398e-11	sp|Q9SV13|SUT31_ARATH Sulfate transporter 3.1 OS=Arabidopsis thaliana GN=SULTR3;1 PE=2 SV=1//0
Csa4M172540	3671.6	1748.21	1.0705	2.10016	8.696e-12	3.5215e-10	sp|Q38873|CDPK7_ARATH Calcium-dependent protein kinase 7 OS=Arabidopsis thaliana GN=CPK7 PE=2 SV=1//0
Csa2M352430	366.718	174.705	1.0698	2.09914	2.4557e-09	6.3543e-08	sp|P46639|KNAT1_ARATH Homeobox protein knotted-1-like 1 OS=Arabidopsis thaliana GN=KNAT1 PE=1 SV=1//5.4972e-97
Csa6M365210	2337.42	1113.73	1.0695	2.09871	6.834e-09	1.6184e-07	sp|Q9CAG8|FBK28_ARATH F-box/kelch-repeat protein At1g67480 OS=Arabidopsis thaliana GN=At1g67480 PE=2 SV=1//1.66384e-140
Csa2M249270	2604.35	1242.9	1.0672	2.09536	1.2034e-11	4.7051e-10	sp|Q8GYX8|DNJ10_ARATH Chaperone protein dnaJ 10 OS=Arabidopsis thaliana GN=ATJ10 PE=2 SV=2//1.42201e-121
Csa5M604130	949.459	453.163	1.0671	2.09522	2.1781e-05	0.00024573	-//-
Csa3M739050	656.169	313.546	1.0654	2.09275	1.5606e-10	5.0614e-09	-//-
Csa5M155590	1265.01	604.828	1.0646	2.09159	1.6608e-18	1.4942e-16	sp|Q29Q28|UTR2_ARATH UDP-galactose/UDP-glucose transporter 2 OS=Arabidopsis thaliana GN=UTR2 PE=2 SV=1//0
Csa6M518320	1121.39	536.407	1.0639	2.09058	1.1504e-17	9.2854e-16	sp|Q9FJ41|GDL85_ARATH GDSL esterase/lipase At5g45950 OS=Arabidopsis thaliana GN=At5g45950 PE=2 SV=1//3.35132e-114
Csa6M504590	268.923	128.673	1.0635	2.09	1.6949e-07	3.0246e-06	sp|Q9M066|C90C1_ARATH 3-epi-6-deoxocathasterone 23-monooxygenase OS=Arabidopsis thaliana GN=ROT3 PE=2 SV=3//0
Csa2M408940	2955.58	1414.67	1.063	2.08927	4.4425e-09	1.0893e-07	-//-
Csa6M128000	5038.99	2414.36	1.0615	2.0871	1.3272e-13	6.7152e-12	sp|Q9ZT82|CALSC_ARATH Callose synthase 12 OS=Arabidopsis thaliana GN=CALS12 PE=2 SV=1//0
Csa6M080330	417.423	200.042	1.0612	2.08667	4.8241e-10	1.4113e-08	sp|Q9C9H7|RLP12_ARATH Receptor-like protein 12 OS=Arabidopsis thaliana GN=RLP12 PE=2 SV=2//1.64773e-23
Csa6M154530	55.2065	26.4609	1.061	2.08638	0.010502	0.049212	-//-
Csa4M006220	86.9565	41.7119	1.0598	2.08464	0.001685	0.011032	sp|Q42556|PMA9_ARATH ATPase 9, plasma membrane-type OS=Arabidopsis thaliana GN=AHA9 PE=2 SV=2//2.39095e-38
Csa2M377910	95.5166	45.8518	1.0588	2.0832	0.001042	0.0073849	sp|Q8VZQ0|NRX3_ARATH Probable nucleoredoxin 3 OS=Arabidopsis thaliana GN=At4g31240 PE=2 SV=1//1.48523e-153
Csa1M022530	1245.03	598.107	1.0577	2.08161	1.9295e-18	1.7179e-16	-//-
Csa6M517960	224.836	108.026	1.0575	2.08132	1.4234e-06	2.108e-05	sp|Q38741|SBP1_ANTMA Squamosa promoter-binding protein 1 OS=Antirrhinum majus GN=SBP1 PE=2 SV=1//2.12278e-34
Csa6M127320	513.794	246.926	1.0571	2.08074	0.0072405	0.036642	sp|Q9FIW5|NAC94_ARATH Putative NAC domain-containing protein 94 OS=Arabidopsis thaliana GN=ANAC094 PE=3 SV=1//2.08813e-48
Csa4M008250	466.026	223.99	1.057	2.0806	3.4698e-06	4.7736e-05	sp|P45730|PALY_POPTR Phenylalanine ammonia-lyase OS=Populus trichocarpa GN=PAL PE=2 SV=1//7.77631e-155
Csa1M560750	3530.06	1697.94	1.0559	2.07901	2.9796e-26	4.8909e-24	-//-
Csa4M640970	62.8361	30.2359	1.0553	2.07815	0.0077297	0.038646	sp|Q9SND9|Y3028_ARATH Uncharacterized acetyltransferase At3g50280 OS=Arabidopsis thaliana GN=At3g50280 PE=3 SV=1//1.4967e-83
Csa7M236280	175.069	84.3909	1.0528	2.07455	1.4253e-05	0.00016971	sp|Q93WV4|WRK71_ARATH Probable WRKY transcription factor 71 OS=Arabidopsis thaliana GN=WRKY71 PE=2 SV=1//6.58048e-42
Csa2M354100	2206.89	1064.2	1.0522	2.07369	1.1667e-22	1.4933e-20	sp|Q058P4|PUB30_ARATH U-box domain-containing protein 30 OS=Arabidopsis thaliana GN=PUB30 PE=2 SV=1//5.51699e-177
Csa5M604920	4526.57	2186.71	1.0497	2.0701	1.3034e-27	2.3355e-25	sp|Q8LC03|ATB13_ARATH Homeobox-leucine zipper protein ATHB-13 OS=Arabidopsis thaliana GN=ATHB-13 PE=2 SV=2//1.26809e-110
Csa7M452880	1691.5	819.717	1.0451	2.06351	6.3777e-10	1.831e-08	sp|Q8S9H7|DIV_ANTMA Transcription factor DIVARICATA OS=Antirrhinum majus GN=DIVARICATA PE=2 SV=1//8.64275e-31
Csa2M428380	924.99	448.919	1.043	2.06051	8.1706e-06	0.00010347	sp|O22176|WRK15_ARATH Probable WRKY transcription factor 15 OS=Arabidopsis thaliana GN=WRKY15 PE=2 SV=1//5.03267e-68
Csa3M727960	4516	2193.43	1.0419	2.05894	2.1803e-16	1.5075e-14	sp|Q9SVG9|CML42_ARATH Calcium-binding protein CML42 OS=Arabidopsis thaliana GN=CML42 PE=1 SV=1//8.79111e-57
Csa3M146510	1120	544.606	1.0402	2.05651	0.0037664	0.021459	sp|P05332|YP20_BACLI Uncharacterized N-acetyltransferase p20 OS=Bacillus licheniformis GN=p20 PE=3 SV=1//5.47483e-21
Csa6M182110	2048.42	997.305	1.0384	2.05395	1.2114e-21	1.4717e-19	sp|Q9SIZ4|Y2027_ARATH Inactive receptor-like serine/threonine-protein kinase At2g40270 OS=Arabidopsis thaliana GN=At2g40270 PE=2 SV=2//2.1302e-140
Csa3M684170	376.264	183.199	1.0383	2.05381	5.2409e-09	1.2648e-07	sp|Q7XBQ9|RGA2_SOLBU Disease resistance protein RGA2 OS=Solanum bulbocastanum GN=RGA2 PE=1 SV=1//6.95506e-115
Csa4M361860	284.866	138.807	1.0372	2.05224	0.0047781	0.02611	sp|Q0IU52|ASP1_ORYSJ Aspartic proteinase Asp1 OS=Oryza sativa subsp. japonica GN=ASP1 PE=2 SV=1//1.23621e-89
Csa2M264630	4989.64	2435.11	1.0349	2.04897	1.25e-11	4.8783e-10	sp|F4I9E1|NFD4_ARATH Protein NUCLEAR FUSION DEFECTIVE 4 OS=Arabidopsis thaliana GN=NFD4 PE=3 SV=1//9.33458e-41
Csa5M602230	1961.24	957.65	1.0342	2.04798	2.3274e-21	2.773e-19	sp|Q58G01|LHWL3_ARATH Transcription factor bHLH155 OS=Arabidopsis thaliana GN=BHLH155 PE=2 SV=1//8.47306e-14
Csa3M150740	1213.23	592.827	1.0332	2.04656	1.104e-17	8.9586e-16	sp|Q42910|PPDK_MESCR Pyruvate, phosphate dikinase, chloroplastic OS=Mesembryanthemum crystallinum GN=PPD PE=2 SV=1//0
Csa3M149330	316.001	154.608	1.0313	2.04387	4.5407e-08	9.2548e-07	sp|Q3E936|MAKR1_ARATH Probable membrane-associated kinase regulator 1 OS=Arabidopsis thaliana GN=MAKR1 PE=1 SV=1//1.55267e-13
Csa5M645140	68.1186	33.3278	1.0313	2.04387	0.0067121	0.034422	sp|P85801|TRXH_POPJC Thioredoxin H-type OS=Populus jackii PE=1 SV=1//1.38644e-46
Csa4M642460	10052.3	4918.86	1.0311	2.04358	0.00063467	0.0048431	sp|Q96289|ZAT10_ARATH Zinc finger protein ZAT10 OS=Arabidopsis thaliana GN=ZAT10 PE=2 SV=1//3.55685e-55
Csa3M203270	1078.37	528.242	1.0296	2.04146	4.1241e-14	2.217e-12	sp|Q9FXA4|PUB26_ARATH U-box domain-containing protein 26 OS=Arabidopsis thaliana GN=PUB26 PE=2 SV=1//4.89334e-170
Csa7M048060	1606.21	787.011	1.0292	2.04089	0.00010521	0.0010002	-//-
Csa6M425740	1669.59	820.05	1.0257	2.03595	0.00030972	0.0025924	sp|Q2V3R1|FB346_ARATH F-box protein At3g44326 OS=Arabidopsis thaliana GN=At3g44326 PE=2 SV=1//3.81131e-61
Novel00521	244.317	120.005	1.0257	2.03595	1.4375e-06	2.1273e-05	--
Csa1M024150	67.0443	32.9341	1.0255	2.03566	0.0069845	0.035522	BEE3_ARATH Transcription factor BEE 3.BR Enhanced Expression 3
Csa1M042540	116.893	57.4321	1.0253	2.03538	0.003089	0.018223	sp|Q3ECH2|Y1670_ARATH Probable receptor-like protein kinase At1g67000 OS=Arabidopsis thaliana GN=At1g67000 PE=2 SV=2//8.37094e-09
Csa6M085100	93.5939	46.0082	1.0245	2.03425	0.0015126	0.010052	-//-
Csa2M435460	316.548	155.974	1.0211	2.02947	7.076e-08	1.3757e-06	sp|Q7XBQ9|RGA2_SOLBU Disease resistance protein RGA2 OS=Solanum bulbocastanum GN=RGA2 PE=1 SV=1//6.70355e-81
Csa6M292430	499.753	246.254	1.0211	2.02947	1.0379e-10	3.4907e-09	sp|Q94KB7|MLO6_ARATH MLO-like protein 6 OS=Arabidopsis thaliana GN=MLO6 PE=2 SV=2//0
Csa5M610470	3404.34	1678.07	1.0206	2.02876	4.3428e-10	1.281e-08	sp|Q9XI60|LPP2_ARATH Lipid phosphate phosphatase 2 OS=Arabidopsis thaliana GN=LPP2 PE=2 SV=1//3.39928e-107
Csa7M405820	1412	696	1.0206	2.02876	3.5556e-18	3.0582e-16	sp|Q9SRX4|PME7_ARATH Probable pectinesterase/pectinesterase inhibitor 7 OS=Arabidopsis thaliana GN=PME7 PE=2 SV=1//0
Csa4M638320	822.857	405.729	1.0201	2.02806	5.767e-10	1.669e-08	sp|P24805|TSJT1_TOBAC Stem-specific protein TSJT1 OS=Nicotiana tabacum GN=TSJT1 PE=2 SV=1//1.03212e-29
Csa2M000350	184.3	90.8875	1.0199	2.02778	1.5106e-05	0.00017833	sp|Q8S8S7|PUB34_ARATH U-box domain-containing protein 34 OS=Arabidopsis thaliana GN=PUB34 PE=3 SV=1//6.23683e-14
Csa2M008110	537.128	265.181	1.0183	2.02553	5.9511e-11	2.0876e-09	sp|O82730|MGDG2_ARATH Monogalactosyldiacylglycerol synthase 2, chloroplastic OS=Arabidopsis thaliana GN=MGD2 PE=1 SV=1//0
Csa7M420780	105.698	52.192	1.0181	2.02525	0.00088659	0.0064647	sp|Q0WPR4|SCP34_ARATH Serine carboxypeptidase-like 34 OS=Arabidopsis thaliana GN=SCPL34 PE=2 SV=2//0
Csa6M426370	352.219	173.952	1.0178	2.02483	2.393e-08	5.1251e-07	sp|Q84TG3|PUB23_ARATH E3 ubiquitin-protein ligase PUB23 OS=Arabidopsis thaliana GN=PUB23 PE=1 SV=1//2.54206e-132
Csa3M825090	552.449	273.004	1.0169	2.02357	2.5739e-11	9.4288e-10	sp|H2DH21|C7A29_PANGI Cytochrome P450 CYP72A219 OS=Panax ginseng PE=2 SV=1//2.76696e-42
Csa7M405890	553.42	273.588	1.0164	2.02286	3.6049e-11	1.2877e-09	sp|Q6NM26|DI196_ARATH Protein DEHYDRATION-INDUCED 19 homolog 6 OS=Arabidopsis thaliana GN=DI19-6 PE=1 SV=1//1.95579e-28
Csa6M500400	154.993	76.7421	1.0141	2.01964	7.435e-05	0.00073539	sp|Q9LFT9|RAH1E_ARATH Ras-related protein RABH1e OS=Arabidopsis thaliana GN=RABH1E PE=2 SV=1//6.03066e-128
Csa2M014830	373.527	184.966	1.014	2.0195	1.7445e-06	2.5483e-05	sp|Q9T048|DRL27_ARATH Disease resistance protein At4g27190 OS=Arabidopsis thaliana GN=At4g27190 PE=2 SV=1//1.17613e-62
Csa1M168870	165.599	82.0109	1.0138	2.01922	5.2755e-05	0.00054251	sp|Q9XIN7|NAC40_ARATH NAC domain-containing protein 40 OS=Arabidopsis thaliana GN=NTL8 PE=1 SV=1//1.03399e-82
Csa1M265630	1637.77	811.193	1.0136	2.01894	0.0016679	0.010935	-//-
Csa5M637680	1922.79	952.762	1.013	2.0181	2.6898e-20	2.8077e-18	sp|Q9LJW0|PHO19_ARATH Phosphate transporter PHO1 homolog 9 OS=Arabidopsis thaliana GN=PHO1-H9 PE=2 SV=1//0
Csa5M585990	1690.62	838.274	1.0121	2.01684	7.5634e-15	4.4436e-13	sp|Q9BSJ8|ESYT1_HUMAN Extended synaptotagmin-1 OS=Homo sapiens GN=ESYT1 PE=1 SV=1//7.51689e-12
Csa6M087850	7839.37	3887.33	1.012	2.0167	2.2999e-17	1.7537e-15	sp|Q9ZPY9|P4KG4_ARATH Phosphatidylinositol 4-kinase gamma 4 OS=Arabidopsis thaliana GN=PI4KG4 PE=1 SV=1//0
Csa6M160690	239.78	118.9	1.012	2.0167	1.702e-06	2.493e-05	-//-
Csa3M825080	404.072	200.587	1.0104	2.01447	3.1425e-09	7.9403e-08	sp|Q05047|C72A1_CATRO Secologanin synthase OS=Catharanthus roseus GN=CYP72A1 PE=2 SV=1//1.89889e-49
Csa4M011070	123.585	61.3635	1.0101	2.01405	0.00039627	0.003199	-//-
Csa3M457660	303.732	151.012	1.0081	2.01126	2.5717e-07	4.4205e-06	sp|Q9C7A2|Y3236_ARATH Ankyrin repeat-containing protein At3g12360 OS=Arabidopsis thaliana GN=At3g12360 PE=2 SV=1//3.05656e-09
Csa6M499090	3521.47	1751.71	1.0074	2.01028	0.00094614	0.0068386	sp|Q9SJY5|PUMP5_ARATH Mitochondrial uncoupling protein 5 OS=Arabidopsis thaliana GN=PUMP5 PE=2 SV=1//4.0215e-150
Csa5M647510	562.274	279.819	1.0068	2.00945	9.0235e-06	0.0001128	sp|Q40392|TMVRN_NICGU TMV resistance protein N OS=Nicotiana glutinosa GN=N PE=1 SV=1//1.62287e-170
Novel00508	192.183	95.6872	1.0061	2.00847	1.5777e-05	0.00018508	--
Csa1M046830	2214.94	1103.03	1.0058	2.00806	1.1652e-05	0.00014196	-//-
Csa3M199020	187.653	93.539	1.0044	2.00611	2.0877e-05	0.00023665	sp|Q39266|ZFP7_ARATH Zinc finger protein 7 OS=Arabidopsis thaliana GN=ZFP7 PE=2 SV=1//1.69478e-18
Csa7M394060	1372.69	684.25	1.0044	2.00611	1.8028e-11	6.8012e-10	-//-
Csa5M611750	265.933	132.599	1.004	2.00555	6.2494e-07	9.9911e-06	sp|Q9SZN7|HIP26_ARATH Heavy metal-associated isoprenylated plant protein 26 OS=Arabidopsis thaliana GN=HIPP26 PE=1 SV=1//4.00313e-33
Csa7M448750	123.462	61.6241	1.0025	2.00347	0.00039471	0.0031932	sp|Q9LJX0|AB19B_ARATH ABC transporter B family member 19 OS=Arabidopsis thaliana GN=ABCB19 PE=1 SV=1//9.23337e-103
Csa6M446470	4108.49	2052.7	1.0011	2.00153	2.3447e-07	4.0692e-06	sp|Q9SZN7|HIP26_ARATH Heavy metal-associated isoprenylated plant protein 26 OS=Arabidopsis thaliana GN=HIPP26 PE=1 SV=1//8.44841e-06
Csa1M435810	0	14.1221	Inf	Inf	0.00012747	0.001184	unknown protein
Csa1M561410	0	23.7627	Inf	Inf	2.4101e-07	4.1692e-06	NAS4_ARATH Probable nicotianamine synthase 4
Csa5M313340	0	17.5789	Inf	Inf	0.00037385	0.0030485	sp|Q9SPV4|SAMT_CLABR Salicylate carboxymethyltransferase OS=Clarkia breweri GN=SAMT PE=1 SV=1//1.34383e-94
Novel00325	0	10.1386	Inf	Inf	0.0031683	0.018615	--
Csa5M172270	11.9609	472.178	-5.3029	-39.4759	2.7191e-72	6.4964e-69	Gibberellin 20 oxidase 1 OS=Arabidopsis thaliana
Csa4M642430	0.465302	16.4033	-5.1397	-35.2536	0.0022832	0.014161	LBD38_ARATH LOB domain-containing protein 38
Csa5M606780	16.1076	494.291	-4.9395	-30.6858	8.6138e-65	1.4248e-61	sp|Q8L925|CRC_ARATH Protein CRABS CLAW OS=Arabidopsis thaliana GN=CRC PE=1 SV=2//2.70789e-58
Csa1M703060	1.41643	34.2428	-4.5955	-24.1759	6.557e-08	1.2841e-06	P2A04_ARATH Uncharacterized protein PHLOEM PROTEIN 2-LIKE A4
Csa7M067390	0.465302	9.98217	-4.4231	-21.4529	0.0077796	0.038858	-//-
CsaUNM013090	24.6062	503.575	-4.3551	-20.4652	0.0011606	0.0080843	sp|Q84WS0|SBT11_ARATH Subtilisin-like protease SBT1.1 OS=Arabidopsis thaliana GN=SBTI1.1 PE=1 SV=1//0
Csa6M476070	12.8505	216.521	-4.0746	-16.8491	3.9339e-37	1.4099e-34	GAOX2_ARATH Gibberellin 20 oxidase 2
Novel00376	1.43696	23.8957	-4.0557	-16.6298	2.0589e-05	0.00023388	--
Csa6M085120	14.5886	240.519	-4.0432	-16.4863	0.0011483	0.0080115	-//-
Csa6M445090	0.971653	15.7723	-4.0208	-16.2324	0.000773	0.0057525	sp|Q8H5N9|PIP21_ORYSJ Probable aquaporin PIP2-1 OS=Oryza sativa subsp. japonica GN=PIP2-1 PE=2 SV=1//1.48746e-93
Csa3M098550	1.45748	20.2016	-3.7929	-13.8604	0.00015665	0.0014183	DFRA_MALDO Bifunctional dihydroflavonol 4-reductase/flavanone 4-reductase
Csa6M085110	27.9454	351.233	-3.6517	-12.5681	5.0104e-15	3.0095e-13	sp|Q66S17|NATT3_THANI Natterin-3 OS=Thalassophryne nattereri PE=1 SV=1//7.70409e-06
Csa2M060500	0.951129	11.0302	-3.5357	-11.5972	0.010555	0.049403	ORP4B_ARATH Oxysterol-binding protein-related protein 4B
Csa5M622440	52.9964	590.483	-3.4779	-11.1417	1.8544e-11	6.9833e-10	-//-
Csa3M026660	17.442	189.996	-3.4453	-10.8928	0.00018909	0.0016781	LBP65_ARATH Putative lipid-binding protein At4g00165
Novel00239	1.92278	19.3621	-3.332	-10.0701	0.00061365	0.0047023	--
Csa4M047950	7.14373	71.6009	-3.3252	-10.0227	0.00018929	0.0016791	SBT33_ARATH Subtilisin-like protease SBT3.3
Csa7M039280	7.12321	66.8875	-3.2311	-9.38984	1.91e-10	6.0757e-09	sp|B6VJS4|ROMT_VITVI Trans-resveratrol di-O-methyltransferase OS=Vitis vinifera GN=ROMT PE=1 SV=2//5.20742e-145
Csa2M307340	14.6912	135.894	-3.2095	-9.2503	2.9582e-06	4.1225e-05	Probable trehalose-phosphate phosphatase D
Csa3M183950	1778.22	15658.4	-3.1384	-8.80547	9.3527e-23	1.2115e-20	HSP83_IPONI Heat shock protein 83
Csa1M580750	22.786	194.252	-3.0917	-8.525	3.498e-25	5.3345e-23	1A17_ARATH 1-aminocyclopropane-1-carboxylate synthase 7
Csa4M303700	323.11	2662.79	-3.0428	-8.24089	2.0161e-103	4.3351e-99	HS17C_ARATH 17.6 kDa class I heat shock protein 3
Novel00418	8.09486	62.8051	-2.9558	-7.75862	3.6407e-09	9.1288e-08	--
Csa4M000830	24.2846	177.594	-2.8705	-7.31319	3.6758e-14	1.9909e-12	-//-
Csa3M149380	39.7627	286.13	-2.8472	-7.19602	6.4479e-27	1.1092e-24	FAF3_ARATH Protein FANTASTIC FOUR 3
Csa3M020080	4822.18	33436.1	-2.7936	-6.93358	1.0496e-27	1.9457e-25	HS23C_OXYRB Small heat shock protein, chloroplastic
Csa2M247060	9.47024	65.5501	-2.7911	-6.92157	1.858e-05	0.00021354	RAD_ANTMA Transcription factor RADIALIS
Csa1M305710	8.03329	55.5733	-2.7903	-6.91774	9.4996e-08	1.7875e-06	Cytochrome P450
Csa2M070310	275.178	1796.37	-2.7067	-6.52827	9.5859e-101	1.0306e-96	HSP70_SOYBN Heat shock 70 kDa protein
Csa6M465000	5.20042	33.6927	-2.6957	-6.47868	6.0891e-05	0.00061645	-//-
Csa3M733980	3.33921	21.5624	-2.6909	-6.45716	0.0014954	0.0099525	RBE_ARATH Probable transcriptional regulator RABBIT EARS
Csa2M362450	57.0267	358.308	-2.6515	-6.2832	1.1174e-09	3.061e-08	CKX5_ARATH Cytokinin dehydrogenase 5
Csa4M501830	8.07433	48.8395	-2.5966	-6.04859	1.7565e-06	2.5606e-05	P2A04_ARATH Uncharacterized protein PHLOEM PROTEIN 2-LIKE A4
Csa5M161900	184.348	1112.54	-2.5934	-6.03519	5.6343e-10	1.6328e-08	ERLI1_ARATH Lipid transfer protein EARLI 1
Csa3M903530	37.9425	227.621	-2.5847	-5.99891	3.1004e-09	7.8432e-08	BAMO_GLYUR Beta-amyrin 11-oxidase
Csa2M006080	3.33921	20.0165	-2.5836	-5.99434	0.0030087	0.017852	ZRAB2_CHICK Zinc finger Ran-binding domain-containing protein 2
Csa5M198120	68.5018	410.369	-2.5827	-5.9906	7.4444e-20	7.5153e-18	sp|P02519|HSP11_SOYBN 17.3 kDa class I heat shock protein OS=Glycine max GN=HSP17.3-B PE=3 SV=1//2.51912e-60
Csa7M312930	363.626	2130.61	-2.5507	-5.85918	1.9507e-99	1.3982e-95	sp|Q02028|HSP7S_PEA Stromal 70 kDa heat shock-related protein, chloroplastic OS=Pisum sativum GN=HSP70 PE=2 SV=1//0
Csa6M507520	2.81234	16.2702	-2.5324	-5.78533	0.0093324	0.044853	sp|P06215|CHIT_PHAVU Endochitinase OS=Phaseolus vulgaris PE=1 SV=1//1.27389e-142
Csa3M825060	18.7352	107.32	-2.5181	-5.72827	3.3294e-11	1.1992e-09	RNMC_MOMCH Ribonuclease MC
Csa3M853150	3.76347	21.5103	-2.5149	-5.71558	0.0025268	0.015423	C82A4_SOYBN Cytochrome P450 82A4
Csa7M434970	22.6013	128.389	-2.506	-5.68043	7.7834e-06	9.9327e-05	sp|O24648|G3OX_PEA Gibberellin 3-beta-dioxygenase 1 OS=Pisum sativum GN=LE PE=1 SV=1//2.84598e-152
Csa3M009550	90.5147	492.419	-2.4437	-5.44035	2.6255e-39	1.0652e-36	Glycine-rich cell wall structural protein 1
Csa1M032990	14.7528	80.2276	-2.4431	-5.43809	4.487e-09	1.0989e-07	Transcription factor bHLH135
Csa5M646740	23.395	125.946	-2.4285	-5.38333	4.2461e-13	2.0426e-11	sp|Q38806|HSP22_ARATH 22.0 kDa heat shock protein OS=Arabidopsis thaliana GN=HSP22.0 PE=2 SV=1//1.36212e-56
Csa6M022340	36.6082	193.494	-2.402	-5.28535	1.9078e-18	1.7093e-16	sp|Q10993|CYTB_HELAN Cysteine proteinase inhibitor B OS=Helianthus annuus PE=1 SV=1//1.20508e-25
Csa3M893390	15.1565	80.0425	-2.4008	-5.28096	8.43e-09	1.9513e-07	BH061_ARATH Transcription factor bHLH61
Csa7M074970	115.374	609.02	-2.4002	-5.27876	1.19e-25	1.8542e-23	sp|Q6RYA0|SABP2_TOBAC Salicylic acid-binding protein 2 OS=Nicotiana tabacum GN=SABP2 PE=1 SV=1//3.80791e-54
Csa4M303720	3.33921	17.6077	-2.3986	-5.27291	0.0077377	0.038676	COPT6_ARATH Copper transporter 6
Csa5M168830	37.9631	195.631	-2.3655	-5.15331	2.9603e-07	5.0161e-06	-//-
Csa3M278920	442.699	2232.93	-2.3345	-5.04376	1.106e-88	3.3975e-85	LBD41_ARATH LOB domain-containing protein 41
Novel00440	22.3207	107.864	-2.2728	-4.8326	1.7555e-10	5.6426e-09	--
Csa3M746540	4.77617	22.7956	-2.2548	-4.77268	0.0033068	0.01927	PABP7_ARATH Polyadenylate-binding protein 7
CsaUNM014620	39.3795	186.163	-2.241	-4.72725	5.4602e-08	1.0942e-06	sp|Q941R6|MLP31_ARATH MLP-like protein 31 OS=Arabidopsis thaliana GN=MLP31 PE=2 SV=2//5.13817e-61
Csa7M259360	28.6365	135.24	-2.2396	-4.72266	5.476e-05	0.00056084	sp|B9G9L9|BURPH_ORYSJ BURP domain-containing protein 17 OS=Oryza sativa subsp. japonica GN=BURP17 PE=2 SV=1//1.87593e-45
Csa5M434550	142.553	672.778	-2.2386	-4.71939	3.4382e-08	7.1431e-07	sp|O80366|ARR9_ARATH Two-component response regulator ARR9 OS=Arabidopsis thaliana GN=ARR9 PE=1 SV=1//1.23862e-62
Csa1M423100	263.654	1210.16	-2.1985	-4.59002	2.8998e-31	7.0857e-29	Probable mitochondrial chaperone BCS1-B
Csa2M055560	21.8554	98.0438	-2.1654	-4.48591	3.0553e-09	7.7383e-08	MDL2_PRUDU (R)-mandelonitrile lyase 2
Csa4M329560	46.4206	208.213	-2.1652	-4.48529	6.6052e-17	4.8641e-15	-//-
Csa3M124790	598.089	2679.54	-2.1636	-4.48031	3.6756e-28	7.0568e-26	-//-
Csa5M381820	5.6452	25.1523	-2.1556	-4.45554	0.0031832	0.018681	sp|Q0JGS5|EAR1_ORYSJ Protein terminal ear1 homolog OS=Oryza sativa subsp. japonica GN=PLA2 PE=2 SV=1//4.84548e-18
Novel00061	24.6883	108.803	-2.1398	-4.40701	0.0060008	0.031434	--
Csa3M881680	32.4	138.337	-2.0941	-4.2696	1.0945e-11	4.3024e-10	FA32A_DANRE Protein FAM32A-like
Novel00351	20.3569	86.5391	-2.0878	-4.25099	6.5833e-08	1.2881e-06	--
Csa1M701260	10.5035	44.5953	-2.086	-4.24569	8.1517e-05	0.00079821	SBT24_ARATH Subtilisin-like protease SBT2.4
Csa3M020090	216.81	909.164	-2.0681	-4.19334	1.7689e-17	1.3731e-15	HS23C_OXYRB Small heat shock protein, chloroplastic
Csa2M354620	67.4891	282.54	-2.0657	-4.18637	2.0998e-18	1.8581e-16	unknown protein
Csa6M290810	112.555	468.588	-2.0577	-4.16322	5.1226e-26	8.2821e-24	HEL1_SCHPO E3 ubiquitin-protein ligase dbl4
Csa7M388340	8.53964	35.5281	-2.0567	-4.16034	0.00058412	0.0045084	sp|O23341|OFP11_ARATH Transcription repressor OFP11 OS=Arabidopsis thaliana GN=OFP11 PE=2 SV=1//9.50087e-13
Csa6M103510	79.1079	325.108	-2.039	-4.10961	3.7644e-10	1.1337e-08	-//-
Csa1M616330	135.984	557.842	-2.0364	-4.10221	4.729e-33	1.2711e-30	SCL3_ARATH Scarecrow-like protein 3, GRAS family transcription factor, RGA, GAI
Csa3M822100	79.2243	324.38	-2.0337	-4.09454	3.1262e-12	1.3526e-10	ARR9_ARATH Two-component response regulator ARR9
Csa6M366390	174.317	710.781	-2.0277	-4.07754	7.8472e-39	3.068e-36	sp|Q96558|UGDH1_SOYBN UDP-glucose 6-dehydrogenase 1 OS=Glycine max GN=UGD1 PE=2 SV=1//0
Csa4M643100	59.0316	240.284	-2.0252	-4.07048	1.8989e-17	1.4688e-15	-//-
Csa6M324800	6.17208	25.048	-2.0209	-4.05837	0.0046307	0.025452	sp|Q9SN86|MDHP_ARATH Malate dehydrogenase, chloroplastic OS=Arabidopsis thaliana GN=At3g47520 PE=1 SV=1//2.4795e-48
Novel00178	6.21313	25.1001	-2.0143	-4.03985	0.0045972	0.025295	-//-
Csa3M333840	5.30304	21.406	-2.0131	-4.03649	0.0088451	0.043002	MLP34_ARATH MLP-like protein 34
Csa1M246610	63.9036	253.358	-1.9872	-3.96467	1.2905e-17	1.024e-15	Transcription repressor OFP8
Csa3M016920	215.01	848.443	-1.9804	-3.94602	1.7013e-41	7.9526e-39	SGGP_ARATH Haloacid dehalogenase-like hydrolase domain-containing protein Sgpp
Csa6M127460	12.4468	48.915	-1.9745	-3.92992	8.5881e-05	0.00083523	-//-
Csa2M000460	350.283	1368.2	-1.9657	-3.90602	2.3434e-28	4.5396e-26	PAO5_ARATH Probable polyamine oxidase 5
Csa5M190530	97.1931	377.69	-1.9583	-3.88604	1.3662e-05	0.0001633	HSP12_MEDSA 18.2 kDa class I heat shock protein
Csa6M104650	44.5456	173.037	-1.9577	-3.88442	5.0876e-05	0.0005252	WTR37_ARATH WAT1-related protein At4g30420, Auxin-induced protein 5NG4
Csa5M197120	4231.76	16363	-1.9511	-3.86669	1.8671e-28	3.6833e-26	sp|P19037|HS181_ARATH 18.1 kDa class I heat shock protein OS=Arabidopsis thaliana GN=HSP18.1 PE=2 SV=1//7.65123e-76
Novel00191	43.7725	167.004	-1.9318	-3.81531	2.6986e-12	1.1794e-10	-//-
Csa7M222870	386.213	1470.39	-1.9287	-3.80712	6.5137e-18	5.4713e-16	-//-
Csa5M114570	29.9503	113.811	-1.926	-3.8	9.3308e-07	1.4342e-05	DEF01_ARATH Defensin-like protein 1
Csa4M303040	103.351	388.194	-1.9092	-3.75601	0.0001426	0.0013092	PTR28_ARATH Protein NRT1/ PTR FAMILY 5.6
Csa4M004780	158.75	595.549	-1.9075	-3.75158	1.9044e-11	7.1466e-10	LYPA2_HUMAN Acyl-protein thioesterase 2
Csa1M418800	71.2048	264.359	-1.8925	-3.71278	1.4363e-10	4.6939e-09	GDU3_GLUTAMINE DUMPER 3
Csa7M047370	10.8251	39.9574	-1.8841	-3.69123	0.00061203	0.0046918	sp|Q8S8I4|EPF1_ARATH Protein EPIDERMAL PATTERNING FACTOR 1 OS=Arabidopsis thaliana GN=EPF1 PE=1 SV=1//1.15408e-25
Csa2M139860	69.6787	256.89	-1.8824	-3.68688	3.3539e-12	1.4453e-10	Cytochrome P450 714C2
Csa6M078510	21.3491	78.4156	-1.877	-3.6731	2.0541e-06	2.9447e-05	sp|Q6NKQ9|CRR15_ARATH Cysteine-rich repeat secretory protein 15 OS=Arabidopsis thaliana GN=CRRSP15 PE=1 SV=1//2.3636e-84
Csa3M113300	905.414	3300.52	-1.866	-3.64521	4.7247e-29	9.7688e-27	HSP41_PEA 22.7 kDa class IV heat shock protein
Csa1M533380	98.8969	354.256	-1.8408	-3.58209	1.5233e-20	1.6627e-18	HLS1_ARATH Probable N-acetyltransferase HLS1
Csa3M812750	183.157	647.976	-1.8229	-3.53792	4.6796e-31	1.082e-28	MYB44_ARATH Transcription factor MYB44
Csa5M175720	98.9722	348.998	-1.8181	-3.52617	4.896e-19	4.5575e-17	Thioredoxin-like protein YLS8
Csa2M000880	220.313	775.544	-1.8157	-3.5203	1.436e-34	4.5409e-32	3HID1_ARATH Probable 3-hydroxyisobutyrate dehydrogenase-like 1, mitochondrial
Csa6M490190	202.303	709.056	-1.8094	-3.50496	7.1808e-21	8.0842e-19	sp|Q9SNB4|PCL1_ARATH Transcription factor LUX OS=Arabidopsis thaliana GN=LUX PE=1 SV=1//1.01518e-12
Csa3M743950	10.7841	37.3635	-1.7927	-3.46463	0.0017673	0.01146	TLP1_PRUPE Thaumatin-like protein 1
Csa1M478040	69.9798	241.256	-1.7856	-3.44762	9.362e-15	5.4116e-13	unknown protein
Csa5M514500	13115.7	44926.9	-1.7763	-3.42547	1.8925e-06	2.7459e-05	sp|P09189|HSP7C_PETHY Heat shock cognate 70 kDa protein OS=Petunia hybrida GN=HSP70 PE=2 SV=1//0
Csa1M602030	163.848	560.488	-1.7743	-3.42072	5.9873e-27	1.0383e-24	YLS3_ARATH Protein YLS3
Csa2M351640	3749.37	12642.8	-1.7536	-3.37199	1.9486e-17	1.5018e-15	HSF30_SOLPE Heat shock factor protein HSF30
Csa6M489380	48.6513	163.855	-1.7519	-3.36802	1.4823e-10	4.8294e-09	-//-
Csa2M247580	33.6112	112.815	-1.7469	-3.35637	4.058e-05	0.00042795	ABHD6_BOVIN Monoacylglycerol lipase ABHD6
Csa1M710160	505.925	1685.34	-1.736	-3.3311	8.8105e-17	6.4221e-15	CYT1_ACTDE Cysteine proteinase inhibitor 1
Csa6M518270	40.3512	134.365	-1.7355	-3.32995	0.0011583	0.0080707	sp|Q6X7J4|WOX9_ARATH WUSCHEL-related homeobox 9 OS=Arabidopsis thaliana GN=WOX9 PE=2 SV=1//1.26509e-16
Csa7M259370	12.4057	41.2895	-1.7348	-3.32833	0.0052127	0.028099	-//-
Csa7M390100	22.0402	72.9958	-1.7277	-3.31199	1.2464e-05	0.00015082	sp|Q9FVQ0|YUC10_ARATH Probable indole-3-pyruvate monooxygenase YUCCA10 OS=Arabidopsis thaliana GN=YUC10 PE=2 SV=1//2.13902e-111
Csa5M184310	620.882	2051.65	-1.7244	-3.30443	6.5197e-52	4.381e-49	Ultraviolet-B receptor UVR8
Csa7M343850	91.233	300.743	-1.7209	-3.29642	1.8571e-05	0.00021354	sp|Q43143|PMEU1_SOLLC Pectinesterase/pectinesterase inhibitor U1 OS=Solanum lycopersicum GN=PMEU1 PE=2 SV=1//0
Csa3M912950	1601.62	5262.27	-1.7162	-3.2857	3.4932e-21	4.0602e-19	BI1_ARATH Bax inhibitor 1
Csa3M778270	144.366	473.642	-1.7141	-3.28092	6.913e-12	2.8369e-10	SILD_FORIN Secoisolariciresinol dehydrogenase (Fragment)
Csa1M662790	58.6484	191.977	-1.7108	-3.27342	9.7072e-12	3.8798e-10	GL117_ARATH Germin-like protein subfamily 1 member 17
Csa4M358770	45.5721	148.499	-1.7042	-3.25848	1.1142e-06	1.6861e-05	MADS2_PETHY Floral homeotic protein PMADS 2, MADS-domain transcription factor
Csa3M626150	100.655	327.089	-1.7003	-3.24969	2.9148e-17	2.1992e-15	-//-
Csa6M298480	12.3031	39.5638	-1.6852	-3.21585	0.0017329	0.011285	sp|P48534|APX1_PEA L-ascorbate peroxidase, cytosolic OS=Pisum sativum GN=APX1 PE=1 SV=2//1.68998e-132
Csa1M039100	6231.37	19997.2	-1.6822	-3.20917	6.9964e-08	1.3627e-06	Heat shock protein 101
Csa6M006890	7807.7	24833.2	-1.6693	-3.1806	1.1202e-53	9.6354e-51	sp|O82345|BAG6_ARATH BAG family molecular chaperone regulator 6 OS=Arabidopsis thaliana GN=BAG6 PE=1 SV=1//7.91869e-07
Csa6M006900	120.164	380.545	-1.6631	-3.16696	0.00019824	0.0017492	-//-
Csa3M778290	8.56016	27.0919	-1.6622	-3.16499	0.010671	0.049831	TPRL1_ERYCB Tropinone reductase-like 1
Csa1M366990	119.206	376.027	-1.6574	-3.15448	2.9957e-18	2.5975e-16	unknown protein
Csa6M062290	88.0035	276.414	-1.6512	-3.14095	1.7932e-14	1.0041e-12	sp|Q3E9D5|DCAM4_ARATH S-adenosylmethionine decarboxylase proenzyme 4 OS=Arabidopsis thaliana GN=SAMDC4 PE=1 SV=1//4.61278e-149
Csa5M098990	9.51129	29.3964	-1.6279	-3.09063	0.0092554	0.044573	-//-
Csa4M296280	1775.53	5486.34	-1.6276	-3.08999	8.1907e-45	4.4031e-42	UVR8_ARATH Ultraviolet-B receptor UVR8
Csa7M075610	246.965	762.308	-1.6261	-3.08677	9.5934e-29	1.9461e-26	-//-
Csa2M169720	10978.7	33859.6	-1.6249	-3.08421	1.2168e-25	1.8823e-23	CH62_CUCMA Chaperonin CPN60-2, mitochondrial
Csa7M448690	1896.65	5804.84	-1.6138	-3.06057	4.6721e-62	5.9096e-59	sp|Q4R7Y5|DNJB6_MACFA DnaJ homolog subfamily B member 6 OS=Macaca fascicularis GN=DNAJB6 PE=2 SV=1//4.60733e-12
Csa6M077410	67.0238	204.865	-1.6119	-3.05654	2.72e-11	9.9302e-10	-//-
Csa5M570400	2086.2	6372.19	-1.6109	-3.05442	4.4455e-63	6.828e-60	sp|P34893|CH10_ARATH 10 kDa chaperonin OS=Arabidopsis thaliana GN=CPN10 PE=3 SV=1//1.34672e-38
Csa7M450580	259.809	791.503	-1.6071	-3.04639	1.0102e-14	5.8079e-13	-//-
Csa7M048120	265.775	809.082	-1.6061	-3.04428	3.912e-14	2.1083e-12	sp|Q9S7R3|LSH10_ARATH Protein LIGHT-DEPENDENT SHORT HYPOCOTYLS 10 OS=Arabidopsis thaliana GN=LSH10 PE=1 SV=1//1.25756e-78
Csa3M166310	57.8957	175.075	-1.5964	-3.02388	7.3079e-10	2.0649e-08	HLS1L_ARATH Probable N-acetyltransferase HLS1-like
Csa3M047750	81.0512	242.403	-1.5805	-2.99073	2.148e-12	9.504e-11	-//-
Novel00134	27.9044	83.0014	-1.5726	-2.9744	2.1541e-05	0.0002434	-//-
Csa6M511110	28.4518	84.2345	-1.5659	-2.96062	1.78e-05	0.00020549	-//-
Csa6M450430	419.647	1239.77	-1.5628	-2.95427	4.976e-32	1.2891e-29	-//-
Csa2M176690	1351.98	3982.18	-1.5585	-2.94547	4.3919e-29	9.1689e-27	-//-
Csa3M895680	151.305	443.337	-1.5509	-2.93	1.1847e-18	1.084e-16	ERF43_ARATH Ethylene-responsive transcription factor ERF043
Csa5M162620	122.833	357.44	-1.541	-2.90996	5.6264e-08	1.1192e-06	MOCA_RHIML Rhizopine catabolism protein MocA
Csa4M646060	137.914	399.262	-1.5336	-2.89507	1.771e-05	0.00020464	GAT21_ARATH GATA transcription factor 21
Csa3M730160	20.8017	59.8696	-1.5251	-2.87807	0.00036373	0.0029784	OFP4_ARATH Transcription repressor OFP4, ovate family protein
Csa4M006190	93.6965	268.035	-1.5164	-2.86076	1.0822e-12	4.9936e-11	TMM_ARATH Protein TOO MANY MOUTHS
Csa4M022940	25.1741	71.6296	-1.5086	-2.84534	0.00012945	0.0011998	GAM1_ORYSI Transcription factor GAMYB
Csa2M236120	229.106	650.466	-1.5055	-2.83923	2.6596e-23	3.5521e-21	ARR18_ARATH Two-component response regulator ARR18
Csa6M445140	696.555	1964.41	-1.4958	-2.8202	2.0138e-37	7.3396e-35	sp|P43287|PIP22_ARATH Aquaporin PIP2-2 OS=Arabidopsis thaliana GN=PIP2-2 PE=1 SV=2//4.49744e-149
Csa7M071620	16.6345	46.8189	-1.4929	-2.81454	0.0020858	0.013114	sp|Q39262|ZFP3_ARATH Zinc finger protein 3 OS=Arabidopsis thaliana GN=ZFP3 PE=2 SV=1//1.6568e-16
Csa4M496760	179.579	504.846	-1.4912	-2.81123	2.3361e-11	8.6162e-10	PAD4_ARATH Lipase-like PAD4
Csa2M355020	26.7548	74.362	-1.4748	-2.77945	0.0094835	0.045427	GID2_ARATH F-box protein GID2, SLY1 F-box protein
Csa6M155030	46.0169	127.776	-1.4734	-2.77676	7.3359e-07	1.1539e-05	sp|Q9LVY1|TAT_ARATH Tyrosine aminotransferase OS=Arabidopsis thaliana GN=TAT PE=2 SV=1//1.55608e-161
Csa1M635920	144.127	399.073	-1.4693	-2.76888	3.8716e-06	5.2691e-05	FAFL_ARATH Protein FAF-like, chloroplastic
Csa6M000700	11.8583	32.8299	-1.4691	-2.76849	0.01061	0.049651	-//-
Csa5M139850	59.6816	165.036	-1.4674	-2.76523	2.1232e-08	4.5884e-07	MAKR6_ARATH Probable membrane-associated kinase regulator 6
Csa5M190560	1711.68	4720.5	-1.4635	-2.75777	3.6621e-27	6.402e-25	HSP11_DAUCA 17.8 kDa class I heat shock protein
Csa4M625030	39.9064	110.047	-1.4634	-2.75757	3.1075e-06	4.3194e-05	P2C55_ARATH Probable protein phosphatase 2C 55
Csa5M410730	489.284	1341.67	-1.4553	-2.74214	0.00031313	0.0026159	sp|P32289|GLNA_VIGAC Glutamine synthetase nodule isozyme OS=Vigna aconitifolia PE=2 SV=1//0
Csa6M139130	24.7294	67.6749	-1.4524	-2.73663	0.00028412	0.0024101	sp|Q9SHE9|LBD4_ARATH LOB domain-containing protein 4 OS=Arabidopsis thaliana GN=LBD4 PE=2 SV=1//2.53233e-58
Novel00545	60.5849	165.221	-1.4474	-2.72716	3.5316e-08	7.316e-07	-//-
Csa4M054280	149.409	405.648	-1.441	-2.71509	1.3954e-10	4.5739e-09	CSLG3_ARATH Cellulose synthase-like protein G3
Csa6M338660	355.065	958.097	-1.4321	-2.69839	8.0241e-07	1.2503e-05	sp|Q84VY3|STAD6_ARATH Acyl-[acyl-carrier-protein] desaturase 6, chloroplastic OS=Arabidopsis thaliana GN=S-ACP-DES6 PE=2 SV=2//0
Csa4M303090	35.5955	95.4211	-1.4226	-2.68068	2.5541e-05	0.00028412	-//-
Csa2M359970	144.25	385.887	-1.4196	-2.67511	5.1461e-15	3.0824e-13	BKI1_ARATH BRI1 kinase inhibitor 1, negative regulation of brassinosteroid biosynthetic process
Csa6M489970	65.5663	174.78	-1.4145	-2.66567	2.9723e-08	6.2599e-07	sp|Q8L3W1|VRN1_ARATH B3 domain-containing transcription factor VRN1 OS=Arabidopsis thaliana GN=VRN1 PE=1 SV=1//1.71496e-12
Csa6M103520	17.6061	46.9232	-1.4142	-2.66512	0.0032377	0.018924	sp|Q43385|DOF37_ARATH Dof zinc finger protein DOF3.7 OS=Arabidopsis thaliana GN=DOF3.7 PE=1 SV=2//8.42457e-29
Csa3M384800	25.6189	68.0686	-1.4098	-2.657	0.00038102	0.003101	11SB_CUCMA 11S globulin subunit beta
Novel00014	28.4107	75.3237	-1.4067	-2.6513	0.00022034	0.0019229	--
Csa2M351650	320.729	848.13	-1.4029	-2.64433	4.48e-24	6.4223e-22	GRXC6_ARATH Glutaredoxin-C6
Csa1M642540	17226.8	45468.7	-1.4002	-2.63938	3.6431e-13	1.7604e-11	DNJH_CUCSA DnaJ protein homolog
Csa1M599450	18011.9	47504.9	-1.3991	-2.63737	4.9409e-23	6.439e-21	RUBB_PEA RuBisCO large subunit-binding protein subunit beta, chloroplastic
Csa5M622760	20.5006	54.0274	-1.398	-2.63536	0.001422	0.0095586	sp|Q9ZV06|NATAL_ARATH Probable acetyltransferase NATA1-like OS=Arabidopsis thaliana GN=At2g39020 PE=2 SV=1//3.50131e-83
Csa6M010000	448.248	1180.21	-1.3967	-2.63299	1.9827e-10	6.2976e-09	sp|Q9SND9|Y3028_ARATH Uncharacterized acetyltransferase At3g50280 OS=Arabidopsis thaliana GN=At3g50280 PE=3 SV=1//4.68267e-59
Csa2M047810	166.585	437.923	-1.3944	-2.62879	7.0984e-16	4.7256e-14	ATL13_ARATH RING-H2 finger protein ATL13
Csa1M169940	22.1976	58.2949	-1.393	-2.62624	0.0012195	0.0084102	Receptor-like kinase TMK4
Csa2M351620	5964.5	15635	-1.3903	-2.62133	1.2092e-17	9.6662e-16	Calmodulin binding protein
Csa5M623560	251.864	659.858	-1.3895	-2.61988	1.7265e-20	1.8562e-18	SCL3_ARATH Scarecrow-like protein 3, GRAS family transcription factor
Csa7M069190	1268.54	3313.74	-1.3853	-2.61226	5.6997e-15	3.395e-13	-//-
Csa7M387160	558.08	1454.04	-1.3815	-2.60539	1.5007e-10	4.8821e-09	sp|Q9M1W4|HMT2_ARATH Homocysteine S-methyltransferase 2 OS=Arabidopsis thaliana GN=HMT-2 PE=1 SV=1//3.2034e-170
Csa7M073680	28.7186	74.6982	-1.3791	-2.60106	0.00022276	0.0019424	sp|Q9LJK2|ABAH4_ARATH Abscisic acid 8&apos;-hydroxylase 4 OS=Arabidopsis thaliana GN=CYP707A4 PE=2 SV=2//0
Csa2M013290	191.656	498.262	-1.3784	-2.5998	5.7451e-17	4.2452e-15	|ACP1_CASGL Acyl carrier protein 1, chloroplastic
Csa2M351630	2218.15	5765.15	-1.378	-2.59908	5.7729e-09	1.3839e-07	unknown protein
Csa2M249260	460.518	1194.49	-1.3751	-2.59386	1.5426e-27	2.7413e-25	OCS1_MAIZE Ocs element-binding factor 1
Csa4M641680	28.9581	75.0865	-1.3746	-2.59296	0.007292	0.03687	CAES_ARATH Probable carbohydrate esterase At4g34215
Csa3M792060	1583.6	4105.55	-1.3744	-2.5926	1.764e-43	8.8211e-41	SL30A_ARATH Serine/arginine-rich SC35-like splicing factor SCL30A
Csa4M436980	319.149	827.279	-1.3741	-2.59206	7.0345e-11	2.4358e-09	ARR9_ARATH Two-component response regulator ARR9
Csa2M007950	164.641	426.425	-1.373	-2.59009	1.4739e-05	0.00017481	US74C_DROME UDP-sugar transporter UST74c
Csa7M046110	904.743	2339.24	-1.3705	-2.5856	7.9773e-37	2.8121e-34	sp|Q9SUC9|UGPI7_ARATH Uncharacterized GPI-anchored protein At4g28100 OS=Arabidopsis thaliana GN=At4g28100 PE=1 SV=1//1.81684e-112
Csa6M014820	59.3737	153.067	-1.3663	-2.57809	3.0441e-07	5.1313e-06	-//-
Csa1M145960	3640.53	9350.51	-1.3609	-2.56845	7.0497e-49	4.2278e-46	Splicing factor U2af small subunit B
Csa1M033240	42.4176	108.229	-1.3514	-2.5516	0.0024351	0.014948	unknown protein
Csa1M527870	9193.67	23419.1	-1.349	-2.54735	1.6339e-08	3.6071e-07	HS17B_ARATH 17.6 kDa class I heat shock protein 2
Csa2M110220	39.2974	100.036	-1.348	-2.54559	3.464e-05	0.00037224	BRXL4_ARATH Protein Brevis radix-like 4
Csa6M451510	90.1315	229.103	-1.3459	-2.54189	1.5798e-09	4.2122e-08	sp|Q9LLL8|SBT4E_ARATH Subtilisin-like protease SBT4.14 OS=Arabidopsis thaliana GN=SBT4.14 PE=2 SV=1//0
Csa4M303710	15.2796	38.8285	-1.3455	-2.54118	0.0096105	0.045903	-//-
Csa3M748780	311.019	790.189	-1.3452	-2.54065	9.3961e-10	2.6104e-08	-//-
Csa5M647280	58.929	149.073	-1.339	-2.52976	0.0060978	0.031856	sp|Q56XQ6|PTR15_ARATH Protein NRT1/ PTR FAMILY 4.4 OS=Arabidopsis thaliana GN=NPF4.4 PE=2 SV=1//0
Novel00646	74.8791	189.082	-1.3364	-2.5252	0.0001453	0.0013307	--
Csa6M125250	462.105	1166.21	-1.3355	-2.52363	2.147e-26	3.5513e-24	sp|Q9LMA1|FMO1_ARATH Probable flavin-containing monooxygenase 1 OS=Arabidopsis thaliana GN=FMO1 PE=2 SV=1//2.36263e-113
Csa4M043950	139.029	350.683	-1.3348	-2.52241	4.6688e-05	0.00048593	PME53_ARATH Probable pectinesterase 53
Csa4M647490	637.188	1602.22	-1.3303	-2.51455	3.0769e-30	6.7514e-28	CKX7_ARATH Cytokinin dehydrogenase 7
Csa5M139630	20.439	51.3004	-1.3276	-2.50985	0.0032224	0.018855	CRF2_ARATH Ethylene-responsive transcription factor CRF2
Csa3M354520	88.3934	221.477	-1.3251	-2.5055	4.1775e-09	1.0313e-07	SPCH_ARATH Transcription factor SPEECHLESS
Csa3M182110	149.533	374.122	-1.323	-2.50186	3.2261e-13	1.5802e-11	PGLT1_HUMAN Protein O-glucosyltransferase 1
Csa7M048030	555.042	1380.09	-1.3141	-2.48647	1.8894e-08	4.1122e-07	-//-
Csa7M414490	37.3951	92.8271	-1.3117	-2.48234	0.00010665	0.0010123	sp|Q94K41|SDR3B_ARATH Short-chain dehydrogenase reductase 3b OS=Arabidopsis thaliana GN=SDR3b PE=2 SV=1//2.29417e-90
Csa1M569270	52793.5	130590	-1.3066	-2.47358	8.8642e-14	4.6152e-12	HSP80_SOLLC Heat shock cognate protein 80
Csa6M504680	96.6663	239.079	-1.3064	-2.47324	2.585e-09	6.649e-08	sp|Q9LP24|Y1571_ARATH Probable leucine-rich repeat receptor-like protein kinase At1g35710 OS=Arabidopsis thaliana GN=At1g35710 PE=2 SV=1//4.91386e-41
Csa6M080400	192.368	474.603	-1.3029	-2.46724	4.1129e-15	2.4983e-13	-//-
Csa4M638410	293.523	723.036	-1.3006	-2.46331	1.7652e-06	2.5698e-05	KO1_ARATH Ent-kaurene oxidase, chloroplastic
Csa4M007100	302.555	741.557	-1.2934	-2.45105	1.2199e-19	1.2144e-17	GH317_ARATH Indole-3-acetic acid-amido synthetase GH3.17
Csa5M517800	131.365	321.844	-1.2928	-2.45003	1.289e-06	1.9221e-05	sp|Q0WUQ1|BAG1_ARATH BAG family molecular chaperone regulator 1 OS=Arabidopsis thaliana GN=BAG1 PE=1 SV=1//4.16046e-19
Csa6M445000	1095.93	2676.47	-1.2882	-2.44223	1.7853e-34	5.4842e-32	-//-
Csa5M512930	79151	192956	-1.2856	-2.43783	4.1036e-11	1.4604e-09	sp|P27322|HSP72_SOLLC Heat shock cognate 70 kDa protein 2 OS=Solanum lycopersicum GN=HSC-2 PE=2 SV=1//0
Csa3M904070	104.241	253.363	-1.2813	-2.43058	1.3788e-09	3.7154e-08	PTR14_ARATH Protein NRT1/ PTR FAMILY 7.3
Csa4M326550	1065.41	2588.73	-1.2808	-2.42974	5.1633e-34	1.5209e-31	AGT22_ARATH Alanine--glyoxylate aminotransferase 2 homolog 2, mitochondrial
Csa6M111370	2876.5	6976.15	-1.2781	-2.42519	3.8043e-12	1.6103e-10	sp|P36183|ENPL_HORVU Endoplasmin homolog OS=Hordeum vulgare PE=2 SV=1//0
Csa7M363060	9664.56	23425.5	-1.2773	-2.42385	5.3522e-24	7.5716e-22	sp|Q38931|FKB62_ARATH Peptidyl-prolyl cis-trans isomerase FKBP62 OS=Arabidopsis thaliana GN=FKBP62 PE=1 SV=2//0
Csa4M000650	127.048	307.651	-1.2759	-2.4215	6.2778e-11	2.195e-09	-//-
Csa6M107910	119.986	289.575	-1.2711	-2.41346	1.8841e-10	6.0021e-09	sp|O23090|BH014_ARATH Transcription factor bHLH14 OS=Arabidopsis thaliana GN=BHLH14 PE=2 SV=1//8.99567e-54
Csa5M149330	8048.67	19419.8	-1.2707	-2.41279	4.4243e-13	2.1236e-11	BIP5_TOBAC Luminal-binding protein 5
Csa6M519710	443.924	1065.77	-1.2635	-2.40077	4.5786e-23	6.0401e-21	-//-
Csa3M681660	33.2279	79.5445	-1.2594	-2.39396	0.00047093	0.003726	SCP35_ARATH Serine carboxypeptidase-like 35
Csa5M162580	470.282	1121.21	-1.2535	-2.38419	6.7244e-05	0.00067536	TIP22_ARATH Probable aquaporin TIP2-2
Csa6M497240	159.352	379.901	-1.2534	-2.38403	1.2182e-08	2.769e-07	sp|Q9LSK9|Y5566_ARATH Uncharacterized protein At5g65660 OS=Arabidopsis thaliana GN=At5g65660 PE=2 SV=1//1.36608e-24
Csa7M033320	22.3207	53.2113	-1.2533	-2.38386	0.0045946	0.025295	sp|Q9FI80|PP425_ARATH Pentatricopeptide repeat-containing protein At5g48910 OS=Arabidopsis thaliana GN=PCMP-H38 PE=2 SV=1//6.32478e-09
Csa7M272120	55.9935	133.439	-1.2528	-2.38303	8.8135e-06	0.00011038	-//-
Csa5M636530	42.8419	102.074	-1.2525	-2.38254	9.3614e-05	0.00089986	sp|Q1PDW5|FTSH6_ARATH ATP-dependent zinc metalloprotease FTSH 6, chloroplastic OS=Arabidopsis thaliana GN=FTSH6 PE=2 SV=1//0
Novel00482	53.489	127.365	-1.2517	-2.38122	2.601e-05	0.00028845	-//-
Csa5M196580	543.82	1294	-1.2506	-2.3794	8.5867e-25	1.2734e-22	UGT8_CATRO 7-deoxyloganetic acid glucosyltransferase
Csa7M046660	154.425	367.239	-1.2498	-2.37808	0.00019579	0.0017304	-//-
Csa3M172920	11236.7	26666.2	-1.2468	-2.37314	5.7678e-14	3.0548e-12	FKB65_ARATH Peptidyl-prolyl cis-trans isomerase FKBP65
Csa5M152830	383.64	908.996	-1.2445	-2.36936	1.4029e-20	1.5391e-18	-//-
Csa4M326540	69.2272	163.281	-1.2379	-2.35855	1.4474e-06	2.1406e-05	-//-
Csa1M575010	218.089	513.567	-1.2356	-2.35479	9.4674e-06	0.00011774	PME53_ARATH Probable pectinesterase 53
Csa1M575000	227.915	534.983	-1.231	-2.3473	1.2364e-13	6.2703e-12	-//-
Csa4M652050	2858.27	6703.86	-1.2298	-2.34534	7.2462e-39	2.8855e-36	CLPB3_ORYSJ Chaperone protein ClpB3, mitochondrial
Csa1M569330	1347.15	3158.14	-1.2292	-2.34437	2.7669e-33	7.5313e-31	SR30_ARATH Serine/arginine-rich splicing factor SR30
Csa3M481240	80.887	189.192	-1.2259	-2.33901	3.1989e-07	5.3823e-06	-//-
Csa5M613610	34.2817	80.1467	-1.2252	-2.33788	0.00058948	0.0045416	-//-
Csa5M135340	6838.94	15987	-1.2251	-2.33772	2.0356e-41	9.3131e-39	HSP83_IPONI Heat shock protein 83
Csa7M072770	480.738	1123.04	-1.2241	-2.3361	3.9918e-15	2.4316e-13	sp|P19244|HSP41_PEA 22.7 kDa class IV heat shock protein OS=Pisum sativum GN=HSP22.7 PE=2 SV=1//9.22223e-40
Csa6M301060	51.6416	120.365	-1.2208	-2.33076	3.4903e-05	0.0003747	sp|Q9SIB4|WOX3_ARATH WUSCHEL-related homeobox 3 OS=Arabidopsis thaliana GN=WOX3 PE=2 SV=1//4.83975e-36
Csa7M405850	22.4439	52.1399	-1.2161	-2.32318	0.0052875	0.028424	sp|O35723|DNJB3_MOUSE DnaJ homolog subfamily B member 3 OS=Mus musculus GN=Dnajb3 PE=2 SV=1//4.83818e-17
Csa2M360620	646.672	1498.34	-1.2123	-2.31707	2.7292e-25	4.1918e-23	MYB44_ARATH Transcription factor MYB44
Csa1M569290	31917.2	73815	-1.2096	-2.31274	5.3682e-13	2.5538e-11	HSP80_SOLLC Heat shock cognate protein 80
Novel00188	428.904	991.876	-1.2095	-2.31257	2.7876e-08	5.8957e-07	--
Csa5M167180	158.893	367.07	-1.208	-2.31017	2.985e-11	1.0806e-09	-//-
Csa7M073480	26.8574	61.8848	-1.2043	-2.30425	0.0026692	0.016154	sp|Q9AT54|SCGT_TOBAC Scopoletin glucosyltransferase OS=Nicotiana tabacum GN=TOGT1 PE=1 SV=1//0
Csa3M690310	1636.02	3760.55	-1.2008	-2.29867	3.0598e-31	7.3105e-29	FKB42_ARATH Peptidyl-prolyl cis-trans isomerase FKBP42
Csa5M190550	152.701	350.533	-1.1988	-2.29549	9.9725e-11	3.3703e-09	HSP16_SOYBN 18.5 kDa class I heat shock protein
Csa2M379350	186.456	427.518	-1.1972	-2.29294	2.4072e-12	1.0585e-10	YUC4_ARATH Probable indole-3-pyruvate monooxygenase YUCCA4, Dimethylaniline monooxygenase
Novel00273	344.487	789.695	-1.1968	-2.29231	4.5528e-18	3.9004e-16	--
Csa3M750920	2037.24	4658.6	-1.1933	-2.28675	1.0875e-07	2.0282e-06	ALF_ORYSJ Fructose-bisphosphate aldolase cytoplasmic isozyme
Csa2M381870	1255.08	2867.6	-1.1921	-2.28485	1.0631e-11	4.1867e-10	PT5_ARATH Adenine phosphoribosyltransferase 5
Csa4M045010	102.168	233.446	-1.1921	-2.28485	5.3012e-08	1.0663e-06	PER72_ARATH Peroxidase 72
Csa5M151520	38.5105	87.8765	-1.1902	-2.28184	0.00045278	0.0035954	-//-
Csa7M043040	21.3286	48.5213	-1.1858	-2.2749	0.010106	0.047695	sp|Q40541|NPK1_TOBAC Mitogen-activated protein kinase kinase kinase NPK1 OS=Nicotiana tabacum GN=NPK1 PE=1 SV=1//1.63479e-52
Csa1M183580	447.996	1017.96	-1.1841	-2.27222	4.084e-20	4.162e-18	Cysteine proteinase inhibitor 5
Csa2M372820	78.978	179.291	-1.1828	-2.27017	1.3868e-06	2.0565e-05	EPFL2_ARATH EPIDERMAL PATTERNING FACTOR-like protein 2
Csa1M479640	68.1391	153.907	-1.1755	-2.25871	5.2587e-06	6.9544e-05	PTR39_ARATH Protein NRT1/ PTR FAMILY 2.3
Csa7M393460	85.9438	192.758	-1.1653	-2.2428	7.5419e-07	1.1838e-05	sp|Q9KG32|Y283_BACHD Uncharacterized isomerase BH0283 OS=Bacillus halodurans (strain ATCC BAA-125 / DSM 18197 / FERM 7344 / JCM 9153 / C-125) GN=BH0283 PE=3 SV=1//9.3114e-57
Csa5M139190	154.377	346.208	-1.1652	-2.24264	8.7689e-08	1.6672e-06	ATXR6_ARATH Histone-lysine N-methyltransferase ATXR6
Csa6M434340	1030.17	2309.38	-1.1646	-2.24171	1.1656e-27	2.1062e-25	sp|Q9LPS1|HXK3_ARATH Hexokinase-3 OS=Arabidopsis thaliana GN=At1g50460 PE=1 SV=1//0
Csa1M479610	21098.9	47180.6	-1.161	-2.23612	5.013e-30	1.0888e-27	APX1_PEA L-ascorbate peroxidase, cytosolic
Csa3M822330	106.848	238.761	-1.16	-2.23457	7.8283e-08	1.5067e-06	BGL24_ORYSJ Beta-glucosidase 24
Csa1M590290	1225.93	2738.42	-1.1595	-2.2338	2.1352e-20	2.2617e-18	YG75_SCHPO Uncharacterized membrane protein C776.05
Csa5M604260	93.6554	209.133	-1.159	-2.23303	3.3465e-07	5.6044e-06	sp|P46668|ATHB6_ARATH Homeobox-leucine zipper protein ATHB-6 OS=Arabidopsis thaliana GN=ATHB-6 PE=1 SV=1//1.53782e-29
Csa4M012500	61.9398	138.233	-1.1582	-2.23179	2.597e-05	0.00028815	DCTP1_HUMAN dCTP pyrophosphatase 1
Csa4M051360	61.4607	137.167	-1.1582	-2.23179	0.0048859	0.026557	|CRF2_ARATH Ethylene-responsive transcription factor CRF2
Csa4M644680	72.628	162.048	-1.1578	-2.23117	5.9063e-06	7.7299e-05	-//-
Csa1M014530	48.405	107.945	-1.1571	-2.23009	0.00017064	0.0015334	unknown protein
Csa4M002520	38.1067	84.9644	-1.1568	-2.22962	0.0046853	0.025694	CSLD5_ARATH Cellulose synthase-like protein D5
Csa2M287080	920.624	2051.76	-1.1562	-2.2287	2.0331e-05	0.00023132	STS14 protein: Pathogenesis-related protein 1A
Csa1M527860	7021.67	15572	-1.1491	-2.21776	2.4191e-16	1.6619e-14	HSP13_SOYBN 17.5 kDa class I heat shock protein
Csa3M147740	523.012	1153.81	-1.1415	-2.2061	3.6459e-20	3.7511e-18	HSP7H_ARATH Heat shock 70 kDa protein 8
Csa5M099500	188.59	415.643	-1.1401	-2.20396	2.9169e-11	1.0577e-09	-//-
Csa2M361440	595.92	1311.93	-1.1385	-2.20152	2.6427e-21	3.1052e-19	METL2_ARATH Methyltransferase-like protein 2
Csa6M500520	5257.52	11572.7	-1.1383	-2.20121	1.9524e-11	7.2888e-10	-//-
Csa6M426380	259.282	570.235	-1.137	-2.19923	0.00036293	0.002973	sp|Q0V865|FAFL_ARATH Protein FAF-like, chloroplastic OS=Arabidopsis thaliana GN=At5g22090 PE=2 SV=1//6.49322e-21
Csa6M518930	400.405	880.609	-1.137	-2.19923	0.0054486	0.029116	sp|P51850|PDC1_PEA Pyruvate decarboxylase 1 OS=Pisum sativum GN=PDC1 PE=2 SV=1//0
Csa4M608090	77.0415	169.123	-1.1344	-2.19527	5.2024e-06	6.8924e-05	B561M_ARATH Cytochrome b561 domain-containing protein At4g18260
Csa6M446520	577.698	1264.76	-1.1305	-2.18935	1.1008e-20	1.2148e-18	-//-
Csa3M748240	380.164	831.565	-1.1292	-2.18737	8.5556e-14	4.4653e-12	-//-
Csa7M390070	163.813	356.324	-1.1211	-2.17513	7.786e-10	2.1828e-08	sp|Q9KG32|Y283_BACHD Uncharacterized isomerase BH0283 OS=Bacillus halodurans (strain ATCC BAA-125 / DSM 18197 / FERM 7344 / JCM 9153 / C-125) GN=BH0283 PE=3 SV=1//2.10367e-53
Csa6M133760	5623.37	12187.2	-1.1159	-2.1673	2.0428e-12	9.1324e-11	sp|P35131|UBC8_ARATH Ubiquitin-conjugating enzyme E2 8 OS=Arabidopsis thaliana GN=UBC8 PE=1 SV=1//1.5555e-101
Csa5M487700	25.5779	55.4169	-1.1154	-2.16655	0.0074595	0.037574	-//-
Csa7M387720	8899.05	19272.9	-1.1149	-2.1658	9.0527e-10	2.5215e-08	sp|Q9LUH8|HFA6B_ARATH Heat stress transcription factor A-6b OS=Arabidopsis thaliana GN=HSFA6b PE=2 SV=1//1.87595e-112
Csa1M064770	32.2358	69.7709	-1.114	-2.16445	0.00325	0.018975	unknown protein
Csa1M025190	67.366	145.413	-1.1101	-2.15861	3.0073e-05	0.00032892	unknown protein
Csa3M303630	40.3512	86.5912	-1.1016	-2.14593	0.0011939	0.008281	ODO1_PETHY Protein ODORANT1, MYB-related transcription factor
Csa6M077380	57.8547	124.007	-1.0999	-2.1434	0.00012055	0.001128	sp|Q9C5P7|SEC1A_ARATH Protein transport Sec1a OS=Arabidopsis thaliana GN=SEC1A PE=2 SV=3//0
Csa6M080390	1603.12	3430.51	-1.0975	-2.13984	9.0523e-28	1.6926e-25	sp|A5GNB0|CH10_SYNPW 10 kDa chaperonin OS=Synechococcus sp. (strain WH7803) GN=groS PE=3 SV=1//1.99937e-09
Csa1M369490	97.3778	208.166	-1.0961	-2.13776	1.1453e-06	1.7307e-05	unknown protein
Csa7M056500	4960.52	10586.2	-1.0936	-2.13406	1.069e-17	8.707e-16	sp|O81865|P2A01_ARATH Protein PHLOEM PROTEIN 2-LIKE A1 OS=Arabidopsis thaliana GN=PP2A1 PE=2 SV=1//4.42093e-24
Csa4M008800	1559.07	3326.36	-1.0933	-2.13362	1.7642e-27	3.1095e-25	SCP45_ARATH Serine carboxypeptidase-like 45
Csa6M366280	29.7861	63.4828	-1.0917	-2.13125	0.0059256	0.031153	sp|Q9SYK9|U74E2_ARATH UDP-glycosyltransferase 74E2 OS=Arabidopsis thaliana GN=UGT74E2 PE=1 SV=1//1.51056e-121
Csa1M528490	8164.76	17397.5	-1.0914	-2.13081	1.5912e-34	4.9586e-32	Serine/arginine-rich splicing factor SR45a
Csa1M527880	5242.44	11139.4	-1.0874	-2.12491	5.5731e-08	1.1115e-06	HSP16_SOYBN 18.5 kDa class I heat shock protein
Csa4M001970	1095.15	2327.11	-1.0874	-2.12491	2.0061e-05	0.00022879	RAP23_ARATH Ethylene-responsive transcription factor RAP2-3
Csa5M151530	138.297	293.772	-1.0869	-2.12417	0.0001221	0.001139	CRF4_ARATH Ethylene-responsive transcription factor CRF4
Csa4M026860	814.652	1724.23	-1.0817	-2.11653	5.4292e-22	6.6711e-20	PABN3_ARATH Polyadenylate-binding protein 3
Csa4M022930	799.202	1690.88	-1.0811	-2.11565	2.4656e-18	2.164e-16	RGAPX_ARATH Uncharacterized Rho GTPase-activating protein At5g61530
Csa7M046650	129.374	273.664	-1.0809	-2.11536	7.4286e-08	1.4365e-06	-//-
Csa2M361570	625.96	1323.58	-1.0803	-2.11448	9.8782e-11	3.3503e-09	DUT_SOLLC Deoxyuridine 5&apos;-triphosphate nucleotidohydrolase
Csa2M404840	121.601	257.104	-1.0802	-2.11433	1.7277e-07	3.0704e-06	-//-
Csa6M147530	28476.4	60202.4	-1.0801	-2.11418	6.9984e-18	5.8555e-16	sp|P08926|RUBA_PEA RuBisCO large subunit-binding protein subunit alpha, chloroplastic OS=Pisum sativum PE=1 SV=2//0
Csa2M004720	3525.71	7442.39	-1.0779	-2.11096	8.8083e-10	2.4566e-08	MBF1C_ARATH Multiprotein-bridging factor 1c
Csa4M639890	507.589	1070.72	-1.0768	-2.10935	6.1064e-10	1.7625e-08	LIP_THELA Lipase
Csa7M396430	9352.82	19657.6	-1.0716	-2.10176	1.7503e-33	4.8252e-31	sp|P0C8Z0|Y8359_ORYSI Uncharacterized protein OsI_027940 OS=Oryza sativa subsp. indica GN=OsI_027940 PE=1 SV=2//1.6419e-46
Csa4M002510	93.7513	196.956	-1.071	-2.10089	0.00023055	0.0019966	CSLD5_ARATH Cellulose synthase-like protein D5
Csa5M158570	497.009	1042.14	-1.0682	-2.09682	1.2526e-05	0.0001514	AMO_ARATH Primary amine oxidase
Csa7M407840	302.877	634.422	-1.0667	-2.09464	3.5356e-13	1.72e-11	-//-
Csa1M004870	28.4518	59.5802	-1.0663	-2.09406	0.0083445	0.041031	KNAT2_ARATH Homeobox protein knotted-1-like 2
Csa2M155100	110.673	231.634	-1.0655	-2.0929	8.6252e-07	1.3333e-05	RCH2_ARATH Receptor-like protein kinase 2
Csa2M369820	733.752	1530.78	-1.0609	-2.08623	2.3989e-20	2.5286e-18	ZHD2_ARATH Zinc-finger homeodomain protein 2
Csa7M322060	432.175	901.517	-1.0607	-2.08594	0.0068456	0.034964	sp|P25141|ADH1_PETHY Alcohol dehydrogenase 1 OS=Petunia hybrida GN=ADH1 PE=3 SV=1//0
Csa2M228420	136.716	284.879	-1.0592	-2.08378	7.8995e-08	1.518e-06	HFA6B_ARATH Heat stress transcription factor A-6b
Csa6M324830	270.983	562.834	-1.0545	-2.077	5.8367e-12	2.4229e-10	-//-
Csa5M152910	424.163	880.404	-1.0535	-2.07556	2.0912e-15	1.3304e-13	RHA1B_ARATH E3 ubiquitin-protein ligase RHA1B, BRASSINOSTEROID-RESPONSIVE RING-H2
Csa2M365680	163.327	338.374	-1.0509	-2.07182	1.3192e-08	2.9798e-07	GAOA_GIBZE Galactose oxidase
Csa1M066510	1088.89	2255.52	-1.0506	-2.07139	1.121e-13	5.753e-12	Phosphosulfolactate synthase
Csa3M035330	10946.4	22660.2	-1.0497	-2.0701	1.2429e-06	1.8602e-05	HSOP3_ARATH Hsp70-Hsp90 organizing protein 3
Csa1M540350	218.281	449.74	-1.0429	-2.06037	3.8159e-10	1.146e-08	CBDAS_CANSA Cannabidiolic acid synthase
Csa4M629480	216.686	446.145	-1.0419	-2.05894	3.0889e-10	9.5021e-09	NAC98_ARATH Protein CUP-SHAPED COTYLEDON 2
Csa4M365050	778.085	1601.02	-1.041	-2.05765	0.0026022	0.015811	|WTR32_ARATH WAT1-related protein At4g08300
Csa1M096090	164.367	337.812	-1.0393	-2.05523	9.5017e-08	1.7875e-06	Cannabidiolic acid synthase
Csa4M193240	6002.8	12337.1	-1.0393	-2.05523	2.2854e-19	2.2037e-17	Formin-like protein 20
Csa7M446710	21656.2	44468.5	-1.038	-2.05338	2.9903e-10	9.2253e-09	sp|Q9S7C0|HSP7O_ARATH Heat shock 70 kDa protein 14 OS=Arabidopsis thaliana GN=HSP70-14 PE=2 SV=1//0
Csa3M829190	3912.61	8031.05	-1.0375	-2.05267	1.6352e-17	1.2786e-15	GASAE_ARATH Gibberellin-regulated protein 14
Csa6M405320	229.612	470.291	-1.0344	-2.04826	2.7953e-05	0.00030762	sp|Q9SV31|PIP25_ARATH Probable aquaporin PIP2-5 OS=Arabidopsis thaliana GN=PIP2-5 PE=1 SV=1//4.55023e-153
Csa4M056620	543.69	1111.1	-1.0311	-2.04358	0.0011775	0.008194	AB14G_ARATH ABC transporter G family member 14
Csa1M602530	381.061	777.043	-1.028	-2.0392	5.2865e-09	1.2744e-07	ASO_CUCSA L-ascorbate oxidase
Csa4M651740	30.0119	61.1262	-1.0263	-2.03679	0.009283	0.044676	EDR2L_ARATH Protein ENHANCED DISEASE RESISTANCE 2-like
Csa6M423450	174.604	355.315	-1.025	-2.03496	9.0511e-08	1.7148e-06	sp|Q9SHJ5|GPAT1_ARATH Glycerol-3-phosphate acyltransferase 1 OS=Arabidopsis thaliana GN=GPAT1 PE=1 SV=1//0
Csa1M574980	29.6287	59.9739	-1.0173	-2.02413	0.010013	0.047396	S47A2_MOUSE Multidrug and toxin extrusion protein 2
Csa5M496510	114.943	232.293	-1.015	-2.0209	2.0365e-06	2.9214e-05	-//-
Csa3M126190	733.218	1477.36	-1.0107	-2.01489	2.6275e-18	2.2967e-16	GSO2_ARATH LRR receptor-like serine/threonine-protein kinase GSO2
Csa2M036680	261.006	524.279	-1.0062	-2.00861	0.0021539	0.013472	DCAM_ORYSJ S-adenosylmethionine decarboxylase proenzyme
Csa1M439330	2674.6	5371.89	-1.0061	-2.00847	3.0093e-19	2.8632e-17	Calcyclin-binding protein
Csa1M597740	9244.76	18540.6	-1.004	-2.00555	1.1898e-29	2.5584e-27	CH10C_ARATH 20 kDa chaperonin, chloroplastic
Csa2M036720	1028.46	2057.37	-1.0003	-2.00042	1.7773e-20	1.9014e-18	TTC1_BOVIN Tetratricopeptide repeat protein 1
Csa6M430690	50.7725	101.553	-1.0001	-2.00014	0.0012556	0.0086147	sp|Q9FMP5|CDPKH_ARATH Calcium-dependent protein kinase 17 OS=Arabidopsis thaliana GN=CPK17 PE=2 SV=1//0
